# Supplementary material for: SenMayo transcriptomic senescence panel highlights glial cells in the ageing mouse and human retina
Source: PubMed Central journal article supplement — NPJ Aging. 2024 Nov 30;10(1):60. doi: 10.1038/s41514-024-00187-9 (PMC11608257; doi:10.1038/s41514-024-00187-9), 2024-11-30
Supplement: 41514_2024_187_MOESM1_ESM.pdf [file 41514_2024_187_MOESM1_ESM.pdf]

Supp fig 1

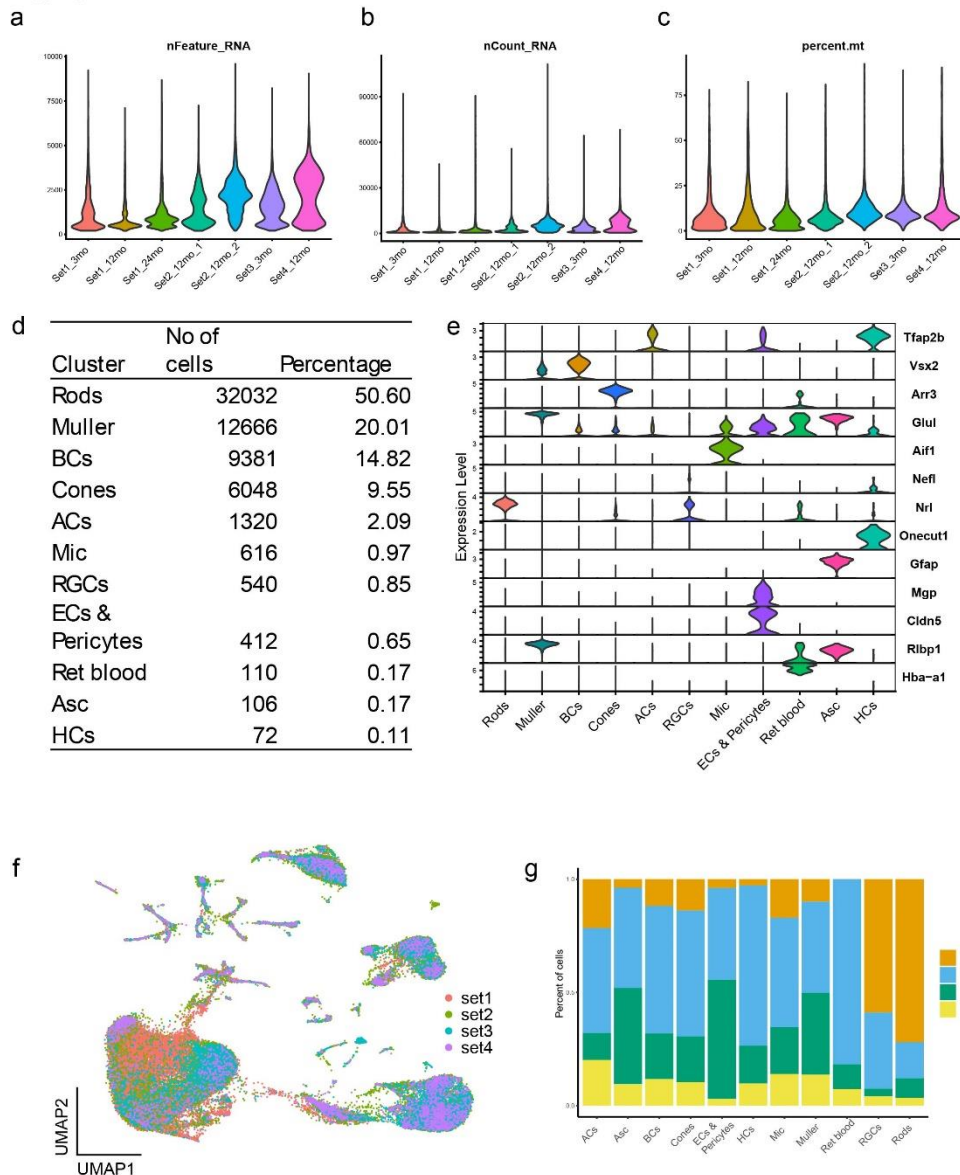

**Supplementary fig 1: Quality control data for mouse retinal scRNA dataset:** (a-c) Violin plots depicting (a) genes, (b) Unique molecular identifiers (UMIs) and (c) percentage of mitochondrial genes detected per cell per sample in the mouse retinal dataset. (d) Table depicting number of cells detected per cell type. (e) Violin plots depicting marker gene expression of the different cell type detected. As commonly known, Rod gene contamination is often observed in retinal datasets (ref 105). (f) UMAP plot depicting the sample collection set wise distribution of the cells. (g) Proportion plot depicting the contribution of the different sets to various cell types.

Supp fig 2

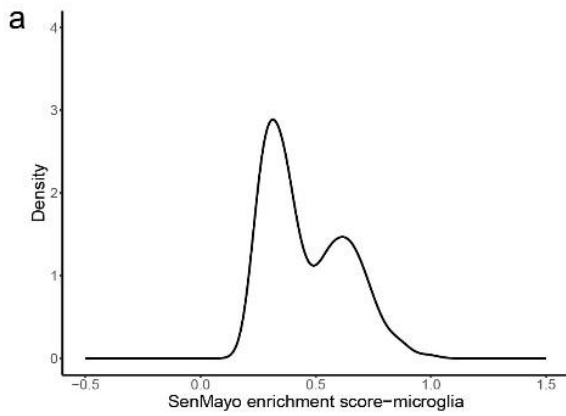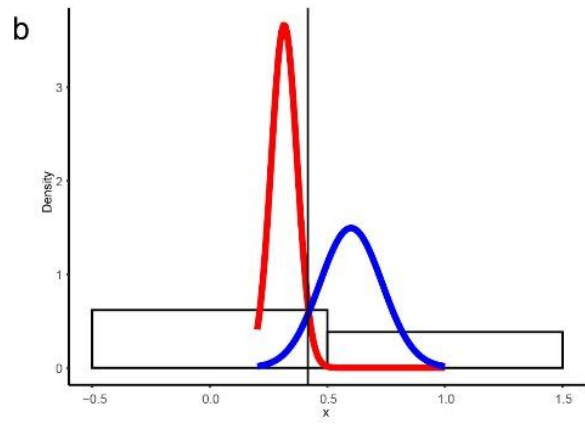

**c** Cherry\_2023\_geneset

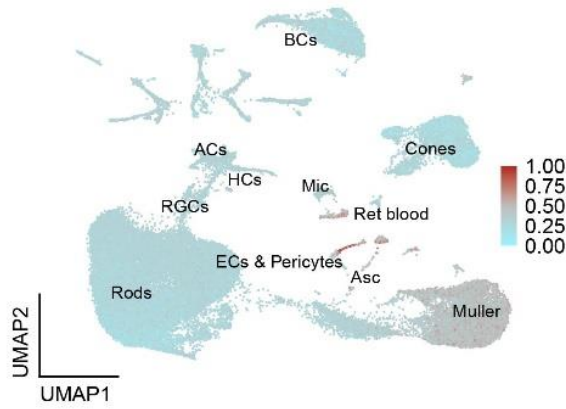

**d** SenMayo-reduced

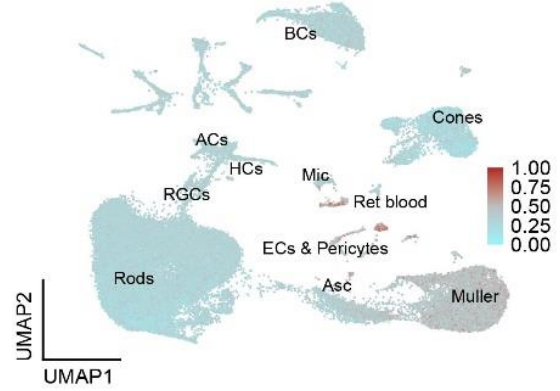

**e**

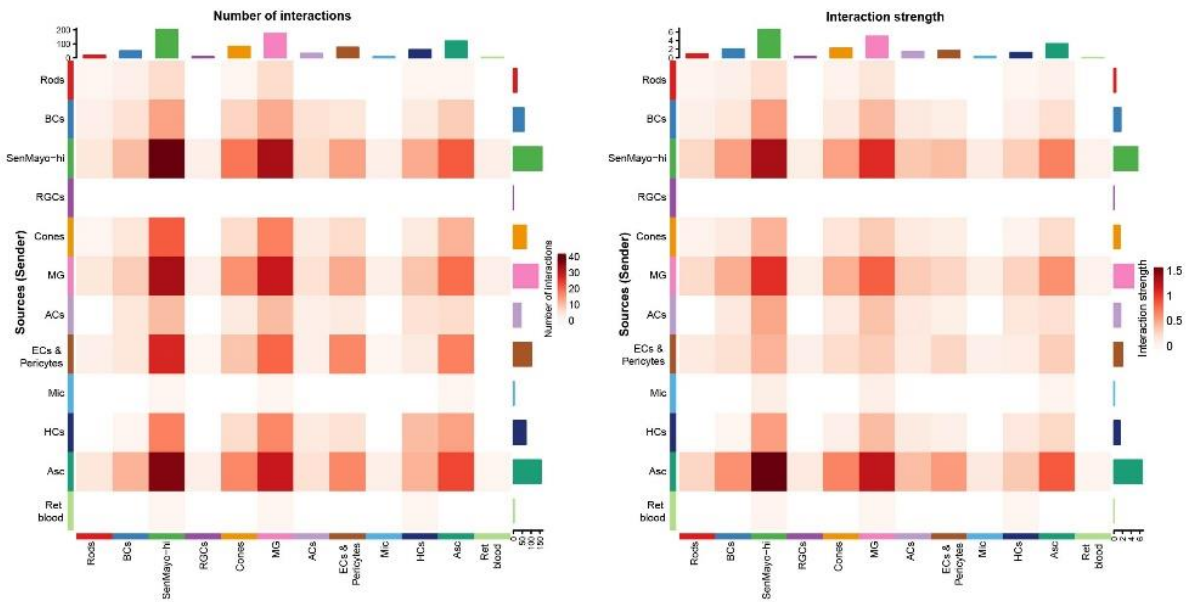

Supp fig 2

f

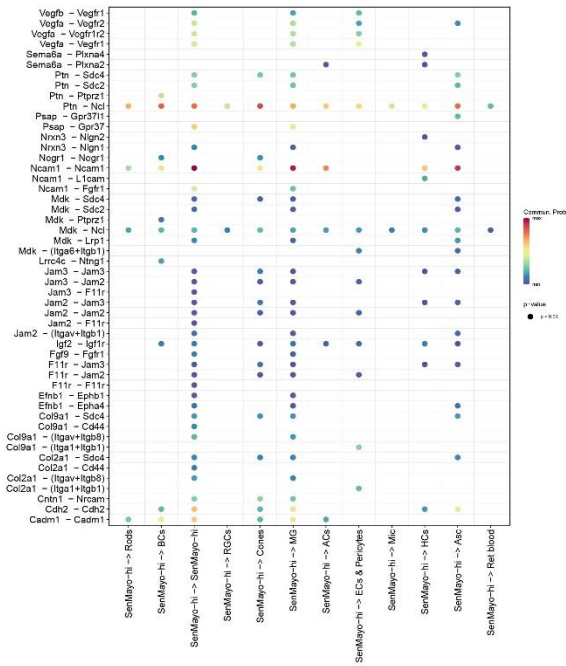

g

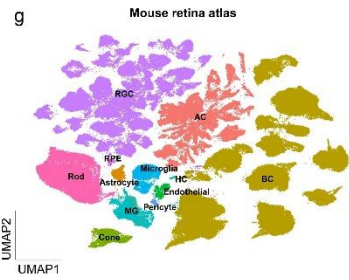

h

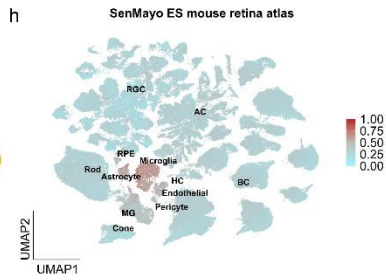

Supp fig 2

i

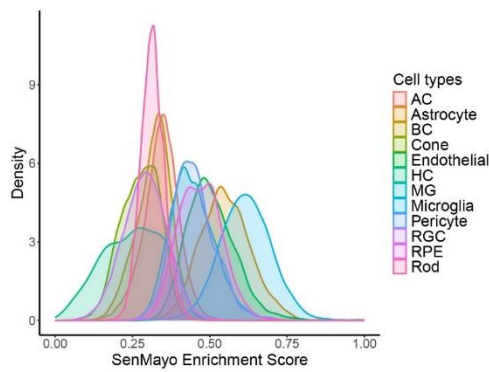

Reduced SenMayo ES mouse retina atlas

j

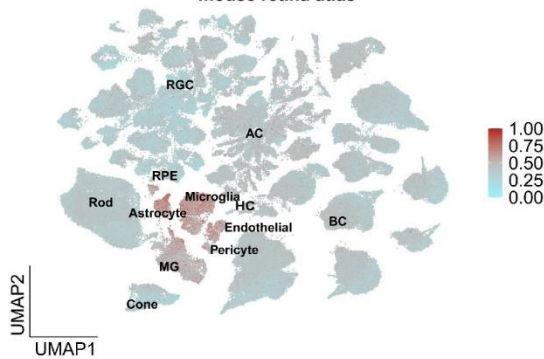

**Supplementary fig 2: Method of determining SenMayo-hi cells in the mouse retinal dataset:** (a) The microglia (Mic) subcluster which scored highest for SenMayo enrichment was used to set the threshold for SenMayo-hi cells. Distribution of the SenMayo panel enrichment scores were observed to be bimodal. (b) The mixtools package uses a Gaussian mixture model to cluster the data. The intersection point of the two clusters was set as the threshold and cells that scored higher were labelled SenMayo-hi and those that scored lower were labelled SenMayo-low cells. (c) Using another published panel of senescence related genes (Cherry\_2023), once again Mic, Asc and MG were the cell types that scored high for this independent panel as observed in the UMAP. (d) To ensure the microglial genes in the SenMayo panel did not skew the analysis, we removed microglial marker genes using the Hu\_Fetal\_Retinal\_Microglia geneset from MSigDB and ran an enrichment analysis using the SenMayo reduced gene panel. Once again Mic, Asc and MG scored high. (e) Heatmaps depicting the number (left) and strength (right) of interactions between SenMayo-hi cells and other cells in the mouse retina. (f) Bubble plot depicting significant pathways of interactions from SenMayo-hi cells to other retinal cells. (g) UMAP depicting the mouse retinal atlas from the Chen lab<sup>117</sup>. (h) UMAP depicting the SenMayo enrichment scores in the mouse retina atlas showed that glial cells scored high in this independent mouse retinal dataset. (i) SenMayo enrichment score (ES) distribution in the mouse retinal atlas by cell type. (j) SenMayo reduced panel enrichment analysis using the mouse retina atlas once again showed that the glial cells were the highest scorers.

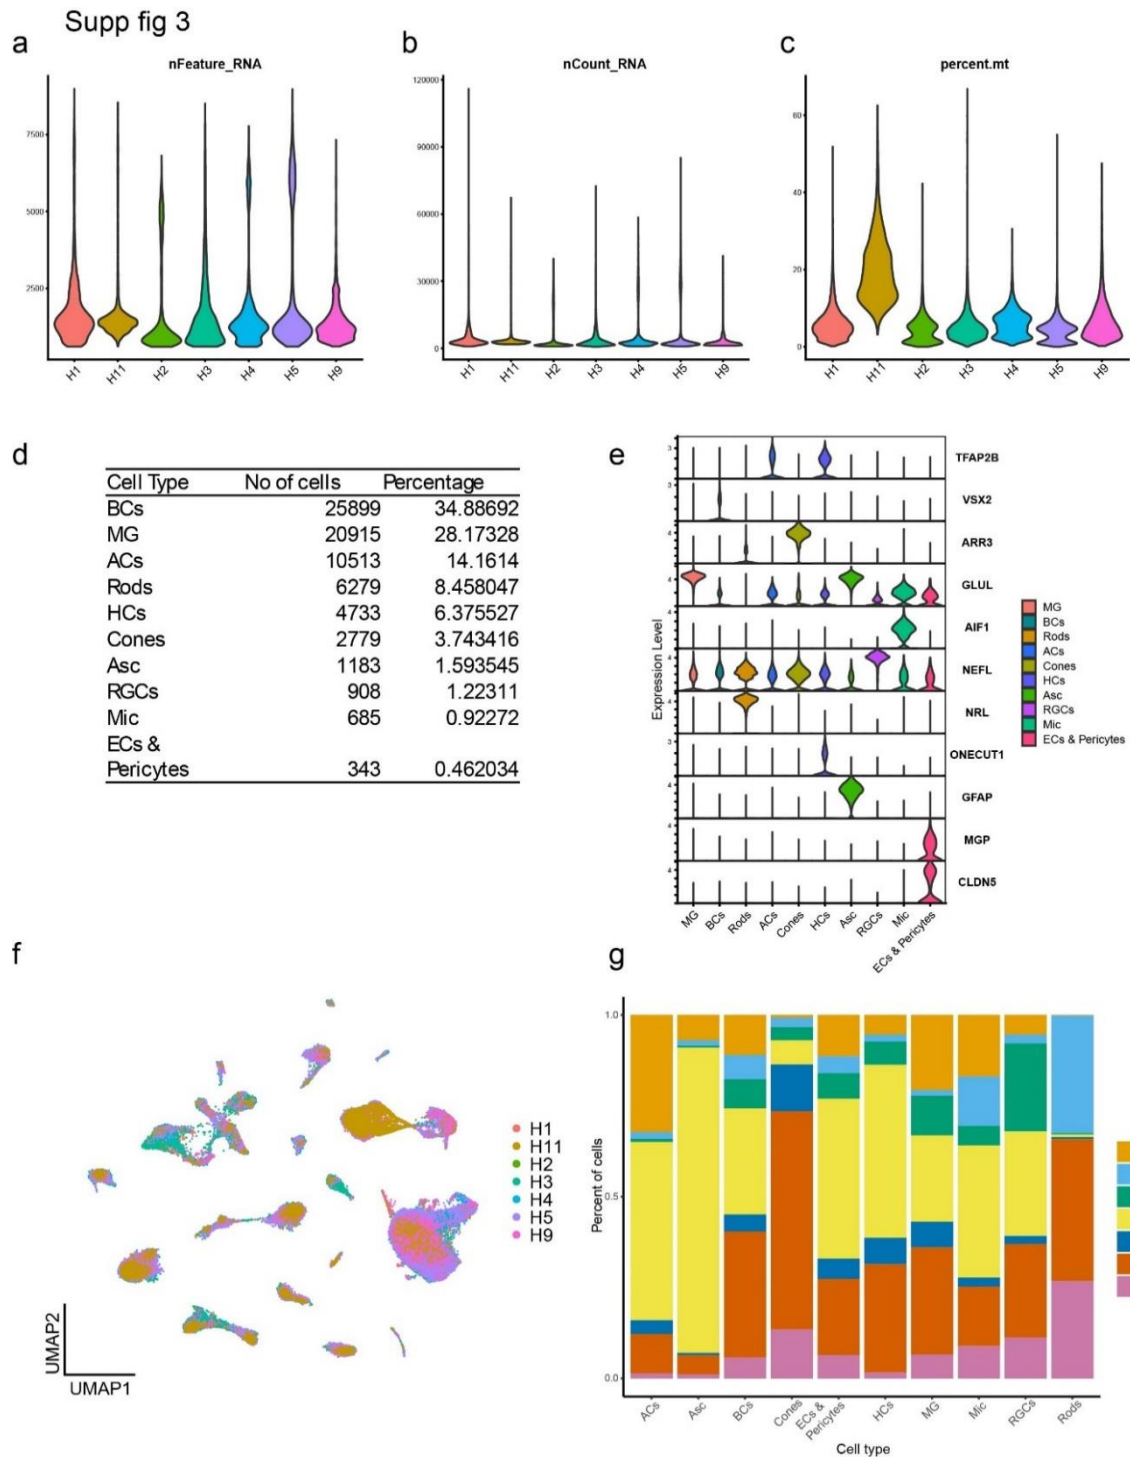

**Supplementary fig 3: QC data for human retinal scRNA dataset:** (a-c) Violin plots depicting (a) genes, (b) Unique molecular identifiers (UMIs) and (c) percentage of mitochondrial genes detected per cell per sample in the human retinal dataset. (d) Table depicting number of cells detected per cell type. (e) Violin plots depicting marker gene expression of the different cell type detected. (f) UMAP plot depicting the sample wise distribution of the cells detected following Seurat integration. (g) Proportion plot depicting the contribution of the different samples to various cell types. Note that this distribution is not even due to the fact that different samples were taken from different parts of the retina with varying cell type distribution.

Supp fig 4

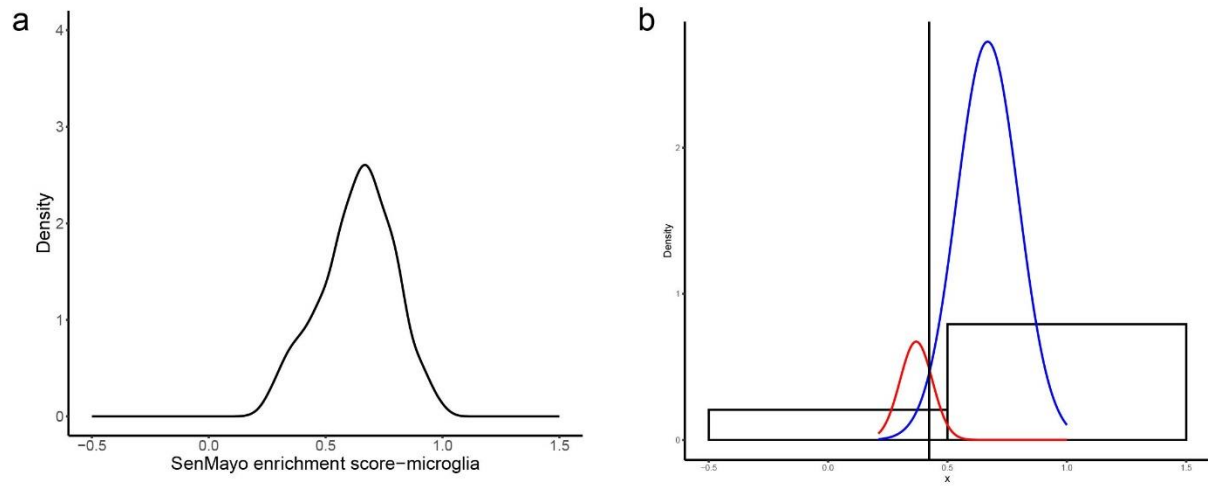

**Supplementary fig 4: Method of determining SenMayo-hi cells in the human retinal dataset:** (a) Microglia (Mic) subcluster which scored highest for SenMayo enrichment was used to set the threshold for SenMayo-hi cells. (b) The R package mixtools was used to set the threshold and cells that scored higher were labelled SenMayo-hi and those that scored lower were labelled SenMayo-low cells.

Supp fig 5

a Top enriched pathways:  
SenMayo-hi human astrocytes

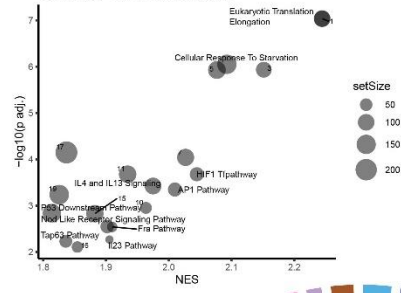

b

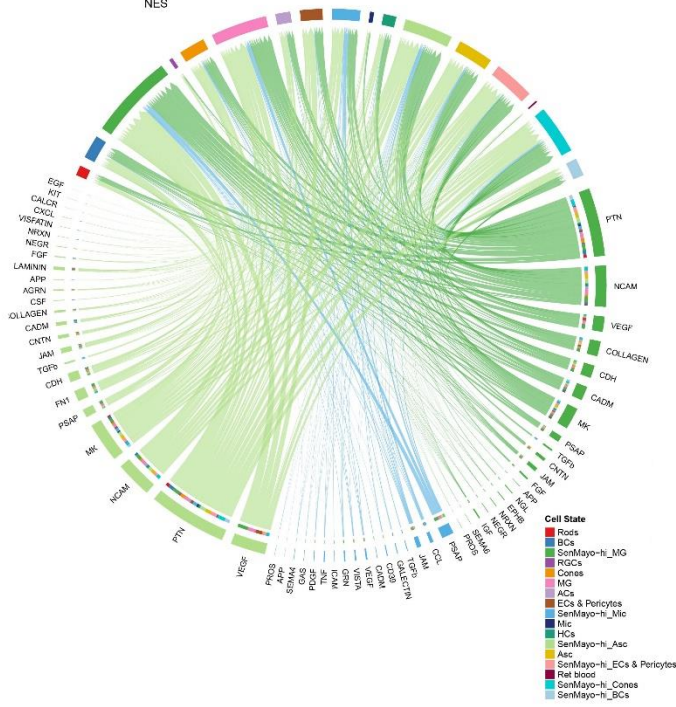

Supp fig 5

c

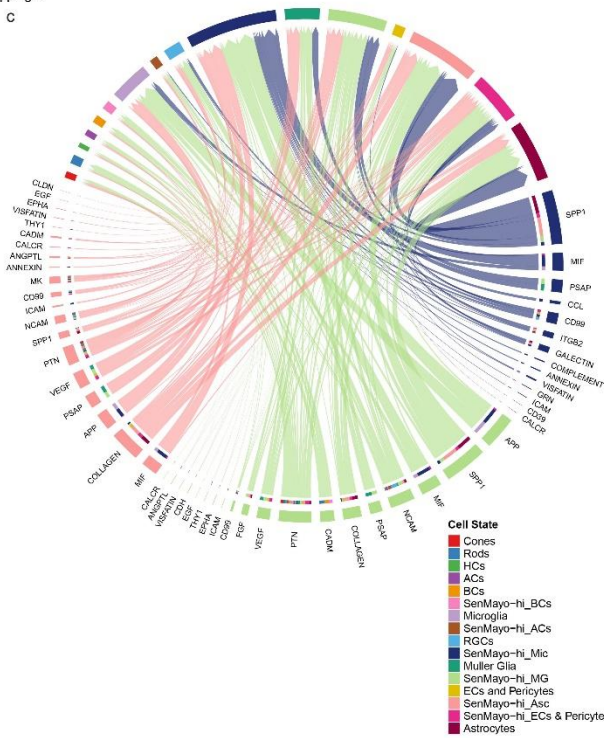

Supp fig 5

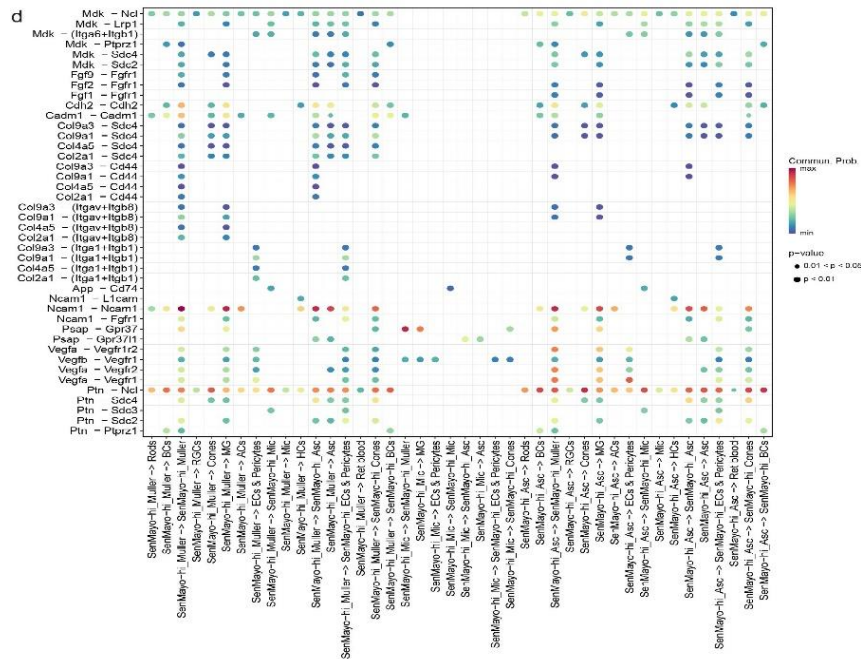

Supp fig 5

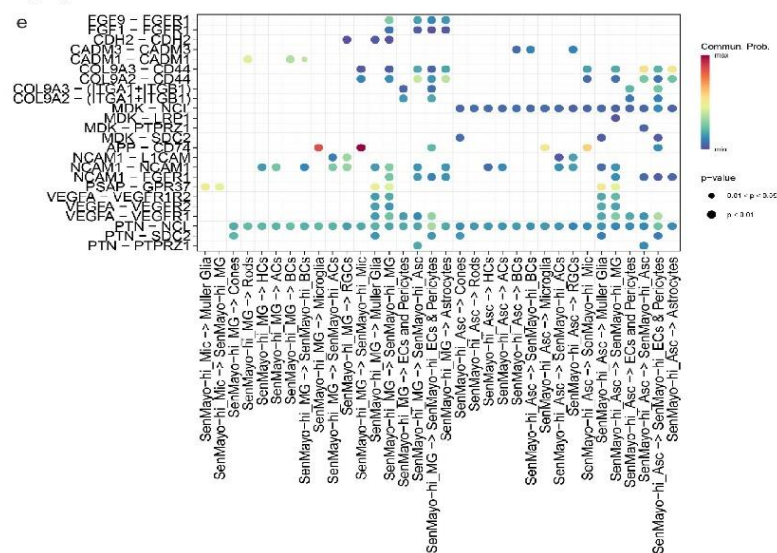

**Supplementary fig 5: Comparison of mouse and human SenMayo-hi glial cells:** (a) Dotplot of the enriched pathways identified in SenMayo-hi human astrocytes (FDR < 0.01). See Supp table 7c for full list. (b, c) Pathway analysis indicates that PTN, NCAM, VEGF, PSAP, APP, COLLAGEN are among pathways of interaction from SenMayo-hi cells to other retina cells that are conserved in human (c) and mouse (b) retina. (d, e) L-R (Ligand-Receptor) interactions depicting these pathways from SenMayo-hi cells to other retinal cell types in (d) mouse and (e) human datasets.



Supp fig 6

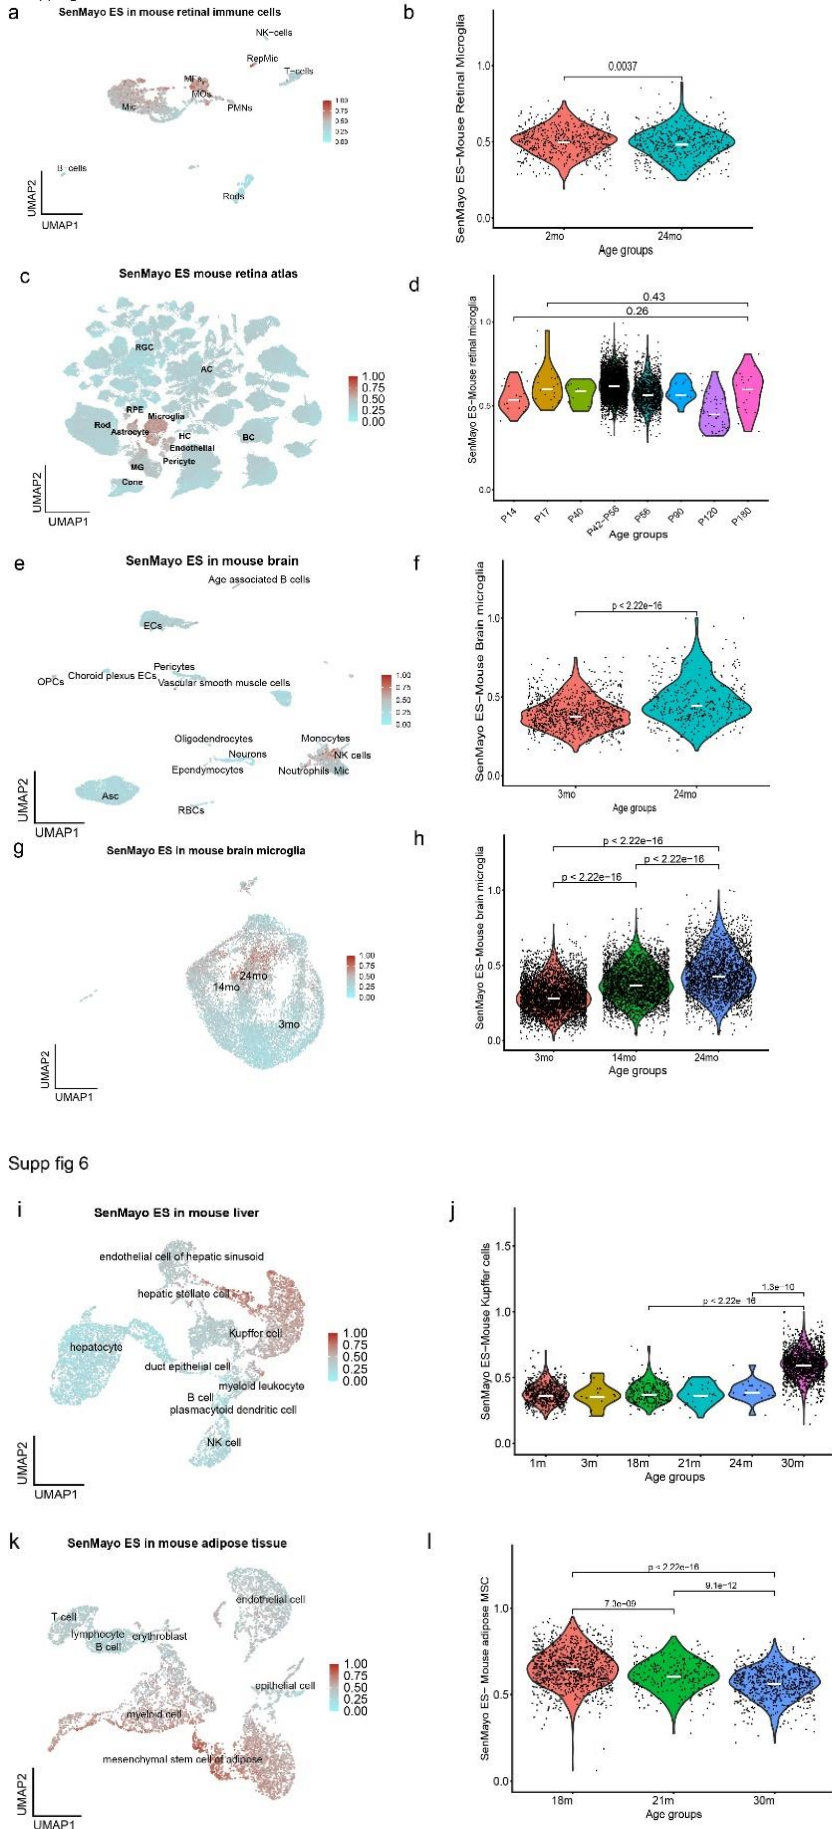

Supp fig 6

**Supplementary fig 6 : SenMayo panel enrichment with age in retinal and non-retinal tissues:** (a) UMAP plot of mouse retinal immune cells (GSE: GSE195891) from the Saban lab<sup>116</sup> showing SenMayo enrichment scores and microglia are among the highest scorers. (b) No trend of SenMayo score with age is observed in retinal microglia, as observed in our dataset. (c) UMAP plot of the mouse retinal atlas from the Chen lab<sup>117</sup> showing SenMayo enrichment scores where glial cells are among the top scorers. (d) Once again, no trend of SenMayo scores with age is observed in mouse retinal microglia. (e) UMAP plot of mouse brain samples (GEO: GSE208292) from the Peng<sup>119</sup> lab, showing SenMayo enrichment scores (ES) and microglia are among the highest scoring cell types. (f) Increased expression of SenMayo score with age in brain microglia (2-mo vs 24-mo) (g) UMAP plot depicting ageing mouse brain microglia samples (GEO:GSE207932) from the Peng<sup>119</sup> lab, showing SenMayo enrichment scores (h) Increased expression of SenMayo scores with age is observed in this independent ageing series (3-, 14-, 24-mo) of mouse brain microglia. (i) UMAP plot of mouse liver<sup>118</sup> showing SenMayo enrichment scores with Kupffer cells scoring highest. (j) Increased SenMayo scores with age in mouse Kupffer cells with age, with the significant increase in scores from 24mo to 30mo. (k) UMAP plot of mouse adipose tissue<sup>118</sup> showing SenMayo enrichment scores with mesenchymal stem cells (MSCs) of adipose scoring the highest. (l) Significant decrease in the SenMayo enrichment scores observed with age in MSCs of adipose.

Supp fig 7

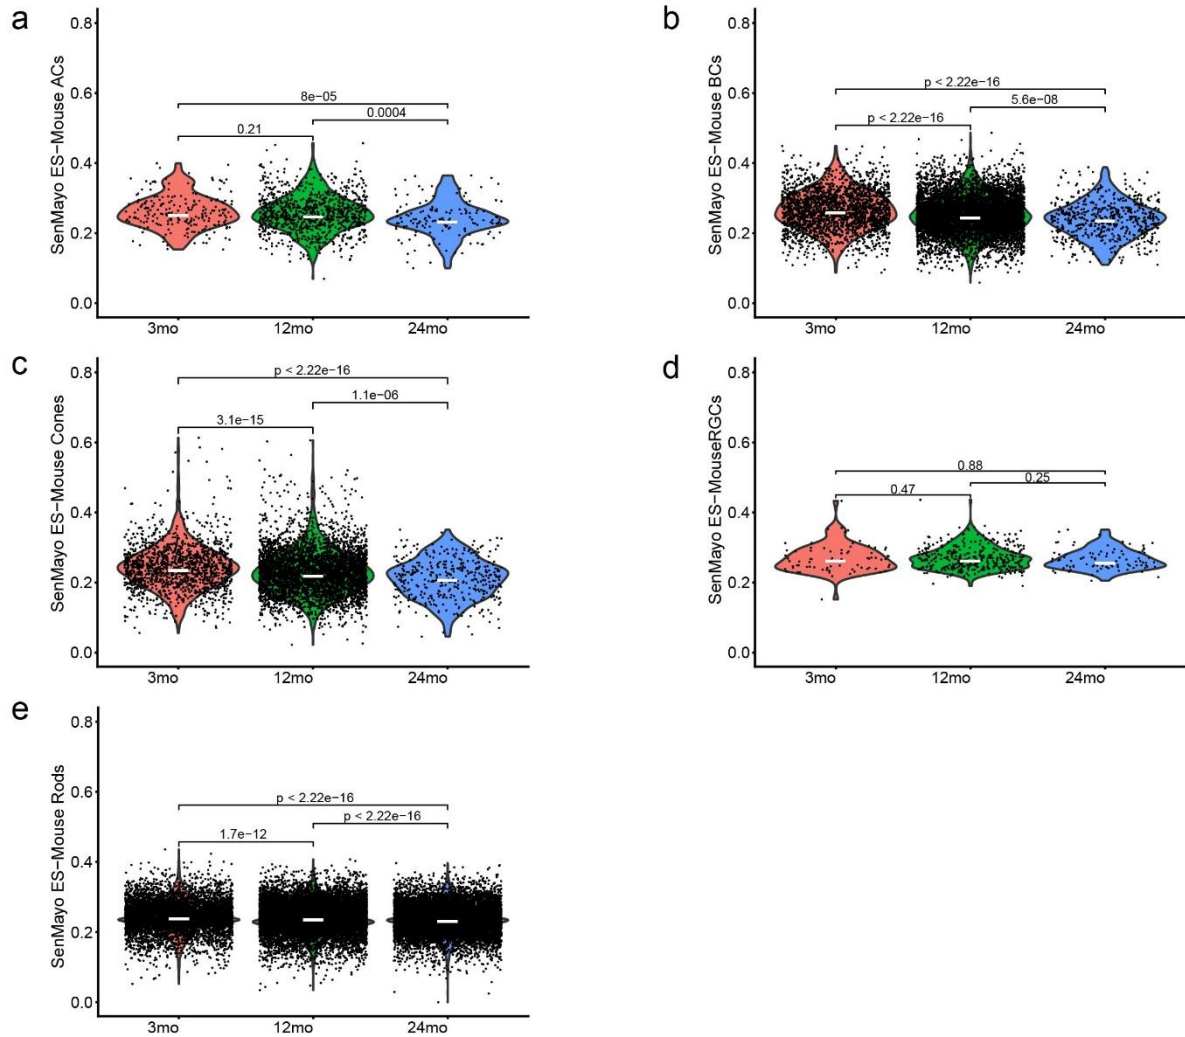

**Supplementary fig 7: SenMayo scores in mouse retinal neurons across age:** There was no increase in SenMayo score observed with age in mouse retinal neurons that were identified such as (a) Amacrine cells, (b) Bipolar cells, (c) cone photoreceptors, (d) Retinal ganglion cells (RGCs) and (e) rod photoreceptors.

Supp fig 8

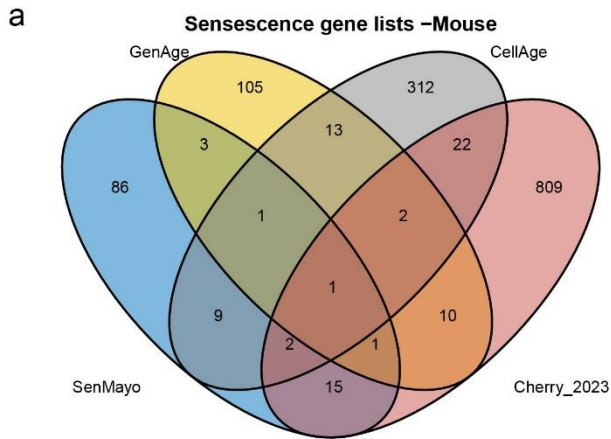

| Gene list-mouse | No of unique genes | Total no of genes | Percentage of unique genes |
|-----------------|--------------------|-------------------|----------------------------|
| SenMayo         | 86                 | 118               | 72.9                       |
| GenAge          | 105                | 136               | 77.2                       |
| CellAge         | 312                | 362               | 86.2                       |
| Cherry_2023     | 809                | 862               | 93.9                       |

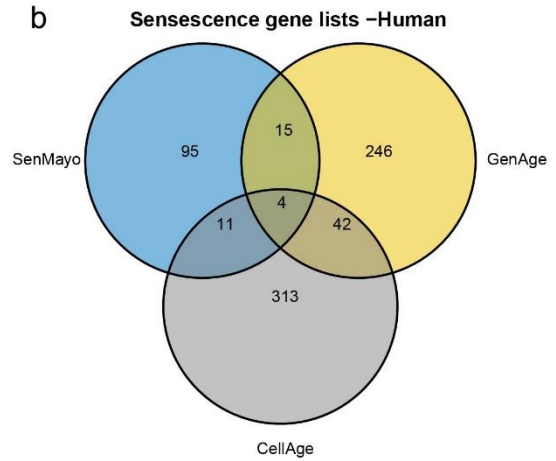

| Gene list-human | No of unique genes | Total no of genes | Percentage of unique genes |
|-----------------|--------------------|-------------------|----------------------------|
| SenMayo         | 95                 | 125               | 76                         |
| GenAge          | 246                | 307               | 80.1                       |
| CellAge         | 313                | 370               | 84.6                       |

**Supplementary fig 8: Overlap of genes in the various senescence related gene lists used for analysis:** (a & b) Venn diagram showing the overlap of genes in the various senescence/ageing gene lists used for the (a) mouse retinal dataset (b) human retinal dataset.

## List of supplementary tables

**Supplementary table 1:** Markers used to annotate retinal cell types

**Supplementary table 2:** Senescence, ageing gene and other gene lists used in the study

**Supplementary table 3:** Top 50 differentially expressed genes- mouse retinal microglia - SenMayo-hi vs SenMayo-low (p-val adj < 0.01)

**Supplementary table 4a:** Mouse retinal microglia-SenMayo-hi vs SenMayo-low –GSEA GO: BP – top 50 terms

**Supplementary table 4b:** Mouse retinal microglia-SenMayo-hi vs SenMayo-low –GSEA pathway enrichment terms – top 50 terms

**Supplementary table 5:** Top 50 differentially expressed genes- mouse retinal Mueller glia - SenMayo-hi vs SenMayo-low (p-val-adj < 0.01)

**Supplementary table 6a:** Mouse retinal Mueller glia-SenMayo-hi vs SenMayo-low – GSEA GO: BP – top 50 terms

**Supplementary table 6b:** Mouse retinal Mueller glia-SenMayo-hi vs SenMayo-low – GSEA pathway enrichment terms – top 50 terms

**Supplementary table 7a:** Human retinal microglia-SenMayo-hi vs SenMayo-low –GSEA pathway enrichment terms – top 30 terms

**Supplementary table 7b:** Human retinal Mueller glia-SenMayo-hi vs SenMayo-low –GSEA pathway enrichment terms – top 30 terms

**Supplementary table 7c:** Human retinal astrocytes-SenMayo-hi vs SenMayo-low –GSEA pathway enrichment terms – top 30 terms

**Supplementary table 8a:** DEG list for mouse Mueller glia: 12-mo vs 3-mo (p-val-adj < 0.01, |LFC| > 0.25, top 25 up and downregulated)

**Supplementary table 8b:** DEG list for mouse Mueller glia: 24-mo vs 3-mo (p-val-adj < 0.01, |LFC| > 0.25, top 25 up and downregulated)

**Supplementary table 8c:** IPA canonical pathway- comparison analysis for mouse Mueller Glia (p-value < 0.05)

**Supplementary table 9a:** DEG list for mouse Rod photoreceptors: 12-mo vs 3-mo (p-val-adj < 0.01, |LFC| > 0.25, top 25 up and downregulated)

**Supplementary table 9b:** DEG list for mouse Rod photoreceptors: 24-mo vs 3-mo (p-val-adj < 0.01, |LFC| > 0.25, top 25 up and downregulated)

**Supplementary table 9c:** IPA canonical pathway- comparison analysis for mouse Rod photoreceptors (p-value < 0.05)

**Supplementary table 10a:** DEG list for mouse Cone photoreceptors: 12-mo vs 3-mo (p-val-adj < 0.01, |LFC| > 0.25, top 25 up and downregulated)

**Supplementary table 10b:** DEG list for mouse Cone photoreceptors: 24-mo vs 3-mo (p-val-adj < 0.01, |LFC| > 0.25, top 25 up and downregulated)

**Supplementary table 10c:** IPA canonical pathway- comparison analysis for mouse Cone photoreceptors (p-value < 0.05)

**Supplementary table 11a:** DEG list for mouse Bipolar cells: 12-mo vs 3-mo (p-val-adj < 0.01, |LFC| > 0.25, top 25 up and downregulated)

**Supplementary table 11b:** DEG list for mouse Bipolar cells: 24-mo vs 3-mo (p-val-adj < 0.01, |LFC| > 0.25, top 25 up and downregulated)

**Supplementary table 11c:** IPA canonical pathway- comparison analysis for mouse Bipolar cells (p-value < 0.05)

**Supplementary table 12:** Mouse retinal microglia- Saban lab dataset (GSE195891) - SenMayo-hi vs SenMayo-low –GSEA pathway enrichment terms (FDR-q-value < 0.05, NES > 1.5)

**Supplementary table 13a:** Mouse retinal microglia-SenMayo-hi vs SenMayo-low –Top 50 GSEA pathway enrichment terms obtained after removing the microglial activation genes (Marsh et al, 2022) from the input gene list (FDR-q-value < 0.05, NES > 1.5)

**Supplementary table 13b:** Human retinal microglia- (GSE148077) -SenMayo-hi vs SenMayo-low –GSEA pathway enrichment terms obtained after removing the microglial activation genes (Marsh et al, 2022) from the input gene list (FDR-q-value < 0.05, NES > 1.5)

**Supplementary table 13c:** Mouse retinal microglia- Saban lab dataset (GSE195891) - SenMayo-hi vs SenMayo-low –GSEA pathway enrichment terms obtained after removing the microglial activation genes (Marsh et al, 2022) from the input gene list (FDR-q-value < 0.05, NES > 1.5)

**Supplementary table 1: Markers used to annotate retinal cell types (From Peng et al., 2019 and Yan et al., 2020)**

| Cell type         | Marker genes                                                       |
|-------------------|--------------------------------------------------------------------|
| Rods              | Rho,Pdc,Nrl,Sag,Gnat1,Gngt1,Nr2e3,Gnb1                             |
| Cones             | Arr3,Rcvrn,Gnat2,Gngt2,Opn1sw,Opn1mw,Pde6h,Guca1a,Opn1lw           |
| Bipolar cells     | Vsx2, Otx2, Grm6, Prkca, Trpm1, Grik1, Vsx1,Cabp5                  |
| RGCs              | Rbpms, Pou4f1, Pou4f2, Thy1, Slc17a6,Nefl, Nefm, Sncg, Pou4f3      |
| Amacrine cells    | Tfap2a, Tfap2b, Tfap2c, Gad1, Gad2, Slc6a9, C1ql1,C1ql2            |
| Horizontal cells  | Lhx1,Onecut1,Onecut2,Calb1                                         |
| Endothelial cells | Cldn5,Igfbp7,Col4a1                                                |
| Pericytes         | Mgp,Kcnj8,My19, Col4a1, Rgc5                                       |
| Microglia         | C1qa,C1qb, C1qc, Hexb, Ctss, P2ry12, Tmem119,B2m                   |
| Mueller glia      | Rlbp1,Glul, Apoe, Crabp1, Clu, Slc1a3,Dkk3, Crym                   |
| Astrocytes        | Gfap,Sod3,Gypc, Gsn, Hlpa, Cd44, Sparcl1,Mgst1,Emp1, Mt3,Adm,Anxa1 |

**Supplementary table 2: Senescence and ageing gene lists used in the study**

|                                                 |                                                                                                                                                                                                                                                                                                                                                                                                                                                                                                                                                                                                                                                                                                                                                                                                                                                                                                                                                                                                                                                               |
|-------------------------------------------------|---------------------------------------------------------------------------------------------------------------------------------------------------------------------------------------------------------------------------------------------------------------------------------------------------------------------------------------------------------------------------------------------------------------------------------------------------------------------------------------------------------------------------------------------------------------------------------------------------------------------------------------------------------------------------------------------------------------------------------------------------------------------------------------------------------------------------------------------------------------------------------------------------------------------------------------------------------------------------------------------------------------------------------------------------------------|
| <b>SenMayo mouse (Saul et al., 2023)</b>        | <i>Acvr1b, Ang, Angpt1, Angptl4, Areg, Axl, Bex3, Bmp2, Bmp6, C3, Ccl1, Ccl2, Ccl20, Ccl24, Ccl26, Ccl3, Ccl4, Ccl5, Ccl7, Ccl8, Cd55, Cd9, Csf1, Csf2, Csf2rb, Cst10, Cttnb1, Ctsb, Cxcl1, Cxcl10, Cxcl12, Cxcl16, Cxcl2, Cxcl3, Cxcr2, Dkk1, Edn1, Egf, Egfr, Ereg, Esm1, Ets2, Fas, Fgf1, Fgf2, Fgf7, Gdf15, Gem, Gmfg, Hgf, Hmgb1, Icam1, Icam5, Igf1, Igfbp1, Igfbp2, Igfbp3, Igfbp4, Igfbp5, Igfbp6, Igfbp7, Il10, Il13, Il15, Il18, Il1a, Il1b, Il2, Il6, Il6st, Il7, Inha, Iqgap2, Itga2, Itpka, Jun, Kitl, Lcp1, Mif, Mmp13, Mmp10, Mmp12, Mmp14, Mmp2, Mmp3, Mmp9, Nap114, Nrg1, Pappa, Pecam1, Pgf, Pigf, Plat, Plau, Plaur, Ptbp1, Ptger2, Ptges, Rps6ka5, Scamp4, Selplg, Sema3f, Serpinb3a, Serpine1, Serpine2, Spp1, Spx, Timp2, Tnf, Tnfrsf11b, Tnfrsf1a, Tnfrsf1b, Tubgcp2, Vegfa, Vegfc, Vgf, Wnt16, Wnt2</i>                                                                                                                                                                                                                               |
| <b>SenMayo-human (Saul et al., 2023)</b>        | ACVR1B, ANG, ANGPT1, ANGPTL4, AREG, AXL, BEX3, BMP2, BMP6, C3, CCL1, CCL13, CCL16, CCL2, CCL20, CCL24, CCL26, CCL3, CCL3L1, CCL4, CCL5, CCL7, CCL8, CD55, CD9, CSF1, CSF2, CSF2RB, CST4, CTNBN1, CTSB, CXCL1, CXCL10, CXCL12, CXCL16, CXCL2, CXCL3, CXCL8, CXCR2, DKK1, EDN1, EGF, EGFR, EREG, ESM1, ETS2, FAS, FGF1, FGF2, FGF7, GDF15, GEM, GMFG, HGF, HMGB1, ICAM1, ICAM3, IGF1, IGFBP1, IGFBP2, IGFBP3, IGFBP4, IGFBP5, IGFBP6, IGFBP7, IL10, IL13, IL15, IL18, IL1A, IL1B, IL2, IL32, IL6, IL6ST, IL7, INHA, IQGAP2, ITGA2, ITPKA, JUN, KITLG, LCP1, MIF, MMP1, MMP10, MMP12, MMP13, MMP14, MMP2, MMP3, MMP9, NAP1L4, NRG1, PAPP, PECAM1, PGF, PIGF, PLAT, PLAU, PLAUR, PTBP1, PTGER2, PTGES, RPS6KA5, SCAMP4, SELPLG, SEMA3F, SERPINB4, SERPINE1, SERPINE2, SPP1, SPX, TIMP2, TNF, TNFRSF10C, TNFRSF11B, TNFRSF1A, TNFRSF1B, TUBGCP2, VEGFA, VEGFC, VGF, WNT16, WNT2                                                                                                                                                                                    |
| <b>GenAge-mouse (de Magalhaes et al., 2009)</b> | <i>Adcy5, Adra1a, Adra1b, Agr1a, Akt1, Akt2, Apoe, Arhgap1, Arntl, Atg5, Atm, Atr, Bax, Brcal, Bub1b, Bub3, Casp2, Cat, Cav1, Cdc14b, Cdk7, Cdkn1a, Cebpa, Cebpb, Chek2, Cisd2, Clock, Coll1a1, Coq7, Ctfl, Dgat1, Dmd, Eef1e1, Efemp1, Eif5a2, Eps8, Ercc1, Ercc2, Ercc4, Fgf21, Fgf23, Fn1, Foxm1, Fxn, G6PD, Gdf15, Gh, Ghr, Ghrh, Ghrhr, GMFB, Gpx4, Grn, Gsk3a, Gsta4, Hells, Hnrnpd, Htr1b, Htra2, Hit, Igf1, Igf1r, Ikbkb, Insr, Irs1, Irs2, Jund, Kcna3, Kl, Lmna, Mcm2, Mgat5, Mif, Mir17, Mir29a, Msh2, Msra, Mstn, Mt1, Mtbp, Mtor, Myc, Ncor2, Neil1, Nfkb1, Nos3, NUDT1, Pappa, Parp1, Pawr, Pck1, Per2, Plau, Polg, Pou1f1, Pparg, Ppm1d, Prdx1, Prkar2b, Prop1, Pten, Rael, Rbm38, Rictor, Rps6kb1, Serpine1, Shc1, Siglece, Sirt1, Sirt6, Sirt7, Slc13a1, Slc25a4, Soes2, Sod2, SOD3, Sqstm1, Stub1, Surf1, Terf2, Tert, Top3b, Topors, Tpp2, Trp53, Trp53bp1, Trp63, Trp73, Trpv1, Txnl, Ubd, Ucp2, Xpa, Xrcc5, Xrcc6, Zmpste24</i>                                                                                                          |
| <b>GenAge-human (de Magalhaes et al., 2009)</b> | GHR, GHRH, SHC1, POU1F1, PROP1, TP53, TERC, TERT, ATM, PLAU, ERCC2, ERCC8, WRN, LMNA, IGF1R, TXN, KL, E2F1, PTPN11, NFKB2, STAT5B, STAT3, STAT5A, NRG1, HDAC3, GH1, IL7R, IGF1, IGF2, INS, NGF, IRS1, PTPN1, IRS2, AKT1, PIK3CB, NGFR, HRAS, MYC, EGFR, ERBB2, INSR, NCOR1, NBN, JUND, IL2, PDGFB, EGF, IL2RG, FOS, PDGFRB, EPOR, SST, PRKCD, PPARA, RET, PLCG2, PEX5, TCF3, PARP1, BRCA1, PIN1, PTEN, CREBBP, HIF1A, UBB, RPA1, BLM, BCL2, S100B, VCP, POLG, IGFBP3, HSP90AA1, NR3C1, EGR1, VEGFA, ABL1, BRCA2, TOP2A, TOP2B, NFKB1, TOP1, RAD51, UBE2I, TNF, PDPK1, CEBPA, CEBPB, MX11, TGFB1, ERCC6, STK11, EP300, APTX, PML, GSK3B, HTT, PRKCA, SSTR3, HELLS, APOC3, EEF2, ERCC3, TERF1, PRKDC, CAT, ERCC5, AR, GTF2H2, XRCC5, PCNA, FEN1, FAS, TERF2, XRCC6, POLD1, BAX, , RB1, EMD, GRB2, FOXO3, FOXO1, HSF1, XPA, MSRA, RECQL4, SOD2, SOD1, FOXM1, COQ7, CACNA1A, LRP2, AIFM1, UCHL1, APP, APOE, A2M, SNCG, PRDX1, PON1, RELA, IL6, RGN, ATP5O, RAD52, TOP3B, ERCC1, SIRT1, HDAC1, HSPA9, GPX1, GSR, GSS, GSTA4, GSTP1, MT-COI, HSPD1, HSPA1A, HSPA1B, |

|                                                 |                                                                                                                                                                                                                                                                                                                                                                                                                                                                                                                                                                                                                                                                                                                                                                                                                                                                                                                                                                                                                                                                                                                                                                                                                                                                                                                                                                                                                                                                                                                                                                                                                                                                                                                                                                                                                                                                                                                                                                                                                                                                                                                                                                                                                                                                                                                                                                                                                                                                                                                                                                                                                                                    |
|-------------------------------------------------|----------------------------------------------------------------------------------------------------------------------------------------------------------------------------------------------------------------------------------------------------------------------------------------------------------------------------------------------------------------------------------------------------------------------------------------------------------------------------------------------------------------------------------------------------------------------------------------------------------------------------------------------------------------------------------------------------------------------------------------------------------------------------------------------------------------------------------------------------------------------------------------------------------------------------------------------------------------------------------------------------------------------------------------------------------------------------------------------------------------------------------------------------------------------------------------------------------------------------------------------------------------------------------------------------------------------------------------------------------------------------------------------------------------------------------------------------------------------------------------------------------------------------------------------------------------------------------------------------------------------------------------------------------------------------------------------------------------------------------------------------------------------------------------------------------------------------------------------------------------------------------------------------------------------------------------------------------------------------------------------------------------------------------------------------------------------------------------------------------------------------------------------------------------------------------------------------------------------------------------------------------------------------------------------------------------------------------------------------------------------------------------------------------------------------------------------------------------------------------------------------------------------------------------------------------------------------------------------------------------------------------------------------|
|                                                 | <p>PCMT1, MAPK8, YWHAZ, PTK2B,PTK2, IL7, MAPK14, FGFR1, SP1, FLT1, JUN, MED1, MAPK9, MAPK3, HMGB1, CCNA2, HMGB2, MAP3K5, TAF1, LMNB1, SDHC, FOXO4, HESX1, PIK3R1, BSCL2, AGPAT2, BMI1, EEF1A1, TFAP2A, BDNF, CREB1, ATF2, TBP, APEX1, HBP1, BUB1B, PTGS2, HSPA8, SIN3A, CDK1, TFDP1, DDIT3, POLA1, MAPT, CTGF, HDAC2, MAX, MXD1, MDM2, SUMO1, H2AFX, HOXB7, HOXC4, JAK2, ESR1, LEP, LEPR, NFKBIA, CLU, MTOR, GHRHR, CTNNB1, PSEN1, DLL3, CDKN2A, PPP1CA, DBN1, NOG, ELN, ATR, UCP3, ZMPSTE24, TP63, UCP2, POLB, GCLC, GCLM, SIRT6, BUB3, RAE1, PMCH, MLH1, CSNK1E, STUB1, PPM1D, CHEK2, PCK1, ARHGAP1, CDC42, ARNTL, CLOCK, HIC1, PAPP, ADCY5, PPARGC1A, GPX4, UCP1, FGF23, EFEMP1, ERCC4, CETP, PPARG, AGTR1, CISD2, EEF1E1, EPS8, KCNA3, SIRT7, SLC13A1, SOCS2, TPP2, TP53BP1, SIRT3, NCOR2, SUN1, BAK1, IGFBP2, PYCR1, TP73, CNR1, NFE2L2, CDKN1A, PDGFRA, PIK3CA, IQA, CDKN2B, EIF5A2, MIF, DGAT1, MT1E, FGF21, HTRA2, GSK3A, NUDT1, IKBKB, SQSTM1, CDK7, GRN, SERPINE1, SPRTN, RICTOR, CTF1, TRAP1, TRPV1, NFE2L1, IFNB1, GDF11</p>                                                                                                                                                                                                                                                                                                                                                                                                                                                                                                                                                                                                                                                                                                                                                                                                                                                                                                                                                                                                                                                                                                                                                                                                                                                                                                                                                                                                                                                                                                                                                                                                           |
| <p><b>CellAge</b><br/>(Avelar et al., 2020)</p> | <p>AAK1, ABCB1, ABI3, ABI3BP, ACKR1, ADCK5, AGT, AHR, AKT1, ALOX15B, AR, ARF1, ARG2, ARID1A, ARID1B, ARID4B, ARPC1B, ARRB1, ASF1A, ASXL2, ATF6, ATG10, ATR, ATRAID, ATRX, ATXN10, AXL, BAP1, BCL2, BCL2L2, BCLAF1, BHLHE40, BIN1, BLK, BMP4, BMPR2, BNIP3L, BRAF, BRD7, BTG1, BTG2, CAPNS1, CARE, CASP2, CAV1, CAVIN1, CCL2, CCN2, CCN6, CCND1, CD34, CD82, CDC6, CDK18, CDK5, CDK5R1, CDKN1A, CDKN1B, CDKN1C, CDKN2A, CDKN2AIP, CDKN2B, CEACAM1, CEBPB, CHD5, CHEK1, CHEK2, CHUK, CKB, CLCA2, CPEB1, CREG1, CTNNB1, CXCL1, CXCR2, CYBB, DAO, DDB2, DHCR24, DHRS2, DCL1, DMTF1, DPP4, DUSP1, DYRK1A, E2F1, E2F7, EEF1E1, EGLN1, EGR2, EHF, EID3, EIF2AK2, ENG, ENTPD7, EP300, ERBB2, ERFF1, ERVW-1, ESRRB, ETS1, ETS2, ETV6, EWSR1, FANCD2, FASN, FASTK, FBXO22, FBXO31, FBXO4, FGFR1, FGFR3, FOXA1, FOXO1, FOXO4, FOXP3, GADD45G, GATA4, GDF15, GEMIN2, GJA1, GKN1, GNG11, GNMT, GRIK2, GRK4, GRK6, HBP1, HDAC1, HEPACAM, HIPK2, HIRA, HK3, HMGA1, HMGA2, HNRNPC, HOPX, HRAS, HSPA9, HTRA1, IFI16, IFNG, IGFBP1, IGFBP3, IGFBP5, IGFBP7, IKBKB, IL1A, IL1R1, IL6, ING1, ING2, ING5, IRF1, IRF3, IRF5, IRF7, ITGB3, ITGB4, ITPK1, ITPKB, ITPR1, ITPR2, ITPR3, ITSN2, JAK2, JUNB, KAT5, KCNA1, KDM6B, KEAP1, KLF4, KND1, LATS2, LAYN, LIMK1, LPAR1, LY6D, MAD1L1, MAP2K1, MAP2K2, MAP2K6, MAP2K7, MAP3K14, MAP3K5, MAP3K6, MAP3K7, MAPK1, MAPK12, MAPK14, MAPKAPK5, MARCKS, MAST1, MATK, MAVS, MCRS1, MCU, MDP1, MEN1, MEOX1, METTL14, MINK1, MME, MNX1, MOB3A, MORC3, MOS, MST1, MT1G, MVK, MVP, MXD4, NADK, NCAPH2, NDRG1, NDS2, NEK4, NF2, NFKBIA, NINJ1, NLRX1, NOLC1, NOTCH1, NOTCH3, NOX1, NOX4, NQO1, NRAS, NRSN2, NUA1, OGT, ORA1, OTX2, PAK2, PAK4, PBRM1, PCGF2, PDCD10, PDGFB, PDIK1L, PDPK1, PDZD2, PEA15, PEBP1, PEX19, PGR, PHB, PI4KB, PIK3R5, PIMI1, PIN1, PINX1, PITX1, PLA2G2A, PLA2R1, PML, PMVK, PNPT1, POU3F1, POU5F1, PPARG, PPP2R1A, PPP2R5A, PRKCD, PRKCH, PRKD1, PRODH, PROX1, PTGS2, PTTG1, PURB, RAF1, RAPIGAP, RARB, RASSF1, RASSF5, RB1, RBL1, RBL2, RBM38, RBP1, RBPJ, REL, RELB, RNASEL, ROMO1, RPL11, RPS14, RPS6KB1, RPTOR, RRP8, RTN4, RUNX1, SALL1, SELENBP1, SERPINB2, SERPINE1, SFN, SFRP1, SHAH1, SIK1, SIN3B, SLC13A3, SLC31A2, SLC5A2, SMAD1, SMAD3, SMAD5, SMARCB1, SMURF2, SOCS1, SOD2, SORBS2, SOX1, SOX2, SOX5, SP1, SPARC, SPI1, SPIN1, SPOP, SREBF1, SRSF1, SSX2, STAG2, STAT1, STAT3, STAT5A, STAT5B, STAT6, STK32C, STK4, STK40, SUMO2, SUMO3, SYK, TAGLN, TBPL1, TGFB1, TGFB3, TIGAR, TLR1, TLR2, TLR3, TMEM9B, TNFSF15, TOM1, TOP1, TOP3A, TP53, TP53BP1, TP53BP2, TP53INP1, TP63, TRIM28, TXNIP, TYK2, UBD1, ULK3, USP28, VCAN, VENTX, WIF1, WNT16, WNT5A, AFI1, XPO1, YPEL3, ZCCHC10, ZFP36</p> |
| <p><b>Cherry_2023</b> (Cherry et al., 23)</p>   | <p><i>Pfkl, Megf6, Tnfrsf10b, Tpm2, Tpm1, Myo1b, Ccdc9b, Myo1e, Snai1, Lrrc32, Rflnb, Glipr1, Pear1, Cyb5r3, Tcim, Cit, Acot7, Fscn1, Impdh1, Serpina3n, Ccn2, Bgn, Ednra, Spns2, Slpr1, Ptpn14, Emilin1, Vcam1, Cldn1, Sema3f, Myo1d, Lrrfip1, Bcl6b, Dend4a, Uck2, Ltc4s, Cd82, Slpi, Thbs4, Mmp9, Ulbp1, Itga1, Anxa8, Pld3, Ccnd2, Serpine2, Ank, Trp53inp1, Arhgef5, Notch3, Apold1, Ctsk, Chst11, Zbtb46, Fgd6, Myh9, Ckap4, Rab27a, Cemip2, Plekhg5, Palld, Mmp13, Lbh, Emcn, Mylk, Ddit4l, Col18a1, Plod1, Dusp6, Des, C5ar1, Timp1, Stk17b, Tmc6, Mmp19, Hmcn1, Tmem132a, 11-Sep, Jpt2, Piezo1, Cav1, Cybb, Trp53i11, Sncg, Csf1r, Cd109, Bhlhe41, Scarf2, Rasa3, Nrp2, Col24a1, Ccn3, Rin1, Pdia5, Brinp3, H1f2, Tgfb3, Efnb2, Stab1, Ugcg, Arhgdib, Plk2, Synpo, Serpina3g, Fhl2, Elk3, C77080, Rasd1, Gcnt2, Ugt1a7c, Sipa11l, Cthrc1, Piezo2, Ical, Prkacb, Eescr, Eda2r, Slc20a1, Ltbp2, Cd276, Capn6, Ednrb, Msrb3, Slpr3, Tmem132a, Ggta1, Vstm4, Plpp1, Ptpre, Nkain1, Pragl1, Runx1, Grem2, B4galt5, Cdh11, Vegfc, Qsox1, Tgfb1, Cxcl5, Sox18, Ets1, Dio2, Adgrl1, Flt1, Lama5, Inf2, Halr1, Adams9, Slc40a1, Ppp1r13l, Cacnb3, Plxnd1, Pecam1, Epha2, Tnn, Fam160a1, Susd6, Fli1, Adams4, Il27ra, Tjp2, Etl4, Cxcl12, Adgrf5, Ppic, Ptp4a3, Col12a1, Tmem98, Kifc3, Pmepa1, Tln2, F11r, Hp, Tubb2a, Cpxm1, Merlk, Ccl9, Kcnj15, Angptl4, Clqtuf3, Fads3, Kctd15, Selp, Acta2, Slc52a3, Igfbp7, Adams17, Slc39a13, Socs2, Apobec3, Sorcs2, Ngn2, Kalrn, Colgalt1, Slit2, Pde4d, Parm1, Slc15a3, Igfbp4, Plod3, Pdzn3, Fzd1, Plec, Mpeg1, Plekhh2, Cdk6, Gsr, Cd80, Nek6, Lgmn, Ppm1j, Mzp1l, Retreg1, Atxn1, Bfar, AU020206, Colecl2, Zmat3, Csf2rb2, Cda, Foxs1, Tinagl1, Col15a1, Pdgfrb, Esm1, Adarb1, Psrc1, Slc9a3r1, Notch1, Mcm2, Speg, Tie1, Plvap, Plxdc1, Itgb5, Pdgrl, Fat1, Map3k11, Mdk, Nectin2, Mafb, Ctsb, 4-Sep, Sh3pxd2a, Hey1, Ezr, Nab1, L3mbil3, Nr2f2, Extl3, Rcc2, Ajuba, Stmn2, Itga10, Fkbp10, Angpt2, Sfrp2, Rbp1, Cald1, Maged1, Gm42047, Nr5a2,</i></p>                                                                                                                                                                                                                                                                                                                                                                                                                                                                                                                                                                                                                                              |



|                                                                                                        |                                                                                                                                                                                                                                                                                                                                                                                                                                                                                                                                                                                                                                                                                                                                                                                                                                                                                                                                                                                                                                                                                                                                                                                                                                                                                                                                                                                                                                                                                                                                                                                                                                                                                                                                                                                                                                                                                                                                                                                                                                                                                                                                                                                                                                                                                                                                                                                                                                                                                                                                                                                                                                                                                                                                                                                                                                                                                                                                                                                                                                                                                                                                                                                                                                                                                                                                                                                                                                                                                                                                                                                                                                                                                                                                                                                                                                                                                                                                                                                                                                                                                                                                                                                                                                                                                                                                                                                                                                                                                                                                                                                                                                          |
|--------------------------------------------------------------------------------------------------------|------------------------------------------------------------------------------------------------------------------------------------------------------------------------------------------------------------------------------------------------------------------------------------------------------------------------------------------------------------------------------------------------------------------------------------------------------------------------------------------------------------------------------------------------------------------------------------------------------------------------------------------------------------------------------------------------------------------------------------------------------------------------------------------------------------------------------------------------------------------------------------------------------------------------------------------------------------------------------------------------------------------------------------------------------------------------------------------------------------------------------------------------------------------------------------------------------------------------------------------------------------------------------------------------------------------------------------------------------------------------------------------------------------------------------------------------------------------------------------------------------------------------------------------------------------------------------------------------------------------------------------------------------------------------------------------------------------------------------------------------------------------------------------------------------------------------------------------------------------------------------------------------------------------------------------------------------------------------------------------------------------------------------------------------------------------------------------------------------------------------------------------------------------------------------------------------------------------------------------------------------------------------------------------------------------------------------------------------------------------------------------------------------------------------------------------------------------------------------------------------------------------------------------------------------------------------------------------------------------------------------------------------------------------------------------------------------------------------------------------------------------------------------------------------------------------------------------------------------------------------------------------------------------------------------------------------------------------------------------------------------------------------------------------------------------------------------------------------------------------------------------------------------------------------------------------------------------------------------------------------------------------------------------------------------------------------------------------------------------------------------------------------------------------------------------------------------------------------------------------------------------------------------------------------------------------------------------------------------------------------------------------------------------------------------------------------------------------------------------------------------------------------------------------------------------------------------------------------------------------------------------------------------------------------------------------------------------------------------------------------------------------------------------------------------------------------------------------------------------------------------------------------------------------------------------------------------------------------------------------------------------------------------------------------------------------------------------------------------------------------------------------------------------------------------------------------------------------------------------------------------------------------------------------------------------------------------------------------------------------------------------------|
|                                                                                                        | <p><i>Fuca2, H2bc4, Rrm2, Cyp7b1, Laptm5, Pkig, Col7a1, Crtap, Lman1, Cdh3, Ctsa, Dkk3, Fbln7, Sh3bgrl2, Actr1b, Clec11a, Htr2b, Eno1, Saa3, Olfml3, Il34, Ptprb, Fry, Ctsd, Itgb11, Pla2g7, Arhgef7, Nupr1, Rnf150, Adam12, Rfn1, Adgre5, Ubash3b, Znrfl, Gmppb, Plscr3, Plpp2, App, Ak1, Ormdl3, Gpr68, Clqb, Chsy1, P3h1, Creld2, Plaata3, Kctd11, Pmaip1, Nrarp, Slc39a1, BC028528, Iptr3, Hif1a, Scap, Rgs16, P3h2, Scube3, Frem1, Phactr1, Nudt4, Lxn, Spon1, Epp4114a, Cnn2, Nt5dc2, Hdlbp, Mex3a, Rasal2, Kcid10, Cdk1, Aplp1, Prss35, Rarres1, Fzd2, Parvb, Creb311, Tor4a, Bcr, Trim46, Ano1, Pofut2, Rpn1, Adra2a, Plxna4, Flt4, Hc, Nlrc3, Tspan11, Rasgrp4, Tsc22d1, Bok, Man2b1, Ryk, Clca3a1, Foxc2, Stra6, Gm9889, Bpgm, Wls, Tpd52, Foxf1, Gpr107, Avpr1a, Clqa, Myh11, Pdga, Chst15, Rasgrf2, Gucy1a1, Rcn1, Acpp, Add2, Zfp608, Tcea9, Cdy12, Kdelr2, Edil3, Reg3g, Runx2, Serpinb2, Fabp5, Mmp15, Pawr, Gm13889, Traf1, Pltp, Copz2, Sigmar1, Arl1, Clec7a, P4ha1, Lyz2, Chil1, Ptprv, Dnajb11, Par6g, A1506816, Dio3, Pik3r3, Slc9a3r2, Etv6, Serpinb9, B4galnt1, Fkbp5, Neur11b, Cmpk1, Clqc, Zswim4, P3h3, Lrrc59, Gng2, Mareks11, Col6a4, Lclatl, Zfp46, Hs6st1, Atp6v0d2, Top2a, Ssr2, Rnf125, Bak1, Dock5, Phc2, Jph2, Jak3, Serpinh1, Myo1c, Slc35a2, P2rx7, F2r13, Nr2f6, Chd7, Ass1, Fibin, Unc119, Atp6v0a2, Cgref1, Xpnpep1, Slc38a10, Calr, Praf2, Cpe, Adams6, Adams18, Efna1, Ctrl, Ahr, Pf4, Gm48878, B4galnt7, Trib2, Aldh1l2, Furin, Cpxm2, Herc3, Traf2, St6galnac4, Pcypl1, Mts1, Ctmbl1, Tmem268, Gas2, Dcald, Mpp2, Sfrp1, Dysf, Ifi20, Gna12, Cdkn2b, Fam217b, Slc10a7, Nfe211, Hdac9, Tspan17, Ncs1, Ccng1, Gent4, Prkar2b, Plcg2, Myzap, Clcf1, Pcdhgc5, Fgfr3, cfad, , A930004D18Rik, Itpril2, Tmem86a, Cep170b, Abhd2, Azin2, Rtn4r12, Lrig3, Pdia4, Hs2st1, Gas6, Tiam2, Ucp2, 2410131K14Rik, Tnfrsf21, Cripl1, Cd300a, Nmt1, Ctmbl1, Tmem268, Prickle1, Inhba, Ereg, Sesn2, Btk, Dab2ip, Scn1b, Gdpgp1, Ost4, Slc16a3, Ushbp1, Rgcc, Unc5c, Bace1, Mcam, Pigs, H2aj, Rasgrf1, Gpr176, Cav2, Grsf1, Layn, Chl1, Coll1a1, Nfkbid, Nhs12, Lrrc15, Specc1, Fcgr1, Amn, Gsto1, Rhod, Vwf, Twf1, Mthfd2, Evl, Rnf152, Mark4, Tmem189, Ighm, Mthfr, 5031439G07Rik, Map4k4, Syng2, Chpf2, Prdm1, Suf4, Ms4a4a, Mmp8, Ubid1, Rasgef1b, Arg1, Fnbp1, Hspb6, Ripor3, Evalb, Cfh, Fjx1, Acvr1, Cryz12, Prelid1, Tmem44, Dnajc25, Sox4, Fam102a, Cep85, Clqnf12, Pilra, Fbn2, Gns, Prkcsb, Mdfic, Wdfy4, Kctd5, Slc9a5, 4921524J17Rik, Mlec, Scn4b, Incepn, Hopx, B4galnt6, Pgk1, Dram1, Vmp1, Zfp809, Lrfin4, Commd9, Yap1, Cenpb, Olfr810, Lipa, Coll1a2, Gapdh, Cdkn1a, Fam110b, Enpp1, Ppp4r1, Mfap4, Chst2, Igsf3, Fnbp11, Frrs1, Emilin3, Bcl2l11, Gja5, Ccr12, Yipf5, Mfge8, Cpz, Ptk2b, Tbc1d2, Plod2, BC004004, Cdh5, Coll1a2, Kdelr1, Mif, Ctnn, Cd79a, Cdh23, Mical3, Ager, Entpd5, Inpp1, Col8a2, Aebp1, Eps812, Lzts1, Kctd17, Cldn5, Hexa, Plxn2, Smox, Ripk3, Exoc3l2, Bic1, Lhfp, Mboat1, Zbtb34, Col27a1, Tmem176b, Otulinl, Xrcc6, Neln, Cji, Asp, Steap2, Myp, Robo4, 1700058P15Rik, Arhgef17, Plpp5, Tnni1, Tmtc1, Ptchd1, 9930111J21Rik2, Atf6b, Tmem119, Il10, Washc5, Tedc1, Trim59, Dnm3, Plekhg2, Itprid2, Orai2, Plekha7, Gpr153, Pomgn1, Cryaa, Sfb3b, Slc39a11, Ndufa412, Ghr, Ctbp1, Rrbp1, Plekhg4, Itgav, Syt15, Cd63, Tbx2, Sfxn5, H6pd, Yif1a, Large1, Col5a2, B4galnt4, Sgsh, Crlf2, Copp2, Cstb, Tmem214, Nod1, P4ha2, Gnptab, Mamba, Dhx34, Actn4, Parp8, Nup93, Ehd3, Pten, Slc16a12, Mogs, Entpd7, Foxp1, Wipi1, Ptpn22, Ssr1, H13, Abcc3, Castor2, Golm1, Tic9, Pdr1 Doc2b, Arfgap1, Slc31a1, Nrras, Ube2ql1, Ddb1, Mcrip1, Stum, Amdhd2, Spry1, Serpine1, Npl, Rdh10, Fndc10, Bmi1, Adgra2, Arhgap25, Jag2, Nans, Slc44a2, Myo5a, Shtn1, Prdm11, Ifi30, Ipr1, Slc16a1, Dclk2, Sec22b, Dlg2, Hes1, Tmed9, Mark1, Aim2, Col6a1, Plbd2, Nsd2, Prr7, Ankrd37, Nuak1, Ptafr, Lmtk3, Ppp2r2c, Srx8, Wnt9a, Lyve1, Itga7, Tmed3, Tpi1, Fam214b, Oaz2, Als2cl, Bcar1, Zfp979, Gm42517, Ccdc166, Srprb, Pdia6, Rab3d, Cmtm4, A1427809, Ephb3, 4930555A03Rik, Ccl8, Serpinb8, Gab2, Gm5976, Tmem123, Copp1, Klhl5, Ctif, Cdk17, Siil, Laptm4b, Hyoul1, Gas211, Tnfsf8, Ptpk, Itpr1, Tm7sf3, Tbcd, Fbxo32, Ptpf, Cnnm2, Sema5b, Gucy1b1, Mtap, Ttc12, Cemip, Mch1, Tead2, Dnajc1, Sec61a1, Ankrd28, Cd93, Cdca3, Naglu, Ifngr2, Lrp12, P4ha3, Zfp618, Tapbp, Beat1, Pld4, Gorasp2, Snd1, Akt1s1, Dpp6, Pabpc4, Krt18, Adams15, Kif1c, Iqgap3, Col22a1, Tmem104, Dnm13a, Ly96, Cdh2, Tulp4, Gtse1, Abr, Lmna, Tubb5, Rrm1, Casp8, Plaur, Dusp4, Ada, Epha3, Gm49759, Mras, Nr4a2, A1115009, Mgat3, Zbtb7c, Mib1, Fdxr, Aoep, F730043M19Rik, Mmp11, Col6a3, Shisa5</i></p> |
| <p><b>SenMayo-mouse reduced: SenMayo mouse panel - HU_FETAL_RETINA_MICROGLIA (Hu et al., 2019)</b></p> | <p><i>Acvr1b, Ang, Angpt1, Angptl4, Areg, Axl, Bex3, Bmp2, Bmp6, Ccl1, Ccl2, Ccl20, Ccl24, Ccl26, Ccl5, Ccl7, Ccl8, Cd55, Cd9, Csf1, Csf2, Csf2rb, Cst10, Ctnnb1, Cxcl1, Cxcl10, Cxcl12, Cxcl2, Cxcl3, Cxcr2, Dkk1, Edn1, Egf, Egfr, Ereg, Esml1, Fas, Fgf1, Fgf2, Fgf7, Gdf15, Gem, Hgf, Hmgb1, Icam1, Icam5, Igf1, Igfbp1, Igfbp2, Igfbp3, Igfbp4, Igfbp5, Igfbp6, Igfbp7, Il10, Il13, Il15, Il18, Il1a, Il1b, Il2, Il6, Il7, Inha, Iqgap2, Itga2, Itpka, Jun, Kif1c, Mif, Mmp13, Mmp10, Mmp12, Mmp13, Mmp14, Mmp2, Mmp3, Mmp9, Nap114, Nrg1, Pappa, Pecam1, Pgf, Pigf, Plat, Plau, Ptbp1, Ptger2, Ptges, Rps6ka5, Scamp4, Sema3f, Serpinb3a, Serpine1, Serpine2, Spx, Timp2, Tnf, Tnfrsf11b, Tubgcp2, Vegfa, Vegfc, Vgf, Wnt16, Wnt2</i></p>                                                                                                                                                                                                                                                                                                                                                                                                                                                                                                                                                                                                                                                                                                                                                                                                                                                                                                                                                                                                                                                                                                                                                                                                                                                                                                                                                                                                                                                                                                                                                                                                                                                                                                                                                                                                                                                                                                                                                                                                                                                                                                                                                                                                                                                                                                                                                                                                                                                                                                                                                                                                                                                                                                                                                                                                                                                                                                                                                                                                                                                                                                                                                                                                                                                                                                                                                                                                                                                                                                                                                                                                                                                                                                                                                                                                                                                                                          |
| <p><b>SenMayo genes also found in HU_FETAL_RETINA_MICROGLIA</b></p>                                    | <p><i>C3, Ccl3, Ccl4, Ctsb, Cxcl16, Ets2, Gmfg, Il6st, Lcp1, Plaur, Selp1g, Spp1, Tnfrsf1a, Tnfrsf1b</i></p>                                                                                                                                                                                                                                                                                                                                                                                                                                                                                                                                                                                                                                                                                                                                                                                                                                                                                                                                                                                                                                                                                                                                                                                                                                                                                                                                                                                                                                                                                                                                                                                                                                                                                                                                                                                                                                                                                                                                                                                                                                                                                                                                                                                                                                                                                                                                                                                                                                                                                                                                                                                                                                                                                                                                                                                                                                                                                                                                                                                                                                                                                                                                                                                                                                                                                                                                                                                                                                                                                                                                                                                                                                                                                                                                                                                                                                                                                                                                                                                                                                                                                                                                                                                                                                                                                                                                                                                                                                                                                                                             |
| <p><b>Marsh et al., 2022 Microglia/Myeloid activation genes</b></p>                                    | <p><i>Rgs1, Hist2h2aa1, Hist1h4i, Nfkbiz, Klf2, Junb, Dusp1, Ccl3, Hspa1a, Hsp90aa1, Fos, Hspa1b, Jun, Jund, Nfkbid, Gem, Ccl4, Ier5, Txnip, Hist1h2bc, Zfp36, Hist1h1c, Egr1, Atf3, Rhob</i></p>                                                                                                                                                                                                                                                                                                                                                                                                                                                                                                                                                                                                                                                                                                                                                                                                                                                                                                                                                                                                                                                                                                                                                                                                                                                                                                                                                                                                                                                                                                                                                                                                                                                                                                                                                                                                                                                                                                                                                                                                                                                                                                                                                                                                                                                                                                                                                                                                                                                                                                                                                                                                                                                                                                                                                                                                                                                                                                                                                                                                                                                                                                                                                                                                                                                                                                                                                                                                                                                                                                                                                                                                                                                                                                                                                                                                                                                                                                                                                                                                                                                                                                                                                                                                                                                                                                                                                                                                                                        |
| <p><b>Marsh et al., 2022 All CNS cells activation genes</b></p>                                        | <p><i>Fos, Junb, Zfp36, Jun, Hspa1a, Soc3, Rgs1, Egr1, Btg2, Fosb, Hist1h1d, Ier5, 1500015O10Rik, Atf3, Hist1h2ac, Dusp1, Hist1h1e, Fcrl1, Serpine1</i></p>                                                                                                                                                                                                                                                                                                                                                                                                                                                                                                                                                                                                                                                                                                                                                                                                                                                                                                                                                                                                                                                                                                                                                                                                                                                                                                                                                                                                                                                                                                                                                                                                                                                                                                                                                                                                                                                                                                                                                                                                                                                                                                                                                                                                                                                                                                                                                                                                                                                                                                                                                                                                                                                                                                                                                                                                                                                                                                                                                                                                                                                                                                                                                                                                                                                                                                                                                                                                                                                                                                                                                                                                                                                                                                                                                                                                                                                                                                                                                                                                                                                                                                                                                                                                                                                                                                                                                                                                                                                                              |

**Supplementary table 3: Top 50 DEGs- mouse retinal microglia - SenMayo-hi vs SenMayo-low (pvaladj < 0.01)**

| Genes  | pval     | avg_log2 FC | pct. 1 | pct. 2 | p.adj    |
|--------|----------|-------------|--------|--------|----------|
| Ccl4   | 1.47E-64 | 3.886951    | 0.762  | 0.08   | 3.05E-60 |
| Ccl3   | 1.80E-83 | 3.809437    | 0.89   | 0.086  | 3.75E-79 |
| Atf3   | 1.95E-81 | 3.798743    | 0.834  | 0.052  | 4.05E-77 |
| Nfkbia | 6.41E-79 | 3.456228    | 0.814  | 0.049  | 1.33E-74 |
| Jun    | 1.15E-81 | 3.437646    | 0.921  | 0.181  | 2.39E-77 |
| Cxcl2  | 5.02E-13 | 3.381985    | 0.166  | 0.006  | 1.04E-08 |
| Ccl2   | 4.74E-56 | 3.203148    | 0.7    | 0.061  | 9.85E-52 |
| Zfp36  | 8.28E-83 | 3.196552    | 0.893  | 0.098  | 1.72E-78 |
| Btg2   | 1.23E-82 | 3.17878     | 0.91   | 0.12   | 2.56E-78 |
| Junb   | 1.27E-83 | 3.17813     | 0.941  | 0.218  | 2.64E-79 |
| Egr1   | 7.26E-80 | 3.162584    | 0.917  | 0.19   | 1.51E-75 |
| Dusp1  | 1.02E-77 | 3.146724    | 0.872  | 0.11   | 2.13E-73 |
| Klf2   | 1.53E-65 | 3.132573    | 0.769  | 0.067  | 3.17E-61 |
| Fos    | 3.57E-76 | 3.071351    | 0.928  | 0.291  | 7.43E-72 |
| Klf6   | 2.26E-78 | 2.942725    | 0.838  | 0.055  | 4.71E-74 |
| Klf4   | 4.13E-62 | 2.93656     | 0.697  | 0.037  | 8.60E-58 |
| Ccl7   | 2.43E-13 | 2.932145    | 0.169  | 0.006  | 5.05E-09 |
| Nfkbiz | 3.96E-74 | 2.906782    | 0.776  | 0.034  | 8.24E-70 |
| Fosb   | 6.65E-68 | 2.704742    | 0.848  | 0.12   | 1.38E-63 |
| Ier5   | 3.61E-82 | 2.700169    | 0.903  | 0.083  | 7.51E-78 |
| Ier3   | 1.33E-55 | 2.659714    | 0.672  | 0.049  | 2.78E-51 |
| Neat1  | 7.35E-70 | 2.642397    | 0.79   | 0.058  | 1.53E-65 |
| Jund   | 2.40E-72 | 2.60552     | 0.924  | 0.224  | 5.00E-68 |
| Ubc    | 2.33E-76 | 2.54719     | 0.952  | 0.322  | 4.85E-72 |
| Rgs1   | 4.31E-43 | 2.427852    | 0.514  | 0.021  | 8.96E-39 |

| Genes    | pval     | avg_log2 FC | pct. 1 | pct. 2 | p.adj    |
|----------|----------|-------------|--------|--------|----------|
| Rhob     | 1.84E-64 | 2.399563    | 0.824  | 0.101  | 3.83E-60 |
| Ier2     | 1.40E-67 | 2.357977    | 0.862  | 0.126  | 2.92E-63 |
| Ccl12    | 1.38E-40 | 2.319579    | 0.797  | 0.227  | 2.88E-36 |
| Slc15a3  | 1.36E-66 | 2.304062    | 0.728  | 0.034  | 2.83E-62 |
| Mafb     | 8.58E-56 | 2.231184    | 0.828  | 0.153  | 1.79E-51 |
| Ccnl1    | 1.03E-71 | 2.230491    | 0.838  | 0.071  | 2.15E-67 |
| Tnf      | 6.00E-50 | 2.159021    | 0.583  | 0.021  | 1.25E-45 |
| Hspa5    | 4.60E-60 | 2.140125    | 0.859  | 0.15   | 9.56E-56 |
| Socs3    | 4.22E-52 | 2.102302    | 0.686  | 0.074  | 8.78E-48 |
| Cx3cr1   | 7.74E-63 | 2.100993    | 0.931  | 0.307  | 1.61E-58 |
| I11a     | 7.37E-43 | 2.086557    | 0.497  | 0.012  | 1.53E-38 |
| Ppp1r15a | 1.80E-57 | 2.070882    | 0.669  | 0.037  | 3.75E-53 |
| Mcl1     | 5.03E-62 | 2.065362    | 0.879  | 0.147  | 1.05E-57 |
| Rgs2     | 7.27E-59 | 2.049254    | 0.803  | 0.104  | 1.51E-54 |
| Zfp3611  | 2.40E-60 | 2.047064    | 0.821  | 0.11   | 4.98E-56 |
| Marcksl1 | 1.02E-41 | 1.872481    | 0.476  | 0.009  | 2.12E-37 |
| Adrb2    | 3.22E-49 | 1.864653    | 0.566  | 0.018  | 6.69E-45 |
| Cd14     | 2.73E-55 | 1.860593    | 0.707  | 0.061  | 5.68E-51 |
| I11b     | 1.55E-15 | 1.817226    | 0.179  | 0      | 3.22E-11 |
| Btg1     | 1.07E-55 | 1.801105    | 0.838  | 0.144  | 2.23E-51 |
| Gm26532  | 1.08E-45 | 1.751434    | 0.521  | 0.012  | 2.24E-41 |
| Tmcc3    | 2.57E-59 | 1.731883    | 0.686  | 0.034  | 5.34E-55 |
| Kctd12   | 1.49E-48 | 1.674408    | 0.852  | 0.202  | 3.10E-44 |
| Srsf5    | 4.05E-54 | 1.673511    | 0.897  | 0.206  | 8.41E-50 |
| Cxcl10   | 4.42E-12 | 1.665091    | 0.138  | 0      | 9.18E-08 |

**Supplementary table 4a: Mouse retinal microglia-SenMayo-hi vs SenMayo-low –GSEA GO:BP – top 50 terms (FDR-qvalue < 0.05, NES > 1.5). Legend for Fig 2b- refer to top 30 terms.**

| No | ID                                            | ES       | NES      | pval     | p.adj    | qval     |
|----|-----------------------------------------------|----------|----------|----------|----------|----------|
| 1  | GOBP_LEUKOCYTE_DIFFERENTIATION                | 0.735117 | 2.090111 | 1.00E-10 | 8.18E-09 | 5.71E-09 |
| 2  | GOBP_LEUKOCYTE_MIGRATION                      | 0.749685 | 2.083389 | 1.00E-10 | 8.18E-09 | 5.71E-09 |
| 3  | GOBP_MONONUCLEAR_CELL_MIGRATION               | 0.788782 | 2.083272 | 1.00E-10 | 8.18E-09 | 5.71E-09 |
| 4  | GOBP_RESPONSE_TO_MOLECULE_OF_BACTERIAL_ORIGIN | 0.758338 | 2.081374 | 1.00E-10 | 8.18E-09 | 5.71E-09 |
| 5  | GOBP_MYELOID_LEUKOCYTE_DIFFERENTIATION        | 0.776039 | 2.074237 | 1.00E-10 | 8.18E-09 | 5.71E-09 |
| 6  | GOBP_RESPONSE_TO_CHEMOKINE                    | 0.863865 | 2.073511 | 1.47E-10 | 1.09E-08 | 7.61E-09 |

| No | ID                                                       | ES       | NES      | pval     | p.adj    | qval     |
|----|----------------------------------------------------------|----------|----------|----------|----------|----------|
| 7  | GOBP_LEUKOCYTE_CELL_CELL_ADHESION                        | 0.743264 | 2.060158 | 1.00E-10 | 8.18E-09 | 5.71E-09 |
| 8  | GOBP_MYELOID_LEUKOCYTE_MIGRATION                         | 0.770156 | 2.058511 | 1.00E-10 | 8.18E-09 | 5.71E-09 |
| 9  | GOBP_REGULATION_OF_LEUKOCYTE_DIFFERENTIATION             | 0.754222 | 2.05537  | 1.00E-10 | 8.18E-09 | 5.71E-09 |
| 10 | GOBP_POSITIVE_REGULATION_OF_LEUKOCYTE_MIGRATION          | 0.79563  | 2.046334 | 1.00E-10 | 8.18E-09 | 5.71E-09 |
| 11 | GOBP_REGULATION_OF_HEMOPOIESIS                           | 0.734157 | 2.037158 | 1.00E-10 | 8.18E-09 | 5.71E-09 |
| 12 | GOBP_CELLULAR_RESPONSE_TO_BIOTIC_STIMULUS                | 0.758294 | 2.03703  | 1.00E-10 | 8.18E-09 | 5.71E-09 |
| 13 | GOBP_MONONUCLEAR_CELL_DIFFERENTIATION                    | 0.727668 | 2.035915 | 1.00E-10 | 8.18E-09 | 5.71E-09 |
| 14 | GOBP_ERK1_AND_ERK2_CASCADE                               | 0.741288 | 2.035026 | 1.00E-10 | 8.18E-09 | 5.71E-09 |
| 15 | GOBP_CELLULAR_RESPONSE_TO_MOLECULE_OF_BACTERIAL_ORIGIN   | 0.766492 | 2.033631 | 1.00E-10 | 8.18E-09 | 5.71E-09 |
| 16 | GOBP_LEUKOCYTE_CHEMOTAXIS                                | 0.757527 | 2.03112  | 1.00E-10 | 8.18E-09 | 5.71E-09 |
| 17 | GOBP_REGULATION_OF_LEUKOCYTE_MIGRATION                   | 0.75797  | 2.029227 | 1.00E-10 | 8.18E-09 | 5.71E-09 |
| 18 | GOBP_CELL_CHEMOTAXIS                                     | 0.744182 | 2.028887 | 1.00E-10 | 8.18E-09 | 5.71E-09 |
| 19 | GOBP_GRANULOCYTE_MIGRATION                               | 0.784679 | 2.018556 | 1.47E-10 | 1.09E-08 | 7.61E-09 |
| 20 | GOBP_NEUTROPHIL_MIGRATION                                | 0.801044 | 2.015137 | 1.52E-09 | 9.07E-08 | 6.34E-08 |
| 21 | GOBP_REGULATION_OF_MONONUCLEAR_CELL_MIGRATION            | 0.798461 | 2.01313  | 1.93E-09 | 1.11E-07 | 7.78E-08 |
| 22 | GOBP_POSITIVE_REGULATION_OF_LEUKOCYTE_CELL_CELL_ADHESION | 0.747623 | 2.008365 | 1.00E-10 | 8.18E-09 | 5.71E-09 |
| 23 | GOBP_RESPONSE_TO_BACTERIUM                               | 0.707203 | 2.00672  | 1.00E-10 | 8.18E-09 | 5.71E-09 |
| 24 | GOBP_T_CELL_ACTIVATION                                   | 0.710497 | 2.003258 | 1.00E-10 | 8.18E-09 | 5.71E-09 |
| 25 | GOBP_CYTOKINE_MEDIATED_SIGNALING_PATHWAY                 | 0.715037 | 2.002224 | 1.00E-10 | 8.18E-09 | 5.71E-09 |
| 26 | GOBP_ADAPTIVE_IMMUNE_RESPONSE                            | 0.717477 | 1.999956 | 1.00E-10 | 8.18E-09 | 5.71E-09 |
| 27 | GOBP_LYMPHOCYTE_MIGRATION                                | 0.805585 | 1.999237 | 4.17E-09 | 2.27E-07 | 1.59E-07 |
| 28 | GOBP_MYELOID_CELL_DIFFERENTIATION                        | 0.716723 | 1.997085 | 1.00E-10 | 8.18E-09 | 5.71E-09 |
| 29 | GOBP_REGULATION_OF_MYELOID_LEUKOCYTE_DIFFERENTIATION     | 0.792459 | 1.996006 | 2.99E-09 | 1.68E-07 | 1.18E-07 |
| 30 | GOBP_REGULATION_OF_LEUKOCYTE_CHEMOTAXIS                  | 0.784432 | 1.991436 | 1.96E-09 | 1.12E-07 | 7.81E-08 |
| 31 | GOBP_INTERLEUKIN_6_PRODUCTION                            | 0.770507 | 1.987439 | 2.09E-10 | 1.48E-08 | 1.03E-08 |
| 32 | GOBP_LYMPHOCYTE_CHEMOTAXIS                               | 0.865076 | 1.986729 | 4.39E-07 | 1.41E-05 | 9.86E-06 |
| 33 | GOBP_POSITIVE_REGULATION_OF_HEMOPOIESIS                  | 0.763347 | 1.984638 | 8.53E-10 | 5.49E-08 | 3.84E-08 |
| 34 | GOBP_GRANULOCYTE_CHEMOTAXIS                              | 0.785294 | 1.984439 | 4.65E-09 | 2.51E-07 | 1.75E-07 |
| 35 | GOBP_NEUTROPHIL_CHEMOTAXIS                               | 0.806063 | 1.98392  | 1.79E-08 | 8.68E-07 | 6.07E-07 |
| 36 | GOBP_POSITIVE_REGULATION_OF_CELL_ACTIVATION              | 0.715279 | 1.98307  | 1.00E-10 | 8.18E-09 | 5.71E-09 |
| 37 | GOBP_NEGATIVE_REGULATION_OF_IMMUNE_SYSTEM_PROCESS        | 0.709857 | 1.980494 | 1.00E-10 | 8.18E-09 | 5.71E-09 |
| 38 | GOBP_SENSORY_PERCEPTION_OF_PAIN                          | 0.802398 | 1.975316 | 3.64E-08 | 1.70E-06 | 1.19E-06 |
| 39 | GOBP_POSITIVE_REGULATION_OF_ERK1_AND_ERK2_CASCADE        | 0.741534 | 1.973619 | 1.00E-10 | 8.18E-09 | 5.71E-09 |
| 40 | GOBP_REGULATION_OF_MYELOID_CELL_DIFFERENTIATION          | 0.746075 | 1.972986 | 1.18E-10 | 9.19E-09 | 6.42E-09 |
| 41 | GOBP_MONOCYTE_CHEMOTAXIS                                 | 0.858156 | 1.97262  | 1.46E-07 | 5.62E-06 | 3.93E-06 |

| No | ID                                               | ES       | NES      | pval     | p.adj    | qval     |
|----|--------------------------------------------------|----------|----------|----------|----------|----------|
| 42 | GOBP_T_CELL_DIFFERENTIATION                      | 0.723067 | 1.961559 | 1.00E-10 | 8.18E-09 | 5.71E-09 |
| 43 | GOBP_CELLULAR_EXTRAVASATION                      | 0.819018 | 1.959999 | 1.26E-07 | 4.93E-06 | 3.44E-06 |
| 44 | GOBP_POSITIVE_REGULATION_OF_CELL_CELL_ADHESION   | 0.721889 | 1.959731 | 1.00E-10 | 8.18E-09 | 5.71E-09 |
| 45 | GOBP_REGULATION_OF_CHEMOTAXIS                    | 0.730333 | 1.958208 | 1.00E-10 | 8.18E-09 | 5.71E-09 |
| 46 | GOBP_REGULATION_OF_LYMPHOCYTE_ACTIVATION         | 0.695682 | 1.950923 | 1.00E-10 | 8.18E-09 | 5.71E-09 |
| 47 | GOBP_B_CELL_DIFFERENTIATION                      | 0.768486 | 1.95027  | 4.94E-09 | 2.64E-07 | 1.84E-07 |
| 48 | GOBP_REGULATION_OF_LYMPHOCYTE_DIFFERENTIATION    | 0.737033 | 1.947733 | 1.45E-09 | 8.85E-08 | 6.18E-08 |
| 49 | GOBP_REGULATION_OF_T_CELL_ACTIVATION             | 0.707803 | 1.9431   | 1.00E-10 | 8.18E-09 | 5.71E-09 |
| 50 | GOBP_POSITIVE_REGULATION_OF_LEUKOCYTE_CHEMOTAXIS | 0.787993 | 1.939854 | 1.62E-07 | 6.09E-06 | 4.25E-06 |

**Supplementary table 4b: Mouse retinal microglia-SenMayo-hi vs SenMayo-low –GSEA pathway enrichment terms top 50 terms – (FDR- qvalue < 0.05, NES > 1.5). Legend for Fig 2d- refer to top 30 terms.**

| No | ID                                                                 | ES       | NES      | pval     | p.adj    | qval     |
|----|--------------------------------------------------------------------|----------|----------|----------|----------|----------|
| 1  | REACTOME_PEPTIDE_LIGAND_BINDING_RECEPTORS                          | 0.862706 | 2.220181 | 1.00E-10 | 6.66E-09 | 5.10E-09 |
| 2  | KEGG_CYTOKINE_CYTOKINE_RECEPTOR_INTERACTION                        | 0.813186 | 2.152557 | 1.00E-10 | 6.66E-09 | 5.10E-09 |
| 3  | REACTOME_CHEMOKINE_RECEPTORS_BIND_CHEMOKINES                       | 0.931389 | 2.061244 | 3.24E-10 | 2.08E-08 | 1.60E-08 |
| 4  | REACTOME_INTERLEUKIN_4_AND_INTERLEUKIN_13_SIGNALING                | 0.816951 | 2.049147 | 1.00E-10 | 6.66E-09 | 5.10E-09 |
| 5  | REACTOME_CLASS_A_1_RHODOPSIN_LIKE_RECEPTORS                        | 0.750866 | 2.029038 | 1.00E-10 | 6.66E-09 | 5.10E-09 |
| 6  | KEGG_LEISHMANIA_INFECTION                                          | 0.869227 | 2.022064 | 1.40E-09 | 8.12E-08 | 6.22E-08 |
| 7  | PID_API1_PATHWAY                                                   | 0.85073  | 2.008975 | 5.47E-09 | 2.89E-07 | 2.21E-07 |
| 8  | REACTOME_INTERLEUKIN_10_SIGNALING                                  | 0.920799 | 2.002904 | 1.41E-08 | 7.03E-07 | 5.39E-07 |
| 9  | KEGG_TOLL_LIKE_RECEPTOR_SIGNALING_PATHWAY                          | 0.80706  | 1.970677 | 9.09E-09 | 4.67E-07 | 3.58E-07 |
| 10 | KEGG_HEMATOPOIETIC_CELL_LINEAGE                                    | 0.818121 | 1.95968  | 9.14E-08 | 4.01E-06 | 3.07E-06 |
| 11 | PID_IL6_7_PATHWAY                                                  | 0.863833 | 1.952983 | 4.12E-07 | 1.54E-05 | 1.18E-05 |
| 12 | REACTOME_SIGNALING_BY_INTERLEUKINS                                 | 0.689115 | 1.931653 | 1.00E-10 | 6.66E-09 | 5.10E-09 |
| 13 | REACTOME_NUCLEAR_EVENTS_KINASE_AND_TRANSCRIPTION_FACTOR_ACTIVATION | 0.822975 | 1.927769 | 3.85E-07 | 1.47E-05 | 1.13E-05 |
| 14 | PID_NFAT_TFPATHWAY                                                 | 0.88615  | 1.927537 | 9.95E-07 | 3.44E-05 | 2.64E-05 |
| 15 | PID_IL23_PATHWAY                                                   | 0.911681 | 1.920539 | 1.08E-06 | 3.67E-05 | 2.81E-05 |
| 16 | PID_IL12_2PATHWAY                                                  | 0.823573 | 1.900182 | 2.53E-06 | 7.91E-05 | 6.06E-05 |
| 17 | KEGG_JAK_STAT_SIGNALING_PATHWAY                                    | 0.7486   | 1.897009 | 7.68E-08 | 3.54E-06 | 2.71E-06 |
| 18 | REACTOME_NGF_STIMULATED_TRANSCRIPTION                              | 0.854059 | 1.890107 | 6.55E-06 | 0.000171 | 0.000131 |
| 19 | PID_FRA_PATHWAY                                                    | 0.867331 | 1.886602 | 8.41E-06 | 0.00021  | 0.000161 |
| 20 | REACTOME_TOLL_LIKE_RECEPTOR_CASCADES                               | 0.72388  | 1.882177 | 8.47E-08 | 3.80E-06 | 2.91E-06 |
| 21 | KEGG_LEUKOCYTE_TRANSENDOTHELIAL_MIGRATION                          | 0.742878 | 1.878243 | 3.31E-07 | 1.29E-05 | 9.90E-06 |
| 22 | KEGG_NOD_LIKE_RECEPTOR_SIGNALING_PATHWAY                           | 0.810743 | 1.870581 | 7.42E-06 | 0.000188 | 0.000144 |
| 23 | PID_SMAD2_3NUCLEAR_PATHWAY                                         | 0.778271 | 1.863265 | 2.14E-06 | 7.11E-05 | 5.45E-05 |

| No | ID                                            | ES       | NES      | pval     | p.adj    | qval     |
|----|-----------------------------------------------|----------|----------|----------|----------|----------|
| 24 | KEGG_ANTIGEN_PROCESSING_AND_PRESENTATION      | 0.816624 | 1.86275  | 6.17E-06 | 0.000167 | 0.000128 |
| 25 | KEGG_LYSOSOME                                 | 0.735391 | 1.862376 | 6.05E-07 | 2.17E-05 | 1.67E-05 |
| 26 | PID_BCR_5PATHWAY                              | 0.787702 | 1.854001 | 6.86E-06 | 0.000176 | 0.000135 |
| 27 | KEGG_COMPLEMENT_AND_COAGULATION_CASCADES      | 0.810656 | 1.850407 | 3.89E-05 | 0.000848 | 0.00065  |
| 28 | KEGG_B_CELL_RECEPTOR_SIGNALING_PATHWAY        | 0.766359 | 1.848144 | 1.02E-05 | 0.00025  | 0.000192 |
| 29 | KEGG_SYSTEMIC_LUPUS_ERYTHEMATOSUS             | 0.824129 | 1.823869 | 5.83E-05 | 0.001191 | 0.000913 |
| 30 | REACTOME_INTERFERON_ALPHA_BETA_SIGNALING      | 0.785989 | 1.813467 | 3.92E-05 | 0.000848 | 0.00065  |
| 31 | PID_FCER1_PATHWAY                             | 0.77972  | 1.812243 | 3.47E-05 | 0.000769 | 0.00059  |
| 32 | PID_IL4_2PATHWAY                              | 0.787215 | 1.804182 | 5.10E-05 | 0.001068 | 0.000818 |
| 33 | BIOCARTA_MAPK_PATHWAY                         | 0.736785 | 1.78968  | 6.48E-06 | 0.000171 | 0.000131 |
| 34 | PID_AMB2_NEUTROPHILS_PATHWAY                  | 0.828907 | 1.786433 | 0.000101 | 0.001993 | 0.001527 |
| 35 | REACTOME_SIGNALING_BY_NTRKS                   | 0.689883 | 1.783641 | 2.39E-06 | 7.68E-05 | 5.88E-05 |
| 36 | REACTOME_INTERFERON_GAMMA_SIGNALING           | 0.732595 | 1.783371 | 3.33E-05 | 0.000749 | 0.000574 |
| 37 | REACTOME_TOLL_LIKE_RECEPTOR_TLR1_TLR2_CASCADE | 0.71039  | 1.778671 | 4.48E-05 | 0.000958 | 0.000734 |
| 38 | KEGG_T_CELL_RECEPTOR_SIGNALING_PATHWAY        | 0.707871 | 1.776125 | 1.63E-05 | 0.000381 | 0.000292 |
| 39 | BIOCARTA_KERATINOCYTE_PATHWAY                 | 0.785497 | 1.769928 | 0.000269 | 0.00484  | 0.003709 |
| 40 | REACTOME_MYD88_INDEPENDENT_TLR4_CASCADE       | 0.708787 | 1.767321 | 5.11E-05 | 0.001068 | 0.000818 |
| 41 | KEGG_CYTOSOLIC_DNA_SENSING_PATHWAY            | 0.800965 | 1.759921 | 0.000401 | 0.00668  | 0.005118 |
| 42 | REACTOME_INTERLEUKIN_2_FAMILY_SIGNALING       | 0.790487 | 1.756452 | 0.000452 | 0.007317 | 0.005606 |
| 43 | KEGG_MAPK_SIGNALING_PATHWAY                   | 0.644167 | 1.75411  | 1.67E-07 | 6.65E-06 | 5.10E-06 |
| 44 | KEGG_GRAFT_VERSUS_HOST_DISEASE                | 0.858336 | 1.753878 | 0.000473 | 0.007514 | 0.005757 |
| 45 | PID_PDGFRB_PATHWAY                            | 0.678673 | 1.746284 | 1.59E-05 | 0.000376 | 0.000288 |
| 46 | REACTOME_NEUTROPHIL_DEGRANULATION             | 0.620758 | 1.744091 | 1.78E-09 | 9.70E-08 | 7.44E-08 |
| 47 | BIOCARTA_IL1R_PATHWAY                         | 0.826055 | 1.74016  | 0.000718 | 0.010076 | 0.00772  |
| 48 | BIOCARTA_PPARA_PATHWAY                        | 0.761102 | 1.737295 | 0.000787 | 0.010739 | 0.008228 |
| 49 | BIOCARTA_NKT_PATHWAY                          | 0.905378 | 1.737082 | 0.000137 | 0.00257  | 0.001969 |
| 50 | REACTOME_PERK_REGULATES_GENE_EXPRESSION       | 0.818218 | 1.737063 | 0.000791 | 0.010739 | 0.008228 |

**Supplementary table 5: Top 50 DEGs- mouse retinal Mueller glia - SenMayo-hi vs SenMayo-low (pvaladj < 0.01)**

| Genes | pval      | avg_log2 FC | pct. 1 | pct. 2 | p.adj     |
|-------|-----------|-------------|--------|--------|-----------|
| Vegfa | 1.11E-248 | 0.563909    | 0.649  | 0.305  | 2.31E-244 |
| Cebpd | 1.43E-119 | 0.543643    | 0.879  | 0.652  | 2.98E-115 |
| Socs3 | 7.80E-105 | 0.531604    | 0.655  | 0.443  | 1.62E-100 |
| Jun   | 9.34E-176 | 0.508356    | 0.981  | 0.765  | 1.94E-171 |
| Fos   | 2.65E-163 | 0.495905    | 0.968  | 0.78   | 5.51E-159 |
| Fosb  | 7.63E-145 | 0.492667    | 0.932  | 0.674  | 1.59E-140 |

| Genes   | pval      | avg_log2 FC | pct. 1 | pct. 2 | p.adj     |
|---------|-----------|-------------|--------|--------|-----------|
| Ccn1    | 6.55E-132 | 0.481493    | 0.898  | 0.644  | 1.36E-127 |
| Btg2    | 2.25E-143 | 0.479724    | 0.949  | 0.719  | 4.68E-139 |
| Zfp36   | 6.45E-117 | 0.469961    | 0.839  | 0.601  | 1.34E-112 |
| Timp3   | 4.77E-147 | 0.466381    | 0.964  | 0.715  | 9.93E-143 |
| Junb    | 5.59E-136 | 0.462877    | 0.955  | 0.736  | 1.16E-131 |
| Adamts1 | 8.97E-103 | 0.458981    | 0.782  | 0.552  | 1.86E-98  |

| Genes   | pval      | avg_log2 FC | pct. 1 | pct. 2 | p.adj     |
|---------|-----------|-------------|--------|--------|-----------|
| Il6st   | 3.10E-225 | 0.451357    | 0.628  | 0.3    | 6.45E-221 |
| Egr1    | 7.31E-135 | 0.44264     | 0.955  | 0.731  | 1.52E-130 |
| Igfbp4  | 1.41E-197 | 0.436479    | 0.573  | 0.272  | 2.94E-193 |
| Dusp1   | 1.97E-116 | 0.432177    | 0.895  | 0.655  | 4.10E-112 |
| Gas1    | 1.88E-86  | 0.428557    | 0.816  | 0.592  | 3.91E-82  |
| Timp2   | 6.01E-192 | 0.428106    | 0.885  | 0.566  | 1.25E-187 |
| Ctsb    | 1.07E-214 | 0.427234    | 0.852  | 0.504  | 2.22E-210 |
| Zfp361l | 4.30E-123 | 0.424775    | 0.953  | 0.703  | 8.95E-119 |
| Ier2    | 7.97E-116 | 0.405636    | 0.945  | 0.738  | 1.66E-111 |
| Gadd45g | 9.66E-51  | 0.397938    | 0.381  | 0.245  | 2.01E-46  |
| Mmp14   | 8.61E-184 | 0.397103    | 0.389  | 0.151  | 1.79E-179 |
| Nfkbiz  | 5.23E-98  | 0.394704    | 0.591  | 0.373  | 1.09E-93  |
| Ier3    | 8.64E-59  | 0.393421    | 0.584  | 0.415  | 1.80E-54  |
| Jund    | 1.54E-116 | 0.383791    | 0.981  | 0.791  | 3.21E-112 |
| Aqp4    | 1.13E-118 | 0.379814    | 0.984  | 0.791  | 2.35E-114 |
| Cebpb   | 1.90E-66  | 0.378762    | 0.477  | 0.310  | 3.96E-62  |
| Hes1    | 7.30E-85  | 0.367614    | 0.949  | 0.742  | 1.52E-80  |
| Ubc     | 1.69E-93  | 0.367603    | 0.975  | 0.778  | 3.52E-89  |
| Bsg     | 2.77E-98  | 0.361527    | 0.998  | 0.874  | 5.76E-94  |

| Genes    | pval      | avg_log2 FC | pct. 1 | pct. 2 | p.adj     |
|----------|-----------|-------------|--------|--------|-----------|
| Cxcl16   | 1.10E-168 | 0.35663     | 0.721  | 0.407  | 2.29E-164 |
| Trf      | 6.55E-68  | 0.355519    | 0.697  | 0.509  | 1.36E-63  |
| Ccn2     | 6.57E-41  | 0.354584    | 0.432  | 0.302  | 1.37E-36  |
| Ppp1r15a | 9.01E-57  | 0.35378     | 0.506  | 0.344  | 1.87E-52  |
| Atf3     | 7.71E-35  | 0.353285    | 0.266  | 0.169  | 1.60E-30  |
| Cp       | 2.41E-102 | 0.350238    | 0.984  | 0.783  | 5.01E-98  |
| Dkk3     | 2.28E-120 | 0.346962    | 0.995  | 0.846  | 4.74E-116 |
| Mcl1     | 1.12E-99  | 0.346813    | 0.717  | 0.481  | 2.32E-95  |
| Isg15    | 3.02E-16  | 0.346525    | 0.167  | 0.112  | 6.29E-12  |
| Sox9     | 4.18E-96  | 0.345192    | 0.944  | 0.704  | 8.69E-92  |
| Malat1   | 1.16E-126 | 0.343009    | 1      | 0.998  | 2.42E-122 |
| Zfp3612  | 1.20E-91  | 0.341559    | 0.903  | 0.664  | 2.49E-87  |
| Ifit3    | 5.20E-31  | 0.339698    | 0.432  | 0.309  | 1.08E-26  |
| Gpr37    | 1.17E-98  | 0.335353    | 0.979  | 0.748  | 2.43E-94  |
| Plpp3    | 3.34E-104 | 0.333593    | 0.952  | 0.691  | 6.95E-100 |
| Egfr     | 1.03E-146 | 0.333264    | 0.352  | 0.142  | 2.13E-142 |
| Slc1a3   | 1.36E-96  | 0.332514    | 0.988  | 0.775  | 2.84E-92  |
| Klf6     | 2.96E-63  | 0.328786    | 0.517  | 0.342  | 6.16E-59  |
| Irf2bpl  | 6.25E-91  | 0.326296    | 0.746  | 0.509  | 1.30E-86  |

**Supplementary table 6a: Mouse retinal Mueller glia-SenMayo-hi vs SenMayo-low –GSEA GO:BP – top 50 terms (FDR-qvalue < 0.05, NES > 1.5). Legend for Fig 3b- refer to top 30 terms.**

| No | ID                                                                                          | ES       | NES      | pval     | p.adj    | qval     |
|----|---------------------------------------------------------------------------------------------|----------|----------|----------|----------|----------|
| 1  | GOBP_MORPHOGENESIS_OF_A_BRANCHING_STRUCTURE                                                 | 0.751748 | 2.059233 | 1.00E-10 | 1.91E-08 | 1.39E-08 |
| 2  | GOBP_TRANSMEMBRANE_RECEPTOR_PROTEIN_SERINE_THREONINE_KINASE_SIGNALING_PATHWAY               | 0.698313 | 2.052856 | 1.00E-10 | 1.91E-08 | 1.39E-08 |
| 3  | GOBP_BRANCHING_MORPHOGENESIS_OF_AN_EPITHELIAL_TUBE                                          | 0.754244 | 2.012238 | 1.43E-10 | 2.62E-08 | 1.91E-08 |
| 4  | GOBP_MULTI_MULTICELLULAR_ORGANISM_PROCESS                                                   | 0.725379 | 1.989689 | 1.00E-10 | 1.91E-08 | 1.39E-08 |
| 5  | GOBP_REGULATION_OF_TRANSMEMBRANE_RECEPTOR_PROTEIN_SERINE_THREONINE_KINASE_SIGNALING_PATHWAY | 0.698637 | 1.972143 | 1.00E-10 | 1.91E-08 | 1.39E-08 |
| 6  | GOBP_REGULATION_OF_EPITHELIAL_CELL_DIFFERENTIATION                                          | 0.748315 | 1.966853 | 6.70E-09 | 7.38E-07 | 5.38E-07 |
| 7  | GOBP_EPITHELIAL_CELL_PROLIFERATION                                                          | 0.665288 | 1.963904 | 1.00E-10 | 1.91E-08 | 1.39E-08 |
| 8  | GOBP_RESPONSE_TO_BMP                                                                        | 0.728206 | 1.963363 | 1.24E-09 | 1.62E-07 | 1.18E-07 |
| 9  | GOBP_REGULATION_OF_MORPHOGENESIS_OF_A_BRANCHING_STRUCTURE                                   | 0.855071 | 1.95202  | 1.71E-07 | 1.05E-05 | 7.62E-06 |
| 10 | GOBP_RESPIRATORY_SYSTEM_DEVELOPMENT                                                         | 0.701974 | 1.944848 | 5.93E-10 | 8.90E-08 | 6.48E-08 |
| 11 | GOBP_SMAD_PROTEIN_SIGNAL_TRANSDUCTION                                                       | 0.783834 | 1.94414  | 3.62E-07 | 1.93E-05 | 1.41E-05 |
| 12 | GOBP_REGULATION_OF_ANIMAL_ORGAN_MORPHOGENESIS                                               | 0.743723 | 1.940978 | 1.85E-08 | 1.73E-06 | 1.26E-06 |
| 13 | GOBP_REPRODUCTIVE_SYSTEM_DEVELOPMENT                                                        | 0.654169 | 1.929693 | 1.00E-10 | 1.91E-08 | 1.39E-08 |

| No | ID                                                                                                   | ES       | NES          | pval         | p.adjust     | qval         |
|----|------------------------------------------------------------------------------------------------------|----------|--------------|--------------|--------------|--------------|
| 14 | GOBP_RESPONSE_TO_FIBROBLAST_GROWTH_FACTOR                                                            | 0.749465 | 1.92<br>7064 | 1.11<br>E-07 | 7.77<br>E-06 | 5.66<br>E-06 |
| 15 | GOBP_NEGATIVE_REGULATION_OF_VASCULATURE_DEVELOPMENT                                                  | 0.752671 | 1.92<br>3341 | 2.03<br>E-07 | 1.17<br>E-05 | 8.53<br>E-06 |
| 16 | GOBP_REGULATION_OF_LIPID_BIOSYNTHETIC_PROCESS                                                        | 0.712804 | 1.92<br>1837 | 1.09<br>E-08 | 1.12<br>E-06 | 8.17<br>E-07 |
| 17 | GOBP_ANTIGEN_PROCESSING_AND_PRESENTATION                                                             | 0.754805 | 1.91<br>3075 | 2.64<br>E-07 | 1.47<br>E-05 | 1.07<br>E-05 |
| 18 | GOBP_REGULATION_OF_MORPHOGENESIS_OF_AN_EPITHELIUM                                                    | 0.807612 | 1.90<br>7477 | 1.17<br>E-06 | 5.10<br>E-05 | 3.72<br>E-05 |
| 19 | GOBP_NEGATIVE_REGULATION_OF_CELLULAR_RESPONSE_TO_GROWTH_FACTOR_STIMULUS                              | 0.752415 | 1.90<br>7299 | 2.53<br>E-07 | 1.43<br>E-05 | 1.04<br>E-05 |
| 20 | GOBP_MICROGLIAL_CELL_ACTIVATION                                                                      | 0.852182 | 1.90<br>6746 | 6.68<br>E-07 | 3.25<br>E-05 | 2.37<br>E-05 |
| 21 | GOBP_LEUKOCYTE_CELL_CELL_ADHESION                                                                    | 0.649517 | 1.90<br>5834 | 1.00<br>E-10 | 1.91<br>E-08 | 1.39<br>E-08 |
| 22 | GOBP_POSITIVE_REGULATION_OF_MORPHOGENESIS_OF_AN_EPITHELIUM                                           | 0.88579  | 1.90<br>5482 | 7.30<br>E-07 | 3.44<br>E-05 | 2.51<br>E-05 |
| 23 | GOBP_ASTROCYTE_DIFFERENTIATION                                                                       | 0.76774  | 1.90<br>4119 | 1.58<br>E-06 | 6.30<br>E-05 | 4.59<br>E-05 |
| 24 | GOBP_MATERNAL_PROCESS_INVOLVED_IN_FEMALE_PREGNANCY                                                   | 0.808299 | 1.90<br>2081 | 2.32<br>E-06 | 8.70<br>E-05 | 6.34<br>E-05 |
| 25 | GOBP_POSITIVE_REGULATION_OF_LIPID_BIOSYNTHETIC_PROCESS                                               | 0.766257 | 1.89<br>8591 | 8.98<br>E-07 | 4.05<br>E-05 | 2.95<br>E-05 |
| 26 | GOBP_T_CELL_ACTIVATION                                                                               | 0.636442 | 1.89<br>6708 | 1.00<br>E-10 | 1.91<br>E-08 | 1.39<br>E-08 |
| 27 | GOBP_POSITIVE_REGULATION_OF_TRANSMEMBRANE_RECEPTOR_PROTEIN_SERINE_THREONINE_KINASE_SIGNALING_PATHWAY | 0.729016 | 1.89<br>5115 | 1.32<br>E-07 | 8.81<br>E-06 | 6.42<br>E-06 |
| 28 | GOBP_REGULATION_OF_OSTEOBLAST_DIFFERENTIATION                                                        | 0.72125  | 1.89<br>2225 | 1.99<br>E-07 | 1.16<br>E-05 | 8.47<br>E-06 |
| 29 | GOBP_REGULATION_OF_CELL_CELL_ADHESION                                                                | 0.640464 | 1.88<br>9786 | 1.00<br>E-10 | 1.91<br>E-08 | 1.39<br>E-08 |
| 30 | GOBP_ERK1_AND_ERK2_CASCADE                                                                           | 0.650064 | 1.88<br>4651 | 2.07<br>E-10 | 3.42<br>E-08 | 2.49<br>E-08 |
| 31 | GOBP_NEGATIVE_REGULATION_OF_CELL_ADHESION                                                            | 0.661685 | 1.88<br>3913 | 6.73<br>E-10 | 9.53<br>E-08 | 6.95<br>E-08 |
| 32 | GOBP_NEGATIVE_REGULATION_OF_EPITHELIAL_CELL_DIFFERENTIATION                                          | 0.865442 | 1.88<br>3817 | 2.83<br>E-06 | 9.96<br>E-05 | 7.26<br>E-05 |
| 33 | GOBP_ENDOTHELIUM_DEVELOPMENT                                                                         | 0.714376 | 1.87<br>9957 | 1.32<br>E-07 | 8.81<br>E-06 | 6.42<br>E-06 |
| 34 | GOBP_KIDNEY_MORPHOGENESIS                                                                            | 0.75128  | 1.87<br>9905 | 2.66<br>E-06 | 9.68<br>E-05 | 7.05<br>E-05 |
| 35 | GOBP_NEGATIVE_REGULATION_OF_REPRODUCTIVE_PROCESS                                                     | 0.815163 | 1.87<br>9719 | 3.39<br>E-06 | 0.00<br>0117 | 8.50<br>E-05 |
| 36 | GOBP_MESENCHYMAL_CELL_PROLIFERATION                                                                  | 0.854337 | 1.87<br>8932 | 1.42<br>E-06 | 5.80<br>E-05 | 4.22<br>E-05 |
| 37 | GOBP_POSITIVE_REGULATION_OF_PHOSPHATIDYLINOSITOL_3_KINASE_SIGNALING                                  | 0.756636 | 1.87<br>8079 | 2.38<br>E-06 | 8.80<br>E-05 | 6.41<br>E-05 |
| 38 | GOBP_POSITIVE_REGULATION_OF_CELL_CELL_ADHESION                                                       | 0.663603 | 1.87<br>434  | 1.96<br>E-09 | 2.49<br>E-07 | 1.81<br>E-07 |
| 39 | GOBP_REGULATION_OF_LEUKOCYTE_DIFFERENTIATION                                                         | 0.6594   | 1.87<br>3077 | 2.06<br>E-09 | 2.56<br>E-07 | 1.86<br>E-07 |
| 40 | GOBP_MYELOID_LEUKOCYTE_DIFFERENTIATION                                                               | 0.675958 | 1.87<br>2769 | 2.90<br>E-08 | 2.52<br>E-06 | 1.84<br>E-06 |
| 41 | GOBP_REGULATION_OF_MESENCHYMAL_CELL_PROLIFERATION                                                    | 0.885411 | 1.87<br>0628 | 6.40<br>E-06 | 0.00<br>0193 | 0.00<br>0141 |
| 42 | GOBP_REGULATION_OF_CARTILAGE_DEVELOPMENT                                                             | 0.773961 | 1.87<br>0077 | 4.50<br>E-06 | 0.00<br>0145 | 0.00<br>0106 |
| 43 | GOBP_GLAND_MORPHOGENESIS                                                                             | 0.716831 | 1.86<br>8461 | 8.67<br>E-07 | 3.94<br>E-05 | 2.87<br>E-05 |
| 44 | GOBP_NEGATIVE_REGULATION_OF_TRANSMEMBRANE_RECEPTOR_PROTEIN_SERINE_THREONINE_KINASE_SIGNALING_PATHWAY | 0.710588 | 1.86<br>7693 | 6.18<br>E-07 | 3.06<br>E-05 | 2.23<br>E-05 |
| 45 | GOBP_GLIAL_CELL_DIFFERENTIATION                                                                      | 0.668454 | 1.86<br>6625 | 3.79<br>E-08 | 3.13<br>E-06 | 2.28<br>E-06 |
| 46 | GOBP_REGULATION_OF_BMP_SIGNALING_PATHWAY                                                             | 0.732172 | 1.86<br>4162 | 2.82<br>E-06 | 9.96<br>E-05 | 7.26<br>E-05 |
| 47 | GOBP_REGULATION_OF_STEROID_BIOSYNTHETIC_PROCESS                                                      | 0.781681 | 1.86<br>1921 | 4.46<br>E-06 | 0.00<br>0145 | 0.00<br>0105 |
| 48 | GOBP_FEMALE_SEX_DIFFERENTIATION                                                                      | 0.71315  | 1.86<br>1707 | 9.61<br>E-07 | 4.25<br>E-05 | 3.10<br>E-05 |

| No | ID                                                     | ES       | NES          | pval         | p.adjust     | qval         |
|----|--------------------------------------------------------|----------|--------------|--------------|--------------|--------------|
| 49 | GOBP_REGULATION_OF_T_CELL_ACTIVATION                   | 0.641498 | 1.85<br>9814 | 9.68<br>E-10 | 1.30<br>E-07 | 9.45<br>E-08 |
| 50 | GOBP_POSITIVE_REGULATION_OF_ANIMAL_ORGAN_MORPHOGENESIS | 0.889905 | 1.85<br>9629 | 5.67<br>E-06 | 0.00<br>0178 | 0.00<br>013  |

**Supplementary table 6b: Mouse retinal Mueller glia-SenMayo-hi vs SenMayo-low –GSEA pathway enrichment terms – top 50 terms (FDR-qvalue < 0.05, NES > 1.5). Legend for Fig 3d- refer to top 30 terms.**

| No | ID                                                            | ES               | NES              | pval             | p.adjust         | qval             |
|----|---------------------------------------------------------------|------------------|------------------|------------------|------------------|------------------|
| 1  | KEGG_CYTOKINE_CYTOKINE_RECEPTOR_INTERACTION                   | 0.73<br>802<br>5 | 2.04<br>472<br>9 | 1.00<br>E-<br>10 | 7.49<br>E-<br>09 | 6.02<br>E-<br>09 |
| 2  | REACTOME_INTERLEUKIN_4_AND_INTERLEUKIN_13_SIGNALING           | 0.78<br>544<br>9 | 2.01<br>444<br>2 | 1.97<br>E-<br>09 | 1.22<br>E-<br>07 | 9.79<br>E-<br>08 |
| 3  | PID_API_PATHWAY                                               | 0.82<br>21       | 1.98<br>827<br>6 | 1.25<br>E-<br>08 | 7.47<br>E-<br>07 | 6.00<br>E-<br>07 |
| 4  | REACTOME_DEGRADATION_OF_THE_EXTRACELLULAR_MATRIX              | 0.74<br>019<br>1 | 1.94<br>634<br>5 | 2.98<br>E-<br>08 | 1.73<br>E-<br>06 | 1.39<br>E-<br>06 |
| 5  | REACTOME_INTERFERON_ALPHA_BETA_SIGNALING                      | 0.82<br>225<br>8 | 1.93<br>492<br>9 | 2.90<br>E-<br>07 | 1.35<br>E-<br>05 | 1.08<br>E-<br>05 |
| 6  | PID_IL6_7_PATHWAY                                             | 0.83<br>691<br>1 | 1.92<br>079<br>6 | 1.04<br>E-<br>06 | 4.36<br>E-<br>05 | 3.50<br>E-<br>05 |
| 7  | REACTOME_EXTRACELLULAR_MATRIX_ORGANIZATION                    | 0.67<br>079<br>3 | 1.91<br>908<br>9 | 1.00<br>E-<br>10 | 7.49<br>E-<br>09 | 6.02<br>E-<br>09 |
| 8  | KEGG_JAK_STAT_SIGNALING_PATHWAY                               | 0.72<br>419<br>4 | 1.89<br>763      | 1.02<br>E-<br>07 | 5.39<br>E-<br>06 | 4.33<br>E-<br>06 |
| 9  | KEGG_CELL_ADHESION_MOLECULES_CAMS                             | 0.72<br>945<br>7 | 1.89<br>606<br>1 | 1.61<br>E-<br>07 | 8.03<br>E-<br>06 | 6.46<br>E-<br>06 |
| 10 | PID_NFAT_TF_PATHWAY                                           | 0.85<br>207      | 1.87<br>394<br>7 | 8.24<br>E-<br>07 | 3.52<br>E-<br>05 | 2.83<br>E-<br>05 |
| 11 | REACTOME_PEPTIDE_LIGAND_BINDING_RECEPTORS                     | 0.69<br>756<br>4 | 1.86<br>370<br>4 | 5.02<br>E-<br>07 | 2.20<br>E-<br>05 | 1.77<br>E-<br>05 |
| 12 | PID_FGF_PATHWAY                                               | 0.79<br>351<br>4 | 1.85<br>478<br>4 | 5.28<br>E-<br>06 | 0.00<br>018<br>3 | 0.00<br>014<br>7 |
| 13 | REACTOME_INTERLEUKIN_10_SIGNALING                             | 0.83<br>913<br>9 | 1.84<br>550<br>9 | 1.94<br>E-<br>06 | 7.60<br>E-<br>05 | 6.10<br>E-<br>05 |
| 14 | REACTOME_O_LINKED_GLYCOSYLATION                               | 0.72<br>044<br>1 | 1.84<br>098<br>3 | 1.72<br>E-<br>06 | 6.85<br>E-<br>05 | 5.51<br>E-<br>05 |
| 15 | REACTOME_COLLAGEN_DEGRADATION                                 | 0.78<br>211<br>3 | 1.84<br>046<br>1 | 1.10<br>E-<br>05 | 0.00<br>035<br>8 | 0.00<br>028<br>8 |
| 16 | REACTOME_COLLAGEN_FORMATION                                   | 0.73<br>136<br>9 | 1.83<br>446<br>8 | 3.45<br>E-<br>06 | 0.00<br>012<br>7 | 0.00<br>010<br>2 |
| 17 | KEGG_LEISHMANIA_INFECTION                                     | 0.76<br>030<br>8 | 1.81<br>101<br>3 | 4.88<br>E-<br>05 | 0.00<br>127      | 0.00<br>102<br>1 |
| 18 | REACTOME_DISEASES_ASSOCIATED_WITH_O_GLYCOSYLATION_OF_PROTEINS | 0.76<br>069<br>8 | 1.80<br>298      | 1.62<br>E-<br>05 | 0.00<br>049<br>3 | 0.00<br>039<br>6 |
| 19 | REACTOME_CELL_CELL_COMMUNICATION                              | 0.68<br>711<br>5 | 1.80<br>047      | 5.30<br>E-<br>06 | 0.00<br>018<br>3 | 0.00<br>014<br>7 |
| 20 | REACTOME_CELL_SURFACE_INTERACTIONS_AT_THE_VASCULAR_WALL       | 0.69<br>216<br>9 | 1.79<br>914      | 5.21<br>E-<br>06 | 0.00<br>018<br>3 | 0.00<br>014<br>7 |



| No | ID                                                                                | ES               | NE S             | pva l            | p.a dj           | qva l            |
|----|-----------------------------------------------------------------------------------|------------------|------------------|------------------|------------------|------------------|
| 21 | PID_INTEGRIN2_PATHWAY                                                             | 0.90<br>230<br>9 | 1.79<br>138<br>9 | 1.77<br>E-<br>05 | 0.00<br>053      | 0.00<br>042<br>6 |
| 22 | PID_ATF2_PATHWAY                                                                  | 0.77<br>109<br>3 | 1.78<br>535<br>4 | 3.36<br>E-<br>05 | 0.00<br>093      | 0.00<br>074<br>7 |
| 23 | REACTOME_INTERFERON_GAMMA_SIGNALING                                               | 0.70<br>789<br>5 | 1.77<br>558<br>9 | 2.22<br>E-<br>05 | 0.00<br>064<br>4 | 0.00<br>051<br>7 |
| 24 | KEGG_ADHERENS_JUNCTION                                                            | 0.71<br>332      | 1.76<br>742<br>7 | 8.64<br>E-<br>05 | 0.00<br>201<br>6 | 0.00<br>162      |
| 25 | PID_IL27_PATHWAY                                                                  | 0.87<br>791<br>5 | 1.76<br>377<br>8 | 7.65<br>E-<br>05 | 0.00<br>183<br>3 | 0.00<br>147<br>3 |
| 26 | REACTOME_COLLAGEN_BIOSYNTHESIS_AND_MODIFYING_ENZYMES                              | 0.72<br>757<br>3 | 1.75<br>965<br>9 | 0.00<br>013<br>4 | 0.00<br>264      | 0.00<br>212<br>2 |
| 27 | REACTOME_INTEGRIN_CELL_SURFACE_INTERACTIONS                                       | 0.70<br>268<br>5 | 1.75<br>815<br>7 | 5.29<br>E-<br>05 | 0.00<br>133<br>8 | 0.00<br>107<br>5 |
| 28 | PID_INTEGRIN_A9B1_PATHWAY                                                         | 0.86<br>320<br>5 | 1.75<br>407<br>4 | 0.00<br>012      | 0.00<br>251<br>7 | 0.00<br>202<br>3 |
| 29 | REACTOME_CELL_JUNCTION_ORGANIZATION                                               | 0.70<br>059<br>7 | 1.75<br>335<br>1 | 9.49<br>E-<br>05 | 0.00<br>215<br>9 | 0.00<br>173<br>5 |
| 30 | REACTOME_DISEASES_OF_GLYCOSYLATION                                                | 0.65<br>560<br>4 | 1.75<br>159<br>7 | 2.38<br>E-<br>05 | 0.00<br>067<br>9 | 0.00<br>054<br>5 |
| 31 | PID_S1P_S1P3_PATHWAY                                                              | 0.82<br>841<br>9 | 1.75<br>021<br>9 | 0.00<br>019<br>3 | 0.00<br>341<br>7 | 0.00<br>274<br>7 |
| 32 | PID_IL12_2PATHWAY                                                                 | 0.74<br>058      | 1.74<br>272<br>6 | 0.00<br>019<br>4 | 0.00<br>341<br>7 | 0.00<br>274<br>7 |
| 33 | PID_TCR_CALCIIUM_PATHWAY                                                          | 0.84<br>307<br>3 | 1.74<br>051<br>3 | 0.00<br>032<br>8 | 0.00<br>531<br>2 | 0.00<br>426<br>9 |
| 34 | PID_SHP2_PATHWAY                                                                  | 0.73<br>843<br>7 | 1.73<br>554<br>4 | 0.00<br>013<br>4 | 0.00<br>264      | 0.00<br>212<br>2 |
| 35 | PID_FRA_PATHWAY                                                                   | 0.78<br>792      | 1.73<br>286<br>2 | 0.00<br>013<br>7 | 0.00<br>264      | 0.00<br>212<br>2 |
| 36 | PID_IL12_STAT4_PATHWAY                                                            | 0.83<br>630<br>8 | 1.72<br>654<br>7 | 0.00<br>049<br>1 | 0.00<br>729<br>8 | 0.00<br>586<br>6 |
| 37 | BIOCARTA_INFLAM_PATHWAY                                                           | 0.91<br>205<br>8 | 1.72<br>492<br>3 | 5.84<br>E-<br>05 | 0.00<br>143<br>6 | 0.00<br>115<br>4 |
| 38 | REACTOME_CELL_CELL_JUNCTION_ORGANIZATION                                          | 0.73<br>248<br>9 | 1.72<br>156<br>7 | 0.00<br>016<br>1 | 0.00<br>298<br>5 | 0.00<br>239<br>9 |
| 39 | REACTOME_CONSTITUTIVE_SIGNALING_BY_ABERRANT_PI3K_IN_CANCER                        | 0.69<br>409<br>8 | 1.71<br>974<br>8 | 0.00<br>039<br>7 | 0.00<br>609<br>8 | 0.00<br>490<br>1 |
| 40 | REACTOME_PHASE_I_FUNCTIONALIZATION_OF_COMPOUNDS                                   | 0.69<br>277      | 1.71<br>955<br>6 | 0.00<br>028<br>9 | 0.00<br>476<br>7 | 0.00<br>383<br>1 |
| 41 | REACTOME_NGF_STIMULATED_TRANSCRIPTION                                             | 0.76<br>835<br>6 | 1.71<br>684<br>8 | 0.00<br>031      | 0.00<br>507<br>2 | 0.00<br>407<br>6 |
| 42 | REACTOME_O_GLYCOSYLATION_OF_TSR_DOMAIN_CONTAINING_PROTEINS                        | 0.77<br>093<br>7 | 1.71<br>645<br>3 | 0.00<br>034<br>1 | 0.00<br>547<br>9 | 0.00<br>440<br>3 |
| 43 | PID_GLYPICAN_IPATHWAY                                                             | 0.83<br>083<br>8 | 1.71<br>525<br>3 | 0.00<br>066<br>8 | 0.00<br>922<br>7 | 0.00<br>741<br>6 |
| 44 | REACTOME_IMMUNOREGULATORY_INTERACTIONS_BETWEEN_A_LYMPHOID_AND_A_NON_LYMPHOID_CELL | 0.68<br>021<br>6 | 1.71<br>139<br>7 | 0.00<br>023<br>9 | 0.00<br>409<br>9 | 0.00<br>329<br>4 |

|    |                                                                                                                                          |                  |                  |                  |                  |                  |
|----|------------------------------------------------------------------------------------------------------------------------------------------|------------------|------------------|------------------|------------------|------------------|
| 45 | PID_TCPTP_PATHWAY                                                                                                                        | 0.76<br>072<br>4 | 1.70<br>890<br>3 | 0.00<br>043<br>5 | 0.00<br>662<br>6 | 0.00<br>532<br>5 |
| 46 | REACTOME_UNFOLDED_PROTEIN_RESPONSE_UPR                                                                                                   | 0.67<br>030<br>8 | 1.70<br>478      | 0.00<br>010<br>8 | 0.00<br>233<br>8 | 0.00<br>187<br>9 |
| 47 | REACTOME_REGULATION_OF_INSULIN_LIKE_GROWTH_FACTOR_IGF_TRANS<br>PORT_AND_UPTAKE_BY_INSULIN_LIKE_GROWTH_FACTOR_BINDING_PROTEI<br>NS_IGFBPS | 0.66<br>128<br>4 | 1.70<br>260<br>4 | 0.00<br>010<br>9 | 0.00<br>233<br>8 | 0.00<br>187<br>9 |
| 48 | REACTOME_ASSEMBLY_OF_COLLAGEN_FIBRILS_AND_OTHER_MULTIMERIC_<br>STRUCTURES                                                                | 0.72<br>435<br>4 | 1.70<br>244<br>6 | 0.00<br>026<br>6 | 0.00<br>441<br>9 | 0.00<br>355<br>1 |
| 49 | REACTOME_CHEMOKINE_RECEPTORS_BIND_CHEMOKINES                                                                                             | 0.76<br>064<br>3 | 1.69<br>961<br>3 | 0.00<br>048<br>6 | 0.00<br>728<br>2 | 0.00<br>585<br>2 |
| 50 | REACTOME_ADHERENS_JUNCTIONS_INTERACTIONS                                                                                                 | 0.79<br>584<br>8 | 1.69<br>751<br>1 | 0.00<br>045<br>4 | 0.00<br>686<br>2 | 0.00<br>551<br>5 |

**Supplementary table 7a: Human retinal microglia (GSE148077) -SenMayo-hi vs SenMayo-low –GSEA pathway enrichment terms – top 30 terms (FDR-qvalue < 0.05, NES > 1.5). Legend for Fig 5c- refer to top 20 terms.**

| No | ID                                                      | ES           | NES          | pval         | p.adj        | qval         |
|----|---------------------------------------------------------|--------------|--------------|--------------|--------------|--------------|
| 1  | REACTOME_PEPTIDE_LIGAND_BINDING_RECEPTORS               | 0.81218      | 2.28287<br>8 | 1.00E-<br>10 | 1.83E-<br>08 | 1.54E-<br>08 |
| 2  | KEGG_CYTOKINE_CYTOKINE_RECEPTOR_INTERACTION             | 0.78128<br>6 | 2.26889<br>2 | 1.00E-<br>10 | 1.83E-<br>08 | 1.54E-<br>08 |
| 3  | REACTOME_INTERLEUKIN_4_AND_INTERLEUKIN_13_SIGN<br>ALING | 0.80669<br>5 | 2.19115<br>6 | 1.73E-<br>10 | 2.88E-<br>08 | 2.42E-<br>08 |
| 4  | REACTOME_INTERLEUKIN_10_SIGNALING                       | 0.90787<br>5 | 2.13720<br>8 | 1.12E-<br>07 | 9.32E-<br>06 | 7.84E-<br>06 |
| 5  | REACTOME_CHEMOKINE_RECEPTORS_BIND_CHEMOKINES            | 0.89650<br>9 | 2.12872<br>8 | 1.74E-<br>08 | 2.12E-<br>06 | 1.79E-<br>06 |
| 6  | KEGG_LEISHMANIA_INFECTON                                | 0.83996<br>1 | 2.11181<br>4 | 2.52E-<br>08 | 2.87E-<br>06 | 2.41E-<br>06 |
| 7  | REACTOME_CLASS_A_1_RHODOPSIN_LIKE_RECEPTORS             | 0.70169<br>3 | 2.08830<br>8 | 1.00E-<br>10 | 1.83E-<br>08 | 1.54E-<br>08 |
| 8  | KEGG_COMPLEMENT_AND_COAGULATION_CASCADES                | 0.83664<br>6 | 2.06134<br>5 | 2.77E-<br>07 | 2.03E-<br>05 | 1.71E-<br>05 |
| 9  | KEGG_INTESTINAL_IMMUNE_NETWORK_FOR_IGA_PRODU<br>CTION   | 0.86043<br>6 | 2.02553<br>1 | 1.29E-<br>05 | 0.00049<br>3 | 0.00041<br>4 |
| 10 | PID_FRA_PATHWAY                                         | 0.87239<br>2 | 2.00563<br>2 | 7.42E-<br>06 | 0.00031<br>6 | 0.00026<br>6 |
| 11 | REACTOME_INTERFERON_GAMMA_SIGNALING                     | 0.74348<br>9 | 1.99163<br>6 | 1.18E-<br>06 | 7.00E-<br>05 | 5.89E-<br>05 |
| 12 | KEGG_SYSTEMIC_LUPUS_ERYTHEMATOSUS                       | 0.82019<br>8 | 1.98420<br>9 | 9.85E-<br>06 | 0.00038<br>4 | 0.00032<br>3 |
| 13 | PID_API_PATHWAY                                         | 0.79206<br>5 | 1.96502<br>4 | 2.57E-<br>06 | 0.00013<br>5 | 0.00011<br>3 |
| 14 | KEGG_AUTOIMMUNE_THYROID_DISEASE                         | 0.86772<br>2 | 1.96432<br>9 | 2.54E-<br>05 | 0.00088      | 0.00074      |
| 15 | PID_NFAT_TFPATHWAY                                      | 0.83907<br>1 | 1.95760<br>1 | 6.65E-<br>05 | 0.00174<br>8 | 0.00147<br>1 |
| 16 | KEGG_TOLL_LIKE_RECEPTOR_SIGNALING_PATHWAY               | 0.73598<br>7 | 1.95441<br>5 | 5.25E-<br>06 | 0.00025<br>3 | 0.00021<br>3 |
| 17 | KEGG_ALLOGRAFT_REJECTION                                | 0.87333<br>5 | 1.94759      | 2.62E-<br>05 | 0.00088<br>7 | 0.00074<br>7 |
| 18 | KEGG_ASTHMA                                             | 0.94062<br>3 | 1.94688<br>9 | 7.86E-<br>06 | 0.00032<br>7 | 0.00027<br>5 |
| 19 | PID_IL23_PATHWAY                                        | 0.87115<br>2 | 1.94272<br>3 | 2.81E-<br>05 | 0.0009       | 0.00075<br>7 |
| 20 | BIOCARTA_NKT_PATHWAY                                    | 0.93476<br>7 | 1.93476<br>9 | 1.34E-<br>05 | 0.00050<br>2 | 0.00042<br>3 |
| 21 | KEGG_GRAFT_VERSUS_HOST_DISEASE                          | 0.85335<br>5 | 1.90104<br>9 | 6.87E-<br>05 | 0.00176<br>3 | 0.00148<br>3 |
| 22 | BIOCARTA_INFLAM_PATHWAY                                 | 0.92436<br>1 | 1.88400      | 5.86E-<br>05 | 0.00160<br>2 | 0.00134<br>8 |
| 23 | KEGG_TYPE_I_DIABETES_MELLITUS                           | 0.80064<br>3 | 1.86075<br>7 | 0.00033<br>8 | 0.00620<br>2 | 0.00521<br>8 |
| 24 | KEGG_ANTIGEN_PROCESSING_AND_PRESENTATION                | 0.73932<br>4 | 1.82728<br>1 | 0.00014<br>7 | 0.00313<br>4 | 0.00263<br>6 |

| No | Description                              | ES       | NES      | pval     | p.adj    | qval     |
|----|------------------------------------------|----------|----------|----------|----------|----------|
| 25 | BIOCARTA_NTH1_PATHWAY                    | 0.880643 | 1.826771 | 0.000484 | 0.008176 | 0.006879 |
| 26 | BIOCARTA_TH1TH2_PATHWAY                  | 0.919942 | 1.826087 | 0.000116 | 0.002698 | 0.00227  |
| 27 | KEGG_HEMATOPOIETIC_CELL_LINEAGE          | 0.711289 | 1.823674 | 5.36E-05 | 0.001488 | 0.001252 |
| 28 | KEGG_VIRAL_MYOCARDITIS                   | 0.732814 | 1.818835 | 0.000196 | 0.003946 | 0.00332  |
| 29 | REACTOME_SCAVENGING_BY_CLASS_A_RECEPTORS | 0.897849 | 1.782232 | 0.000462 | 0.007907 | 0.006652 |
| 30 | KEGG_NOD_LIKE_RECEPTOR_SIGNALING_PATHWAY | 0.718173 | 1.769449 | 0.000322 | 0.006094 | 0.005127 |

**Supplementary table 7b: Human retinal Mueller glia (GSE148077) -SenMayo-hi vs SenMayo-low –GSEA pathway enrichment terms – top 30 terms (FDR-qvalue < 0.05, NES > 1.5). Legend for Fig 5d- refer to top 20 terms.**

| No | Description                                                        | ES       | NES      | pval     | p.adj    | qval     |
|----|--------------------------------------------------------------------|----------|----------|----------|----------|----------|
| 1  | REACTOME_RESPONSE_OF_EIF2AK4_GCN2_TO_AMINO_ACID_DEFICIENCY         | 0.834127 | 1.997514 | 7.02E-09 | 1.84E-06 | 1.65E-06 |
| 2  | REACTOME_EUKARYOTIC_TRANSLATION_ELONGATION                         | 0.843902 | 1.992297 | 1.19E-08 | 2.43E-06 | 2.18E-06 |
| 3  | KEGG_RIBOSOME                                                      | 0.840627 | 1.968646 | 6.09E-08 | 1.02E-05 | 9.10E-06 |
| 4  | KEGG_CYTOKINE_CYTOKINE_RECEPTOR_INTERACTION                        | 0.745742 | 1.942426 | 1.13E-09 | 3.46E-07 | 3.10E-07 |
| 5  | REACTOME_SELENOAMINO_ACID_METABOLISM                               | 0.797735 | 1.91338  | 2.94E-07 | 4.15E-05 | 3.72E-05 |
| 6  | REACTOME_CHEMOKINE_RECEPTORS_BIND_CHEMOKINES                       | 0.905215 | 1.886394 | 6.11E-07 | 7.00E-05 | 6.27E-05 |
| 7  | REACTOME_NONSENSE_MEDIATED_DECAY_NMD                               | 0.779545 | 1.873252 | 3.88E-07 | 4.85E-05 | 4.35E-05 |
| 8  | REACTOME_INTERLEUKIN_10_SIGNALING                                  | 0.89762  | 1.84359  | 4.19E-06 | 0.00034  | 0.000299 |
| 9  | PID_NFAT_TFPATHWAY                                                 | 0.900024 | 1.840551 | 2.50E-06 | 0.000241 | 0.000216 |
| 10 | REACTOME_EUKARYOTIC_TRANSLATION_INITIATION                         | 0.759408 | 1.833904 | 4.45E-06 | 0.00034  | 0.000304 |
| 11 | REACTOME_INTERLEUKIN_4_AND_INTERLEUKIN_13_SIGNALING                | 0.75807  | 1.815378 | 9.63E-06 | 0.000608 | 0.000545 |
| 12 | PID_P53_DOWNSTREAM_PATHWAY                                         | 0.717056 | 1.76282  | 9.41E-06 | 0.000608 | 0.000545 |
| 13 | KEGG_NOD_LIKE_RECEPTOR_SIGNALING_PATHWAY                           | 0.799599 | 1.757325 | 0.000134 | 0.004714 | 0.004226 |
| 14 | REACTOME_NGF_STIMULATED_TRANSCRIPTION                              | 0.852726 | 1.74253  | 0.000259 | 0.007914 | 0.007094 |
| 15 | REACTOME_RRNA_PROCESSING                                           | 0.671617 | 1.716055 | 7.04E-06 | 0.000497 | 0.000445 |
| 16 | PID_IL6_7_PATHWAY                                                  | 0.818869 | 1.706456 | 0.000592 | 0.014091 | 0.012631 |
| 17 | REACTOME_NUCLEAR_EVENTS_KINASE_AND_TRANSCRIPTION_FACTOR_ACTIVATION | 0.764352 | 1.701678 | 0.000546 | 0.013352 | 0.011969 |
| 18 | PID_FRA_PATHWAY                                                    | 0.834438 | 1.699974 | 0.000382 | 0.010142 | 0.009091 |
| 19 | REACTOME_CELLULAR_RESPONSE_TO_STARVATION                           | 0.676243 | 1.686687 | 6.92E-05 | 0.002881 | 0.002582 |
| 20 | PID_HIV_NEF_PATHWAY                                                | 0.843516 | 1.677034 | 0.001381 | 0.027214 | 0.024395 |
| 21 | PID_HIF1_TFPATHWAY                                                 | 0.741297 | 1.675015 | 0.000634 | 0.01472  | 0.013196 |
| 22 | REACTOME_INFLUENZA_INFECTION                                       | 0.666711 | 1.674684 | 8.77E-05 | 0.003417 | 0.003063 |
| 23 | PID_API1_PATHWAY                                                   | 0.739496 | 1.670945 | 0.000666 | 0.015069 | 0.013508 |
| 24 | REACTOME_PEPTIDE_LIGAND_BINDING_RECEPTORS                          | 0.655179 | 1.652596 | 9.39E-05 | 0.003442 | 0.003085 |
| 25 | PID_IL12_STAT4_PATHWAY                                             | 0.840236 | 1.642522 | 0.002685 | 0.04543  | 0.040725 |
| 26 | REACTOME_GENERATION_OF_SECOND_MESSENGER_MOLECULES                  | 0.835741 | 1.642127 | 0.001982 | 0.035617 | 0.031928 |

| No | ID                            | ES       | NES      | pval     | p.adj    | qval     |
|----|-------------------------------|----------|----------|----------|----------|----------|
| 27 | BIOCARTA_HIVNEF_PATHWAY       | 0.751025 | 1.63143  | 0.001433 | 0.027496 | 0.024649 |
| 28 | PID_ATF2_PATHWAY              | 0.745644 | 1.624164 | 0.001766 | 0.033039 | 0.029617 |
| 29 | PID_IL12_2PATHWAY             | 0.741404 | 1.619714 | 0.001455 | 0.027496 | 0.024649 |
| 30 | BIOCARTA_GRANULOCYTES_PATHWAY | 0.956674 | 1.616256 | 0.000318 | 0.008893 | 0.007972 |

Supplementary table 7c: Human retinal astrocytes (GSE148077) -SenMayo-hi vs SenMayo-low –GSEA pathway enrichment terms – top 30 terms (FDR-qvalue < 0.05, NES > 1.5). Legend for Supp fig 5a- refer to top 20 terms.

| No | ID                                                                                                             | ES       | NES      | pval     | p.adj    | qval     |
|----|----------------------------------------------------------------------------------------------------------------|----------|----------|----------|----------|----------|
| 1  | REACTOME_RESPONSE_OF EIF2AK4_GCN2_TO_AMINO_ACID_DEFICIENCY                                                     | 0.789653 | 2.244382 | 1.00E-10 | 9.17E-08 | 8.32E-08 |
| 2  | REACTOME_EUKARYOTIC_TRANSLATION_ELONGATION                                                                     | 0.803945 | 2.244175 | 1.00E-10 | 9.17E-08 | 8.32E-08 |
| 3  | KEGG_RIBOSOME                                                                                                  | 0.778534 | 2.15139  | 2.53E-09 | 1.16E-06 | 1.05E-06 |
| 4  | REACTOME_CELLULAR_RESPONSE_TO_STARVATION                                                                       | 0.698754 | 2.092566 | 1.45E-09 | 8.87E-07 | 8.05E-07 |
| 5  | REACTOME_EUKARYOTIC_TRANSLATION_INITIATION                                                                     | 0.723646 | 2.076676 | 3.21E-09 | 1.18E-06 | 1.07E-06 |
| 6  | PID_HIF1_TFPATHWAY                                                                                             | 0.773086 | 2.044637 | 1.03E-06 | 0.00021  | 0.000191 |
| 7  | REACTOME_SELENOAMINO_ACID_METABOLISM                                                                           | 0.707968 | 2.026849 | 3.47E-07 | 9.10E-05 | 8.25E-05 |
| 8  | PID_API_PATHWAY                                                                                                | 0.759936 | 2.00986  | 2.69E-06 | 0.000449 | 0.000407 |
| 9  | REACTOME_INTERLEUKIN_4_AND_INTERLEUKIN_13_SIGNALING                                                            | 0.694876 | 1.975003 | 2.06E-06 | 0.000377 | 0.000342 |
| 10 | REACTOME_CHEMOKINE_RECEPTORS_BIND_CHEMOKINES                                                                   | 0.801381 | 1.963701 | 8.55E-06 | 0.001119 | 0.001016 |
| 11 | REACTOME_NONSENSE_MEDIATED_DECAY_NMD                                                                           | 0.672489 | 1.93453  | 9.23E-07 | 0.00021  | 0.000191 |
| 12 | PID_FRA_PATHWAY                                                                                                | 0.804846 | 1.909859 | 3.15E-05 | 0.002885 | 0.002618 |
| 13 | PID_IL23_PATHWAY                                                                                               | 0.820421 | 1.90554  | 7.07E-05 | 0.00054  | 0.00049  |
| 14 | KEGG_NOD_LIKE_RECEPTOR_SIGNALING_PATHWAY                                                                       | 0.729771 | 1.901911 | 2.92E-05 | 0.002821 | 0.002559 |
| 15 | REACTOME_SRP_DEPENDENT_COTRANSLATIONAL_PROTEIN_TARGETING_TO_MEMBRANE                                           | 0.657123 | 1.882321 | 1.30E-05 | 0.001489 | 0.001351 |
| 16 | REACTOME_INTERLEUKIN_10_SIGNALING                                                                              | 0.771088 | 1.854483 | 0.000111 | 0.007839 | 0.007113 |
| 17 | KEGG_CYTOKINE_CYTOKINE_RECEPTOR_INTERACTION                                                                    | 0.59504  | 1.837039 | 2.32E-07 | 7.09E-05 | 6.44E-05 |
| 18 | PID_TAP63_PATHWAY                                                                                              | 0.723098 | 1.836051 | 8.02E-05 | 0.005878 | 0.005333 |
| 19 | PID_HIF2PATHWAY                                                                                                | 0.788605 | 1.831642 | 0.000301 | 0.016723 | 0.015173 |
| 20 | REACTOME_INFLUENZA_INFECTION                                                                                   | 0.608098 | 1.825568 | 4.11E-06 | 0.000579 | 0.000525 |
| 21 | PID_P53_DOWNSTREAM_PATHWAY                                                                                     | 0.619174 | 1.813956 | 1.19E-05 | 0.001456 | 0.001321 |
| 22 | BIOCARTA_LAIR_PATHWAY                                                                                          | 0.912272 | 1.811718 | 6.20E-05 | 0.004942 | 0.004484 |
| 23 | PID_DELTA_NP63_PATHWAY                                                                                         | 0.74048  | 1.797287 | 0.000444 | 0.023243 | 0.021089 |
| 24 | PID_ATF2_PATHWAY                                                                                               | 0.684028 | 1.761698 | 0.001193 | 0.046515 | 0.042205 |
| 25 | REACTOME_ACTIVATION_OF_THE_MRNA_UPON_BINDING_OF_THE_CAP_BINDING_COMPLEX_AND_EIFS_AND_SUBSEQUENT_BINDING_TO_43S | 0.675497 | 1.759778 | 0.000706 | 0.030268 | 0.027463 |
| 26 | BIOCARTA_GRANULOCYTES_PATHWAY                                                                                  | 0.89729  | 1.733212 | 0.000704 | 0.030268 | 0.027463 |
| 27 | BIOCARTA_GHRELIN_PATHWAY                                                                                       | 0.945468 | 1.707186 | 0.000292 | 0.016723 | 0.015173 |
| 28 | PID_CMYB_PATHWAY                                                                                               | 0.620718 | 1.698656 | 0.001363 | 0.049048 | 0.044504 |

| No | ID                                                      | ES           | NES          | pval         | p.adj        | qval         |
|----|---------------------------------------------------------|--------------|--------------|--------------|--------------|--------------|
| 29 | REACTOME_RRNA_PROCESSING                                | 0.54<br>3455 | 1.65<br>8366 | 5.45<br>E-05 | 0.00<br>4755 | 0.00<br>4315 |
| 30 | REACTOME_CELL_SURFACE_INTERACTIONS_AT_THE_VASCULAR_WALL | 0.54<br>4773 | 1.59<br>5989 | 0.00<br>0716 | 0.03<br>0268 | 0.02<br>7463 |

**Supplementary table 8a: DEG list for mouse Mueller glia: 12-mo vs 3-mo (pvaladj < 0.01, |LFC| > 0.25, top 25 up and downregulated)**

| Genes  | pval      | avg_log2 FC | pct. 1 | pct. 2 | p.adj     |
|--------|-----------|-------------|--------|--------|-----------|
| Prss56 | 6.21E-152 | 1.478028    | 0.313  | 0.113  | 1.29E-147 |
| Xist   | 5.95E-144 | 1.326191    | 0.27   | 0.037  | 1.24E-139 |
| Nupr1  | 0         | 1.19632     | 0.673  | 0.323  | 0         |
| Ifit1  | 4.31E-149 | 1.19426     | 0.212  | 0.042  | 8.96E-145 |
| Ifit3  | 1.33E-43  | 1.064545    | 0.397  | 0.273  | 2.77E-39  |
| Isg15  | 5.87E-83  | 1.018049    | 0.173  | 0.055  | 1.22E-78  |
| Ifi27  | 1.44E-269 | 1.015639    | 0.519  | 0.203  | 3.00E-265 |
| Rho    | 0         | 1.001992    | 0.908  | 0.607  | 0         |
| Gnat1  | 1.06E-268 | 0.911875    | 0.703  | 0.347  | 2.21E-264 |
| Rsad2  | 7.10E-97  | 0.822608    | 0.138  | 0.025  | 1.48E-92  |
| Mt3    | 2.86E-180 | 0.797387    | 0.684  | 0.439  | 5.95E-176 |
| Opn1sw | 6.69E-85  | 0.772684    | 0.277  | 0.121  | 1.39E-80  |
| Rom1   | 1.91E-147 | 0.742135    | 0.625  | 0.355  | 3.96E-143 |
| Pde6h  | 4.02E-76  | 0.734459    | 0.295  | 0.141  | 8.36E-72  |
| Rcvrn  | 7.03E-113 | 0.725375    | 0.403  | 0.192  | 1.46E-108 |
| Necab2 | 4.11E-166 | 0.700342    | 0.428  | 0.182  | 8.54E-162 |
| Prph2  | 1.45E-116 | 0.677221    | 0.471  | 0.241  | 3.02E-112 |
| Guca1a | 1.94E-93  | 0.675987    | 0.417  | 0.222  | 4.04E-89  |
| Pdc    | 3.23E-117 | 0.668942    | 0.574  | 0.329  | 6.72E-113 |
| Rpl38  | 3.81E-270 | 0.64499     | 0.929  | 0.933  | 7.92E-266 |
| Rpl    | 3.71E-106 | 0.630189    | 0.364  | 0.164  | 7.71E-102 |
| Rbp3   | 5.17E-86  | 0.624273    | 0.353  | 0.176  | 1.08E-81  |
| Gnb1   | 1.18E-117 | 0.610353    | 0.784  | 0.571  | 2.45E-113 |
| Rpl35  | 4.28E-133 | 0.608803    | 0.792  | 0.682  | 8.91E-129 |
| Pde6g  | 2.16E-105 | 0.595803    | 0.533  | 0.303  | 4.49E-101 |

| Genes   | pval      | avg_log2 FC | pct. 1 | pct. 2 | p.adj     |
|---------|-----------|-------------|--------|--------|-----------|
| Slc1a3  | 1.58E-249 | -0.54414    | 0.798  | 0.925  | 3.29E-245 |
| Kdr     | 1.37E-166 | -0.54908    | 0.757  | 0.874  | 2.85E-162 |
| mt-Nd2  | 0         | -0.54964    | 0.991  | 0.997  | 0         |
| Hist1hb | 8.46E-34  | -0.55177    | 0.121  | 0.192  | 1.76E-29  |
| Chst2   | 5.70E-131 | -0.56556    | 0.507  | 0.623  | 1.18E-126 |
| Col9a1  | 5.42E-121 | -0.56756    | 0.618  | 0.722  | 1.13E-116 |
| Plk2    | 3.34E-52  | -0.57112    | 0.236  | 0.333  | 6.94E-48  |
| Mt1     | 4.36E-202 | -0.57879    | 0.856  | 0.942  | 9.07E-198 |
| Etnppl  | 5.29E-64  | -0.58212    | 0.391  | 0.485  | 1.10E-59  |
| Abca8a  | 6.69E-282 | -0.61959    | 0.809  | 0.919  | 1.39E-277 |
| Itgb8   | 5.31E-138 | -0.63436    | 0.347  | 0.57   | 1.10E-133 |
| Dkk3    | 0         | -0.64048    | 0.869  | 0.949  | 0         |
| Utp14b  | 1.04E-144 | -0.66757    | 0.617  | 0.722  | 2.17E-140 |
| Hist1he | 3.91E-240 | -0.69669    | 0.518  | 0.746  | 8.13E-236 |
| Spc25   | 9.64E-308 | -0.7042     | 0.796  | 0.945  | 2.00E-303 |
| Galnt13 | 2.62E-214 | -0.70676    | 0.153  | 0.373  | 5.45E-210 |
| Dio2    | 7.79E-135 | -0.73206    | 0.225  | 0.386  | 1.62E-130 |
| Eno1b   | 1.68E-214 | -0.73679    | 0.476  | 0.648  | 3.49E-210 |
| Ccn2    | 2.14E-39  | -0.73743    | 0.315  | 0.394  | 4.45E-35  |
| Slmap   | 1.15E-304 | -0.75615    | 0.761  | 0.875  | 2.39E-300 |
| Fosb    | 3.59E-183 | -0.79954    | 0.718  | 0.838  | 7.47E-179 |
| Dbp     | 0         | -0.90966    | 0.636  | 0.838  | 0         |
| mt-Atp8 | 0         | -0.99264    | 0.668  | 0.896  | 0         |
| Ciart   | 2.37E-283 | -1.00428    | 0.151  | 0.411  | 4.92E-279 |
| Car14   | 0         | -1.07032    | 0.765  | 0.912  | 0         |

**Supplementary table 8b: DEG list for mouse Mueller glia: 24-mo vs 3-mo (pvaladj < 0.01, |LFC| > 0.25, top 25 up and downregulated)**

| Genes          | pval      | avg_log2 FC | pct. 1 | pct. 2 | p.adj     |
|----------------|-----------|-------------|--------|--------|-----------|
| Bcl115         | 2.19E-115 | 2.16122     | 0.741  | 0.371  | 4.56E-111 |
| Rpl237         | 1.05E-237 | 2.074836    | 0.73   | 0.164  | 2.19E-233 |
| Rho206         | 4.06E-206 | 1.925375    | 0.989  | 0.607  | 8.44E-202 |
| Rpgrip1        | 5.41E-137 | 1.837112    | 0.606  | 0.182  | 1.13E-132 |
| Pdc168         | 5.81E-168 | 1.805171    | 0.843  | 0.329  | 1.21E-163 |
| Pde6b160       | 9.54E-160 | 1.765033    | 0.562  | 0.131  | 1.98E-155 |
| Gnat1159       | 6.13E-159 | 1.733958    | 0.841  | 0.347  | 1.27E-154 |
| Pde6a148       | 1.10E-148 | 1.667705    | 0.492  | 0.107  | 2.29E-144 |
| Pde6g110       | 1.37E-110 | 1.5974      | 0.727  | 0.303  | 2.84E-106 |
| Rcvrn107       | 1.73E-107 | 1.581029    | 0.573  | 0.192  | 3.59E-103 |
| Rom1114        | 2.82E-114 | 1.570666    | 0.773  | 0.35   | 5.87E-110 |
| Kcnb1107       | 2.67E-107 | 1.549813    | 0.552  | 0.182  | 5.56E-103 |
| Mir124a-1hg131 | 1.04E-131 | 1.532951    | 0.43   | 0.09   | 2.15E-127 |
| Tulp199        | 3.38E-99  | 1.526832    | 0.584  | 0.208  | 7.02E-95  |
| Mir124-2hg94   | 6.19E-94  | 1.479731    | 0.546  | 0.193  | 1.29E-89  |
| Nr2e3142       | 7.20E-142 | 1.470954    | 0.414  | 0.076  | 1.50E-137 |
| Gm42418218     | 1.91E-218 | 1.456251    | 1      | 1      | 3.97E-214 |
| Hk272          | 1.45E-72  | 1.453487    | 0.417  | 0.141  | 3.01E-68  |
| Guc1a101       | 8.57E-101 | 1.436068    | 0.606  | 0.222  | 1.78E-96  |
| Sag108         | 4.76E-108 | 1.428923    | 0.784  | 0.382  | 9.89E-104 |
| Slc24a172      | 6.83E-72  | 1.419624    | 0.465  | 0.17   | 1.42E-67  |
| Prph2112       | 4.65E-112 | 1.418754    | 0.662  | 0.241  | 9.66E-108 |
| Gnb185         | 8.19E-85  | 1.365061    | 0.843  | 0.571  | 1.70E-80  |
| Gngt1120       | 5.59E-120 | 1.358523    | 0.895  | 0.478  | 1.16E-115 |
| Neurod172      | 7.74E-72  | 1.358507    | 0.389  | 0.121  | 1.61E-67  |

| Genes     | pval      | avg_log2 FC | pct. 1 | pct. 2 | p.adj     |
|-----------|-----------|-------------|--------|--------|-----------|
| Car1493   | 1.43E-93  | -1.0435     | 0.632  | 0.912  | 2.97E-89  |
| Gm2653236 | 3.85E-36  | -1.05593    | 0.143  | 0.378  | 8.01E-32  |
| Hes528    | 7.06E-28  | -1.05992    | 0.41   | 0.604  | 1.47E-23  |
| Timp380   | 1.72E-80  | -1.07038    | 0.548  | 0.868  | 3.57E-76  |
| Gas140    | 1.27E-40  | -1.08163    | 0.454  | 0.698  | 2.64E-36  |
| Klf435    | 2.87E-35  | -1.09635    | 0.097  | 0.335  | 5.97E-31  |
| Ccn225    | 4.51E-25  | -1.10342    | 0.203  | 0.394  | 9.38E-21  |
| Col9a173  | 1.18E-73  | -1.11167    | 0.408  | 0.722  | 2.46E-69  |
| Zfp361178 | 7.33E-78  | -1.11336    | 0.517  | 0.851  | 1.52E-73  |
| Klf644    | 1.35E-44  | -1.15286    | 0.168  | 0.437  | 2.80E-40  |
| Ciart66   | 6.36E-66  | -1.21701    | 0.065  | 0.411  | 1.32E-61  |
| Mt1129    | 2.48E-129 | -1.2243     | 0.694  | 0.942  | 5.15E-125 |
| Nfkbiz66  | 4.74E-66  | -1.26943    | 0.178  | 0.506  | 9.86E-62  |
| Socs345   | 4.82E-45  | -1.27393    | 0.251  | 0.515  | 1.00E-40  |
| Jun116    | 1.02E-116 | -1.30709    | 0.567  | 0.897  | 2.12E-112 |
| Dbp133    | 1.71E-133 | -1.3505     | 0.433  | 0.838  | 3.55E-129 |
| Btg2119   | 3.42E-119 | -1.5354     | 0.54   | 0.858  | 7.12E-115 |
| Junb129   | 1.86E-129 | -1.54349    | 0.498  | 0.881  | 3.86E-125 |
| Egr1140   | 6.42E-140 | -1.55746    | 0.563  | 0.87   | 1.33E-135 |
| Fos147    | 7.54E-147 | -1.56699    | 0.573  | 0.897  | 1.57E-142 |
| Ier2147   | 1.04E-147 | -1.70768    | 0.502  | 0.869  | 2.17E-143 |
| Zfp36113  | 5.68E-113 | -1.74021    | 0.338  | 0.75   | 1.18E-108 |
| Fosb130   | 1.17E-130 | -1.83813    | 0.452  | 0.838  | 2.43E-126 |
| Ccn1132   | 2.68E-132 | -1.894      | 0.378  | 0.799  | 5.57E-128 |
| Dusp1146  | 3.33E-146 | -2.01071    | 0.373  | 0.806  | 6.92E-142 |

**Supplementary table 8c: IPA canonical pathway- comparison analysis for mouse Mueller Glia (pval < 0.05, top 50 based on z-score)**

| Canonical Pathways                                          | 12mo vs 3mo | 24mo vs 3mo |
|-------------------------------------------------------------|-------------|-------------|
| Visual phototransduction                                    | 4.243       | 4.264       |
| Nonsense-Mediated Decay (NMD)                               | 4.796       | 2.828       |
| Eukaryotic Translation Elongation                           | 4.796       | 2.828       |
| Eukaryotic Translation Termination                          | 4.796       | 2.828       |
| Eukaryotic Translation Initiation                           | 4.796       | 2.333       |
| Selenoamino acid metabolism                                 | 4.796       | 2.333       |
| SRP-dependent cotranslational protein targeting to membrane | 4.6         | 2.333       |

| Canonical Pathways                                            | 12mo vs 3mo | 24mo vs 3mo |
|---------------------------------------------------------------|-------------|-------------|
| Role of Tissue Factor in Cancer                               | -3          | -3.873      |
| Major pathway of rRNA processing in the nucleolus and cytosol | 4.491       | 2.333       |
| Pulmonary Fibrosis Idiopathic Signaling Pathway               | -2.84       | -3.545      |
| Response of EIF2AK4 (GCN2) to amino acid deficiency           | 4.796       | 1.508       |
| Coronavirus Pathogenesis Pathway                              | -2.714      | -3          |
| NGF-stimulated transcription                                  | -2.449      | -2.887      |
| Cell junction organization                                    | -2.236      | -3          |

| Canonical Pathways                                                        | 12mo vs 3mo | 24mo vs 3mo |
|---------------------------------------------------------------------------|-------------|-------------|
| EIF2 Signaling                                                            | 4.123       | 1           |
| Protein Kinase A Signaling                                                | 3.13        | 1.8         |
| O-linked glycosylation                                                    | -2          | -2.828      |
| NCAM signaling for neurite out-growth                                     | -2          | -2.714      |
| Wound Healing Signaling Pathway                                           | -1.633      | -3.051      |
| Signaling by TGF-beta Receptor Complex                                    | -1.342      | -3.162      |
| Neutrophil degranulation                                                  | 2.53        | -1.964      |
| Role of Hypercytokinemia/hyperchemokemia in the Pathogenesis of Influenza | 2.236       | 2.236       |
| Extracellular matrix organization                                         | -1.89       | -2.496      |
| Nuclear Cytoskeleton Signaling Pathway                                    | -2.236      | -2.111      |
| Molecular Mechanisms of Cancer                                            | 0.2         | -4.11       |
| RHO GTPase cycle                                                          | -1.265      | -2.982      |
| Oxidative Phosphorylation                                                 | 4.243       | N/A         |
| TP53 Regulates Metabolic Genes                                            | 2.236       | -2          |
| Amyloid fiber formation                                                   | 2.236       | -2          |
| G-Protein Coupled Receptor Signaling                                      | 2.858       | -1.372      |
| Integrin cell surface interactions                                        | -1.414      | -2.714      |
| STAT3 Pathway                                                             | -2.236      | -1.89       |

| Canonical Pathways                                                            | 12mo vs 3mo | 24mo vs 3mo |
|-------------------------------------------------------------------------------|-------------|-------------|
| SNARE Signaling Pathway                                                       | 2.646       | 1.414       |
| Sertoli Cell-Sertoli Cell Junction Signaling                                  | -1.89       | -2.138      |
| Pathogen Induced Cytokine Storm Signaling Pathway                             | -1          | -3          |
| Interferon alpha/beta signaling                                               | 2.714       | 1.265       |
| CREB Signaling in Neurons                                                     | -1.069      | -2.887      |
| Neutrophil Extracellular Trap Signaling Pathway                               | 3           | 0.905       |
| Signaling by VEGF                                                             | -1.342      | -2.53       |
| IL-15 Production                                                              | -1.342      | -2.53       |
| RAF/MAP kinase cascade                                                        | -0.707      | -3.153      |
| Interferon Signaling                                                          | 2.449       | 1.342       |
| Electron transport, ATP synthesis, and heat production by uncoupling proteins | 3.771       | N/A         |
| D-myo-inositol (3,4,5,6)-tetrakisphosphate Biosynthesis                       | -1.342      | -2.333      |
| D-myo-inositol-5-phosphate Metabolism                                         | -1.342      | -2.333      |
| 3-phosphoinositide Degradation                                                | -1.342      | -2.333      |
| 3-phosphoinositide Biosynthesis                                               | -1.342      | -2.333      |
| D-myo-inositol (1,4,5,6)-Tetrakisphosphate Biosynthesis                       | -1.342      | -2.333      |
| Superpathway of Inositol Phosphate Compounds                                  | -1.342      | -2.333      |

**Supplementary table 9a: DEG list for mouse Rod photoreceptors: 12-mo vs 3-mo (pvaladj < 0.01, |LFC| > 0.25, top 25 up and downregulated)**

| Genes     | pval      | avg_log2 FC | pct. 1 | pct. 2 | p.adj     |
|-----------|-----------|-------------|--------|--------|-----------|
| Hist3h2ba | 7.23E-228 | 1.008311    | 0.305  | 0.096  | 1.50E-223 |
| AY036118  | 0         | 0.98591     | 0.772  | 0.574  | 0         |
| Rnpc3     | 6.62E-149 | 0.95084     | 0.31   | 0.141  | 1.38E-144 |
| Peg3      | 4.24E-143 | 0.93747     | 0.328  | 0.16   | 8.82E-139 |
| Hist3h2a  | 1.79E-227 | 0.918432    | 0.388  | 0.159  | 3.71E-223 |
| Eif2s3y   | 5.55E-116 | 0.82353     | 0.123  | 0.023  | 1.15E-111 |
| Gria2     | 6.53E-73  | 0.778543    | 0.161  | 0.069  | 1.36E-68  |
| Pcp4l1    | 2.83E-127 | 0.731408    | 0.239  | 0.097  | 5.88E-123 |
| Ptpn      | 1.26E-78  | 0.710402    | 0.119  | 0.038  | 2.62E-74  |
| Gm16982   | 2.51E-50  | 0.677225    | 0.116  | 0.05   | 5.23E-46  |
| Glb1l3    | 5.17E-137 | 0.633093    | 0.163  | 0.038  | 1.08E-132 |
| Pitpnm3   | 5.71E-66  | 0.624353    | 0.314  | 0.204  | 1.19E-61  |
| Gm42418   | 6.53E-203 | 0.609506    | 1      | 1      | 1.36E-198 |
| Dnah7b    | 1.27E-63  | 0.597683    | 0.141  | 0.06   | 2.63E-59  |
| Frmppd2   | 7.14E-52  | 0.593189    | 0.189  | 0.106  | 1.49E-47  |
| Smug1     | 9.08E-60  | 0.591271    | 0.197  | 0.107  | 1.89E-55  |

| Genes   | pval      | avg_log2 FC | pct. 1 | pct. 2 | p.adj     |
|---------|-----------|-------------|--------|--------|-----------|
| Ahi1    | 3.01E-95  | 0.577239    | 0.485  | 0.336  | 6.26E-91  |
| Adgrv1  | 1.01E-49  | 0.561756    | 0.256  | 0.166  | 2.11E-45  |
| Meis2   | 1.35E-64  | 0.541322    | 0.327  | 0.214  | 2.82E-60  |
| Pfkip   | 3.09E-61  | 0.535691    | 0.355  | 0.243  | 6.42E-57  |
| Rpgrip1 | 1.27E-121 | 0.533983    | 0.779  | 0.628  | 2.64E-117 |
| Bcl2    | 2.94E-50  | 0.526728    | 0.11   | 0.046  | 6.11E-46  |
| Hdc     | 2.69E-56  | 0.522765    | 0.1    | 0.036  | 5.59E-52  |
| Gm11961 | 6.04E-59  | 0.52269     | 0.157  | 0.075  | 1.26E-54  |
| Mycbp2  | 3.31E-49  | 0.51727     | 0.298  | 0.203  | 6.88E-45  |
| Ubb     | 4.04E-96  | -0.36599    | 0.789  | 0.849  | 8.41E-92  |
| Lrrc2   | 6.60E-21  | -0.3664     | 0.08   | 0.12   | 1.37E-16  |
| Ip6k2   | 3.38E-21  | -0.37947    | 0.141  | 0.189  | 7.03E-17  |
| Tuba1b  | 1.76E-27  | -0.38288    | 0.372  | 0.429  | 3.66E-23  |
| Jun     | 5.37E-10  | -0.38879    | 0.125  | 0.152  | 1.12E-05  |
| Ptms    | 2.22E-20  | -0.3968     | 0.213  | 0.263  | 4.62E-16  |
| Vtn     | 4.23E-53  | -0.40737    | 0.601  | 0.65   | 8.79E-49  |

| Genes   | pval      | avg_log2 FC | pct. 1 | pct. 2 | p.adj     |
|---------|-----------|-------------|--------|--------|-----------|
| Gngt1   | 1.43E-142 | -0.4111     | 0.976  | 0.979  | 2.97E-138 |
| Ndufs2  | 2.02E-33  | -0.42018    | 0.438  | 0.489  | 4.20E-29  |
| Ssu72   | 2.14E-44  | -0.43343    | 0.436  | 0.505  | 4.44E-40  |
| Sncb    | 9.01E-32  | -0.4414     | 0.24   | 0.306  | 1.87E-27  |
| Phpt1   | 1.01E-42  | -0.45513    | 0.097  | 0.161  | 2.09E-38  |
| Glul    | 1.38E-20  | -0.47893    | 0.165  | 0.211  | 2.87E-16  |
| Bloc1s1 | 2.36E-47  | -0.48436    | 0.079  | 0.143  | 4.92E-43  |
| Gm11808 | 2.55E-36  | -0.49419    | 0.132  | 0.195  | 5.30E-32  |
| Ndufaf5 | 3.50E-57  | -0.50692    | 0.077  | 0.147  | 7.27E-53  |

| Genes | pval      | avg_log2 FC | pct. 1 | pct. 2 | p.adj     |
|-------|-----------|-------------|--------|--------|-----------|
| Rs1   | 2.87E-74  | -0.50962    | 0.659  | 0.701  | 5.96E-70  |
| Apoe  | 9.09E-13  | -0.52977    | 0.202  | 0.232  | 1.89E-08  |
| Rbm3  | 8.51E-52  | -0.56719    | 0.13   | 0.208  | 1.77E-47  |
| Gnb3  | 1.19E-29  | -0.56899    | 0.14   | 0.196  | 2.48E-25  |
| Sag   | 0         | -0.60358    | 0.981  | 0.992  | 0         |
| Eno1b | 4.27E-108 | -0.69842    | 0.105  | 0.216  | 8.88E-104 |
| Uba52 | 2.07E-114 | -0.82195    | 0.304  | 0.422  | 4.30E-110 |
| Tsix  | 0         | -2.18841    | 0.024  | 0.245  | 0         |
| Xist  | 0         | -2.90352    | 0.054  | 0.44   | 0         |

**Supplementary table 9b: DEG list for mouse Rod photoreceptors: 24-mo vs 3-mo (pvaladj < 0.01, |LFC| > 0.25, top 25 up and downregulated)**

| Genes         | pval      | avg_log2 FC | pct. 1 | pct. 2 | p.adj     |
|---------------|-----------|-------------|--------|--------|-----------|
| Gm42418       | 0         | 1.231456    | 1      | 1      | 0         |
| Eif2s3y       | 7.50E-214 | 1.052482    | 0.187  | 0.023  | 1.56E-209 |
| Bc1           | 4.01E-238 | 1.047307    | 0.559  | 0.299  | 8.33E-234 |
| Hist3h2a      | 0         | 1.033233    | 0.448  | 0.159  | 0         |
| Hist3h2ba     | 6.49E-255 | 0.985234    | 0.328  | 0.096  | 1.35E-250 |
| Csrp3         | 7.68E-171 | 0.899695    | 0.135  | 0.011  | 1.60E-166 |
| Gm11961       | 1.21E-168 | 0.897565    | 0.239  | 0.075  | 2.52E-164 |
| Pcp411        | 2.07E-173 | 0.887248    | 0.271  | 0.097  | 4.31E-169 |
| Glb113        | 1.15E-192 | 0.806981    | 0.2    | 0.038  | 2.39E-188 |
| Rnpc3         | 8.24E-151 | 0.806868    | 0.32   | 0.141  | 1.71E-146 |
| Hk2           | 0         | 0.773066    | 0.869  | 0.608  | 0         |
| Peg3          | 4.84E-133 | 0.740391    | 0.33   | 0.16   | 1.01E-128 |
| Ptpn          | 2.94E-113 | 0.727725    | 0.145  | 0.038  | 6.11E-109 |
| Negr1         | 5.22E-136 | 0.667225    | 0.386  | 0.204  | 1.09E-131 |
| Col4a3        | 1.10E-99  | 0.649641    | 0.146  | 0.043  | 2.29E-95  |
| Meis2         | 1.67E-108 | 0.616657    | 0.371  | 0.214  | 3.48E-104 |
| 3222401L13Rik | 5.75E-94  | 0.609178    | 0.288  | 0.153  | 1.20E-89  |
| Mrpl9         | 7.05E-61  | 0.603247    | 0.253  | 0.147  | 1.47E-56  |
| Ddx3y         | 3.03E-98  | 0.599452    | 0.105  | 0.019  | 6.31E-94  |
| Mef2c         | 1.29E-182 | 0.592919    | 0.722  | 0.507  | 2.68E-178 |
| Vax2os        | 2.54E-171 | 0.576385    | 0.719  | 0.894  | 5.28E-167 |
| Malat1        | 1.99E-244 | 0.574224    | 1      | 0.995  | 4.15E-240 |
| Osbp11a       | 1.39E-93  | 0.567056    | 0.182  | 0.07   | 2.88E-89  |

| Genes   | pval      | avg_log2 FC | pct. 1 | pct. 2 | p.adj     |
|---------|-----------|-------------|--------|--------|-----------|
| Nr2e3   | 1.47E-226 | 0.564402    | 0.85   | 0.649  | 3.05E-222 |
| Gria2   | 7.10E-58  | 0.560644    | 0.151  | 0.069  | 1.48E-53  |
| Clstn1  | 7.29E-35  | -0.51991    | 0.393  | 0.439  | 1.52E-30  |
| Arl3    | 1.82E-46  | -0.52037    | 0.502  | 0.544  | 3.79E-42  |
| mt-Nd2  | 4.06E-113 | -0.52173    | 0.852  | 0.873  | 8.45E-109 |
| Rps7    | 2.33E-71  | -0.52794    | 0.585  | 0.64   | 4.85E-67  |
| Rps24   | 1.13E-86  | -0.52843    | 0.648  | 0.709  | 2.35E-82  |
| Ndufaf5 | 1.98E-62  | -0.53451    | 0.071  | 0.147  | 4.12E-58  |
| Clu     | 1.35E-36  | -0.53478    | 0.053  | 0.102  | 2.80E-32  |
| Sag     | 0         | -0.54681    | 0.987  | 0.992  | 0         |
| Rpl13   | 7.43E-77  | -0.55498    | 0.613  | 0.669  | 1.55E-72  |
| mt-Cytb | 8.16E-157 | -0.55889    | 0.896  | 0.933  | 1.70E-152 |
| Rps10   | 2.64E-61  | -0.56203    | 0.518  | 0.572  | 5.50E-57  |
| Cox6c   | 1.24E-81  | -0.56849    | 0.577  | 0.637  | 2.59E-77  |
| Unc119  | 5.14E-274 | -0.60111    | 0.858  | 0.886  | 1.07E-269 |
| Ubb     | 2.39E-228 | -0.62961    | 0.788  | 0.849  | 4.97E-224 |
| Gngt1   | 3.41E-269 | -0.6339     | 0.975  | 0.979  | 7.10E-265 |
| Gnb3    | 7.10E-36  | -0.64766    | 0.132  | 0.196  | 1.48E-31  |
| Gm47283 | 5.92E-39  | -0.64819    | 0.18   | 0.255  | 1.23E-34  |
| Selenow | 3.50E-59  | -0.69884    | 0.301  | 0.386  | 7.27E-55  |
| Rbm3    | 1.80E-100 | -0.75551    | 0.097  | 0.208  | 3.74E-96  |
| Dbi     | 1.88E-68  | -0.77058    | 0.095  | 0.182  | 3.92E-64  |
| Gnas    | 8.03E-133 | -0.81939    | 0.093  | 0.222  | 1.67E-128 |



| Genes | pval     | avg_log<br>2FC | pct.<br>1 | pct.<br>2 | p.adj    |
|-------|----------|----------------|-----------|-----------|----------|
| Glul  | 8.52E-96 | -0.90569       | 0.104     | 0.211     | 1.77E-91 |
| ApoE  | 2.00E-85 | -1.00786       | 0.129     | 0.232     | 4.16E-81 |

| Genes | pval | avg_log<br>2FC | pct.<br>1 | pct.<br>2 | p.adj |
|-------|------|----------------|-----------|-----------|-------|
| Tsix  | 0    | -2.54824       | 0         | 0.245     | 0     |
| Xist  | 0    | -4.14564       | 0         | 0.44      | 0     |

**Supplementary table 9c: IPA canonical pathway- comparison analysis for mouse Rod photoreceptors (pval < 0.05, top 50 based on z-score)**

| Canonical Pathways                                                            | 12mo<br>vs<br>3mo | 24mo<br>vs<br>3mo |
|-------------------------------------------------------------------------------|-------------------|-------------------|
| Eukaryotic Translation Elongation                                             | -4.583            | -7.874            |
| Eukaryotic Translation Initiation                                             | -4.583            | -7.746            |
| SRP-dependent cotranslational protein targeting to membrane                   | -4.583            | -7.746            |
| Response of EIF2AK4 (GCN2) to amino acid deficiency                           | -4.583            | -7.681            |
| Selenoamino acid metabolism                                                   | -4.583            | -7.681            |
| Eukaryotic Translation Termination                                            | -4.583            | -7.681            |
| Nonsense-Mediated Decay (NMD)                                                 | -4.583            | -7.488            |
| Major pathway of rRNA processing in the nucleolus and cytosol                 | -3.962            | -7.298            |
| EIF2 Signaling                                                                | -2.714            | -5.333            |
| Coronavirus Pathogenesis Pathway                                              | 2.673             | 4.747             |
| Parkinson's Signaling Pathway                                                 | 2.828             | 3.441             |
| Processing of Capped Intron-Containing Pre-mRNA                               | 2                 | 2.496             |
| RUNX1 regulates megakaryocyte differentiation and platelet function           | 2                 | 2.236             |
| RHO GTPase cycle                                                              | 1.897             | 2.111             |
| Neutrophil degranulation                                                      | 1                 | -2.982            |
| MicroRNA Biogenesis Signaling Pathway                                         | 2                 | 1.89              |
| Synaptic Long Term Depression                                                 | 1.89              | 1.89              |
| Oxytocin in Brain Signaling Pathway                                           | 1.89              | 1.633             |
| Electron transport, ATP synthesis, and heat production by uncoupling proteins | N/A               | -3.464            |
| Oxidative Phosphorylation                                                     | N/A               | -3.464            |
| Beta-catenin independent WNT signaling                                        | -1.633            | -1.667            |
| Ion channel transport                                                         | 2.236             | -0.816            |
| MAPK6/MAPK4 signaling                                                         | -1                | -2                |
| Endocannabinoid Neuronal Synapse Pathway                                      | 1.633             | 1.134             |

| Canonical Pathways                                                  | 12mo<br>vs<br>3mo | 24mo<br>vs<br>3mo |
|---------------------------------------------------------------------|-------------------|-------------------|
| Cellular Effects of Sildenafil (Viagra)                             | -1.155            | -1.5              |
| TP53 Regulates Metabolic Genes                                      | N/A               | -2.646            |
| Mitochondrial Dysfunction                                           | -0.447            | 2.065             |
| Protein folding                                                     | -1.342            | -1                |
| Vasopressin regulates renal water homeostasis via Aquaporins        | -1                | -1.342            |
| GPER1 signaling                                                     | -1                | -1.342            |
| G alpha (z) signalling events                                       | -1                | -1.342            |
| Phototransduction Pathway                                           | -1.134            | -1.134            |
| Dopamine-DARPP32 Feedback in cAMP Signaling                         | N/A               | -2.236            |
| Amyloid fiber formation                                             | N/A               | -2.236            |
| Orexin Signaling Pathway                                            | 0.816             | -1.414            |
| Gap Junction Signaling                                              | -1.414            | -0.816            |
| Visual phototransduction                                            | -1.414            | -0.707            |
| Granzyme A Signaling                                                | N/A               | 2.121             |
| ERK5 Signaling                                                      | N/A               | 2                 |
| Transport of inorganic cations/anions and amino acids/oligopeptides | 2                 | N/A               |
| NR1H2 and NR1H3-mediated signaling                                  | N/A               | -2                |
| Formation of WDR5-containing histone-modifying complexes            | N/A               | 2                 |
| Platelet homeostasis                                                | -1                | -1                |
| Class B/2 (Secretin family receptors)                               | -1                | -1                |
| Mitophagy                                                           | N/A               | -2                |
| L1CAM interactions                                                  | 0                 | 2                 |
| Extra-nuclear estrogen signaling                                    | 0.816             | 1.134             |
| Clathrin-mediated endocytosis                                       | 1.134             | 0.816             |
| Hematoma Resolution Signaling Pathway                               | N/A               | -1.941            |

**Supplementary table 10a: DEG list for mouse Cone photoreceptors: 12-mo vs 3-mo (pvaladj < 0.01, |LFC| > 0.25, top 25 up and downregulated)**

| Genes  | pval      | avg_log2<br>FC | pct.<br>1 | pct.<br>2 | p.adj     |
|--------|-----------|----------------|-----------|-----------|-----------|
| Hbb-bs | 1.36E-10  | 1.58721        | 0.134     | 0.07      | 2.82E-06  |
| Pcp411 | 3.55E-178 | 1.292649       | 0.545     | 0.104     | 7.39E-174 |
| Pcp2   | 4.93E-30  | 0.906482       | 0.249     | 0.102     | 1.03E-25  |
| Drd4   | 1.29E-111 | 0.86543        | 0.635     | 0.283     | 2.67E-107 |
| Gng13  | 3.42E-43  | 0.743891       | 0.387     | 0.176     | 7.10E-39  |
| Fabp7  | 5.02E-72  | 0.645879       | 0.451     | 0.165     | 1.04E-67  |
| Ttyh1  | 1.18E-63  | 0.609185       | 0.739     | 0.482     | 2.46E-59  |

| Genes    | pval      | avg_log2<br>FC | pct.<br>1 | pct.<br>2 | p.adj     |
|----------|-----------|----------------|-----------|-----------|-----------|
| Car2     | 6.10E-65  | 0.58998        | 0.83      | 0.633     | 1.27E-60  |
| mt-Co1   | 1.94E-115 | 0.567281       | 0.998     | 0.996     | 4.04E-111 |
| Mef2c    | 2.50E-51  | 0.564951       | 0.509     | 0.268     | 5.19E-47  |
| Plekhhb1 | 3.92E-76  | 0.546717       | 0.879     | 0.801     | 8.16E-72  |
| Trnp1    | 6.20E-23  | 0.488225       | 0.156     | 0.054     | 1.29E-18  |
| Gnat1    | 1.66E-75  | 0.477889       | 0.702     | 0.363     | 3.45E-71  |
| Atp2b1   | 1.17E-48  | 0.467507       | 0.87      | 0.753     | 2.44E-44  |

| Genes   | pval     | avg_log2 FC | pct. 1 | pct. 2 | p.adj    |
|---------|----------|-------------|--------|--------|----------|
| Ptpm    | 7.26E-33 | 0.449647    | 0.477  | 0.277  | 1.51E-28 |
| mt-Nd3  | 4.63E-50 | 0.449178    | 0.985  | 0.976  | 9.62E-46 |
| Pcp4    | 3.28E-17 | 0.446877    | 0.167  | 0.075  | 6.83E-13 |
| Mogat1  | 5.81E-42 | 0.432616    | 0.357  | 0.157  | 1.21E-37 |
| Nr2e3   | 8.82E-18 | 0.412557    | 0.227  | 0.119  | 1.83E-13 |
| Rnpc3   | 7.55E-18 | 0.386607    | 0.644  | 0.475  | 1.57E-13 |
| Rpl35   | 9.17E-33 | 0.385839    | 0.635  | 0.417  | 1.91E-28 |
| Revrm   | 2.90E-55 | 0.378124    | 0.922  | 0.929  | 6.02E-51 |
| Gnb1    | 9.82E-43 | 0.376432    | 0.619  | 0.366  | 2.04E-38 |
| Rpl38   | 1.38E-37 | 0.372838    | 0.861  | 0.731  | 2.87E-33 |
| Actg1   | 1.68E-31 | 0.365001    | 0.801  | 0.622  | 3.48E-27 |
| Jchain  | 5.24E-15 | -0.42046    | 0.3    | 0.371  | 1.09E-10 |
| Rbp3    | 1.56E-63 | -0.4268     | 0.932  | 0.945  | 3.24E-59 |
| Grk1    | 6.98E-28 | -0.43958    | 0.654  | 0.685  | 1.45E-23 |
| Usp2    | 1.40E-17 | -0.44713    | 0.417  | 0.488  | 2.90E-13 |
| Galnt13 | 1.47E-11 | -0.44995    | 0.364  | 0.408  | 3.05E-07 |
| Slc24a2 | 5.81E-30 | -0.47476    | 0.571  | 0.629  | 1.21E-25 |
| Bcl1    | 2.47E-21 | -0.48014    | 0.205  | 0.313  | 5.14E-17 |

| Genes   | pval      | avg_log2 FC | pct. 1 | pct. 2 | p.adj     |
|---------|-----------|-------------|--------|--------|-----------|
| Kcne2   | 9.86E-32  | -0.48988    | 0.669  | 0.742  | 2.05E-27  |
| Thrb    | 1.21E-18  | -0.49016    | 0.628  | 0.649  | 2.51E-14  |
| Eno1b   | 1.01E-27  | -0.51691    | 0.173  | 0.286  | 2.10E-23  |
| Rtbdn   | 1.80E-84  | -0.54809    | 0.895  | 0.936  | 3.74E-80  |
| Pdc     | 2.58E-100 | -0.55283    | 0.942  | 0.949  | 5.36E-96  |
| Rbm3    | 1.72E-29  | -0.56913    | 0.458  | 0.546  | 3.58E-25  |
| Olfm1   | 2.04E-55  | -0.57163    | 0.729  | 0.807  | 4.24E-51  |
| Uba52   | 2.51E-27  | -0.57627    | 0.414  | 0.491  | 5.22E-23  |
| Sag     | 1.40E-155 | -0.57824    | 0.977  | 0.969  | 2.91E-151 |
| Ip6k2   | 1.07E-31  | -0.59683    | 0.417  | 0.507  | 2.23E-27  |
| Stxbp1  | 1.23E-78  | -0.63591    | 0.815  | 0.848  | 2.56E-74  |
| Pcdh15  | 9.26E-73  | -0.6602     | 0.83   | 0.852  | 1.93E-68  |
| Adcy1   | 8.74E-61  | -0.67589    | 0.152  | 0.331  | 1.82E-56  |
| Dbp     | 4.01E-42  | -0.7144     | 0.305  | 0.453  | 8.33E-38  |
| mt-Atp8 | 2.54E-94  | -0.76141    | 0.71   | 0.843  | 5.28E-90  |
| Hopx    | 2.04E-53  | -0.78315    | 0.46   | 0.581  | 4.23E-49  |
| Arr3    | 2.05E-158 | -0.78752    | 0.954  | 0.962  | 4.27E-154 |
| Rs1     | 1.05E-156 | -1.02809    | 0.741  | 0.851  | 2.19E-152 |

Supplementary table 10b: DEG list for mouse Cone photoreceptors: 24-mo vs 3-mo (pvaladj < 0.01, |LFC| > 0.25, top 25 up and downregulated)

| Genes   | pval      | avg_log2 FC | pct. 1 | pct. 2 | p.adj    |
|---------|-----------|-------------|--------|--------|----------|
| Gnat1   | 1.95E-73  | 1.559029    | 0.862  | 0.363  | 4.05E-69 |
| Gnb1    | 3.52E-64  | 1.53724     | 0.82   | 0.366  | 7.32E-60 |
| Pcp4l1  | 1.15E-100 | 1.530277    | 0.587  | 0.104  | 2.39E-96 |
| Rho     | 2.39E-87  | 1.473289    | 0.995  | 0.631  | 4.97E-83 |
| Pde6b   | 1.92E-76  | 1.422331    | 0.677  | 0.195  | 3.99E-72 |
| Nr2e3   | 1.22E-55  | 1.415527    | 0.466  | 0.119  | 2.53E-51 |
| Bcl1    | 2.50E-25  | 1.340245    | 0.598  | 0.313  | 5.20E-21 |
| Cngb1   | 8.90E-48  | 1.338385    | 0.497  | 0.155  | 1.85E-43 |
| Vax2os  | 4.38E-49  | 1.315846    | 0.458  | 0.131  | 9.12E-45 |
| Pde6a   | 1.51E-45  | 1.299579    | 0.63   | 0.27   | 3.13E-41 |
| Drd4    | 5.42E-69  | 1.285285    | 0.712  | 0.283  | 1.13E-64 |
| Cnga1   | 3.88E-41  | 1.198752    | 0.526  | 0.188  | 8.07E-37 |
| Slc24a1 | 7.73E-41  | 1.198642    | 0.566  | 0.222  | 1.61E-36 |
| Nrl     | 4.35E-39  | 1.13597     | 0.495  | 0.174  | 9.04E-35 |

| Genes       | pval     | avg_log2 FC | pct. 1 | pct. 2 | p.adj    |
|-------------|----------|-------------|--------|--------|----------|
| Mef2c       | 2.76E-42 | 1.007437    | 0.614  | 0.268  | 5.74E-38 |
| Gm42418     | 3.15E-99 | 0.936013    | 1      | 1      | 6.55E-95 |
| Samd11      | 1.57E-32 | 0.905792    | 0.426  | 0.148  | 3.26E-28 |
| Rpl         | 6.77E-38 | 0.79224     | 0.931  | 0.805  | 1.41E-33 |
| AC14909.0.1 | 5.63E-21 | 0.783164    | 0.548  | 0.282  | 1.17E-16 |
| Reep6       | 1.40E-23 | 0.763121    | 0.471  | 0.213  | 2.92E-19 |
| mt-Nd3      | 3.52E-25 | 0.757601    | 0.987  | 0.976  | 7.32E-21 |
| Rom1        | 6.14E-39 | 0.756774    | 0.963  | 0.89   | 1.28E-34 |
| Agpat3      | 3.00E-27 | 0.727832    | 0.817  | 0.622  | 6.24E-23 |
| Ybx3        | 1.55E-18 | 0.684229    | 0.651  | 0.406  | 3.23E-14 |
| Lynx1       | 2.72E-07 | -0.62214    | 0.272  | 0.367  | 0.005653 |
| Jchain      | 3.59E-12 | -0.62467    | 0.209  | 0.371  | 7.46E-08 |
| Adcy1       | 1.96E-12 | -0.62865    | 0.167  | 0.331  | 4.08E-08 |
| Rs1         | 1.22E-20 | -0.63563    | 0.786  | 0.851  | 2.53E-16 |

| Genes    | pval     | avg_log2 FC | pct. 1 | pct. 2 | p.adj    |
|----------|----------|-------------|--------|--------|----------|
| Olfm1    | 2.17E-20 | -0.64291    | 0.701  | 0.807  | 4.52E-16 |
| Dusp1    | 1.87E-08 | -0.68157    | 0.032  | 0.13   | 0.000389 |
| Ppia     | 4.52E-21 | -0.70301    | 0.701  | 0.819  | 9.40E-17 |
| Casp7    | 3.50E-13 | -0.70849    | 0.288  | 0.447  | 7.28E-09 |
| AY036118 | 1.55E-13 | -0.71415    | 0.783  | 0.845  | 3.22E-09 |
| Sag      | 8.74E-63 | -0.72595    | 0.976  | 0.969  | 1.82E-58 |
| Fos      | 9.31E-12 | -0.74543    | 0.571  | 0.679  | 1.94E-07 |
| Hopx     | 8.58E-15 | -0.75953    | 0.444  | 0.581  | 1.78E-10 |
| Rlbp1    | 1.72E-07 | -0.85857    | 0.061  | 0.162  | 0.003576 |
| Stxbp1   | 1.66E-37 | -0.86015    | 0.754  | 0.848  | 3.46E-33 |
| Rbm3     | 2.59E-23 | -0.88878    | 0.323  | 0.546  | 5.39E-19 |

| Genes  | pval     | avg_log2 FC | pct. 1 | pct. 2 | p.adj    |
|--------|----------|-------------|--------|--------|----------|
| Pcdh15 | 2.15E-39 | -0.91856    | 0.743  | 0.852  | 4.46E-35 |
| Jun    | 2.58E-11 | -0.97686    | 0.257  | 0.401  | 5.37E-07 |
| Glul   | 7.38E-16 | -0.99077    | 0.198  | 0.401  | 1.53E-11 |
| Fosb   | 5.22E-13 | -0.99684    | 0.156  | 0.323  | 1.08E-08 |
| Dbp    | 3.24E-23 | -1.01068    | 0.206  | 0.453  | 6.74E-19 |
| Dkk3   | 1.06E-09 | -1.03417    | 0.016  | 0.121  | 2.19E-05 |
| Arr3   | 1.78E-97 | -1.41083    | 0.884  | 0.962  | 3.69E-93 |
| Mt1    | 4.57E-09 | -1.60866    | 0.063  | 0.18   | 9.50E-05 |
| Xist   | 3.21E-14 | -1.98391    | 0      | 0.137  | 6.67E-10 |
| Apoe   | 1.24E-30 | -2.55098    | 0.225  | 0.518  | 2.58E-26 |

**Supplementary table 10c: IPA canonical pathway- comparison analysis for mouse Cone photoreceptors (pval < 0.05, top 50 based on z-score)**

| Canonical Pathways                                         | 12mo vs 3mo | 24mo vs 3mo |
|------------------------------------------------------------|-------------|-------------|
| G Beta Gamma Signaling                                     | 2.236       | 1           |
| Phototransduction Pathway                                  | 2.673       | 0.471       |
| Nonsense-Mediated Decay (NMD)                              | 1           | 2           |
| SNARE Signaling Pathway                                    | -1.633      | -1.134      |
| Gap Junction Signaling                                     | -1.89       | -0.816      |
| Cilium Assembly                                            | N/A         | 2.646       |
| Platelet homeostasis                                       | 1.342       | 1           |
| Coronavirus Pathogenesis Pathway                           | N/A         | -2.236      |
| Protein Kinase A Signaling                                 | 0.333       | 1.807       |
| Beta-catenin independent WNT signaling                     | 1           | 1.134       |
| Oxytocin in Brain Signaling Pathway                        | 2           | N/A         |
| Role of PKR in Interferon Induction and Antiviral Response | N/A         | -2          |
| Chemokine Signaling                                        | N/A         | -2          |
| G-Protein Coupled Receptor Signaling                       | 1.155       | -0.816      |
| Visual phototransduction                                   | -0.832      | 1           |
| Endothelin-1 Signaling                                     | 0.816       | -1          |
| Estrogen Receptor Signaling                                | 1           | -0.816      |
| Molecular Mechanisms of Cancer                             | 1.265       | -0.535      |
| GNRH Signaling                                             | 0           | -1.633      |
| Acetylcholine Receptor Signaling Pathway                   | -0.447      | -1          |
| Eukaryotic Translation Initiation                          | 0.447       | 1           |
| Synaptogenesis Signaling Pathway                           | -1.134      | -0.302      |
| tRNA Splicing                                              | N/A         | 1.414       |
| BBSome Signaling Pathway                                   | N/A         | 1.414       |

| Canonical Pathways                       | 12mo vs 3mo | 24mo vs 3mo |
|------------------------------------------|-------------|-------------|
| CLEAR Signaling Pathway                  | 1.342       | N/A         |
| Insulin Secretion Signaling Pathway      | -1.342      | N/A         |
| S100 Family Signaling Pathway            | 0.707       | -0.632      |
| Docosahexaenoic Acid (DHA) Signaling     | 0.816       | 0.447       |
| G alpha (s) signalling events            | 0.447       | 0.816       |
| Opioid Signaling Pathway                 | 1.134       | 0           |
| Eicosanoid Signaling                     | 1           | N/A         |
| Opioid Signalling                        | 0           | -1          |
| Colorectal Cancer Metastasis Signaling   | N/A         | -1          |
| IL-8 Signaling                           | N/A         | -1          |
| Cardiac $\beta$ -adrenergic Signaling    | N/A         | 1           |
| EIF2 Signaling                           | 1           | N/A         |
| Gai Signaling                            | N/A         | 1           |
| cAMP-mediated signaling                  | -0.447      | 0.535       |
| Role of NFAT in Cardiac Hypertrophy      | 0.447       | 0.447       |
| Ion channel transport                    | 0.447       | 0.447       |
| Cachexia Signaling Pathway               | -0.378      | -0.447      |
| Oxytocin Signaling Pathway               | 0.378       | 0.447       |
| PPAR $\alpha$ /RXR $\alpha$ Activation   | N/A         | 0.816       |
| Cellular Effects of Sildenafil (Viagra)  | 0           | -0.728      |
| G alpha (i) signalling events            | 0.632       | 0           |
| RAR Activation                           | -0.333      | -0.218      |
| Cardiac Hypertrophy Signaling (Enhanced) | 0           | 0.535       |
| ESR-mediated signaling                   | N/A         | -0.447      |

**Supplementary table 11a: DEG list for mouse Bipolar cells: 12-mo vs 3-mo (pvaladj < 0.01, |LFC| > 0.25, top 25 up and downregulated)**

| Genes         | pval      | avg_log2FC | pct. 1 | pct. 2 | p.adj     |
|---------------|-----------|------------|--------|--------|-----------|
| Meis2         | 6.61E-33  | 0.733195   | 0.182  | 0.075  | 1.37E-28  |
| Aldoc         | 3.62E-56  | 0.586585   | 0.429  | 0.235  | 7.53E-52  |
| Gnat1         | 7.43E-109 | 0.56547    | 0.663  | 0.351  | 1.54E-104 |
| Gsg1          | 3.80E-15  | 0.557783   | 0.228  | 0.15   | 7.91E-11  |
| Eno1          | 3.63E-67  | 0.538835   | 0.701  | 0.507  | 7.55E-63  |
| Rpl35         | 6.63E-68  | 0.501545   | 0.615  | 0.393  | 1.38E-63  |
| Rbp3          | 2.45E-55  | 0.494466   | 0.451  | 0.242  | 5.10E-51  |
| Rpl6          | 5.41E-72  | 0.491389   | 0.807  | 0.726  | 1.12E-67  |
| Revrm         | 4.07E-38  | 0.487394   | 0.372  | 0.21   | 8.45E-34  |
| AC149090.1    | 4.70E-72  | 0.486066   | 0.85   | 0.675  | 9.77E-68  |
| Rho           | 8.41E-166 | 0.477082   | 0.89   | 0.615  | 1.75E-161 |
| Ptprz1        | 6.11E-32  | 0.473951   | 0.42   | 0.273  | 1.27E-27  |
| Cplx4         | 8.90E-27  | 0.469283   | 0.317  | 0.197  | 1.85E-22  |
| Gm30382       | 8.86E-37  | 0.462643   | 0.405  | 0.249  | 1.84E-32  |
| Rpl38         | 1.57E-63  | 0.456661   | 0.795  | 0.69   | 3.26E-59  |
| Rps29         | 3.34E-67  | 0.453315   | 0.858  | 0.822  | 6.95E-63  |
| 3222401L13Rik | 3.48E-49  | 0.447053   | 0.364  | 0.184  | 7.23E-45  |
| Cntn5         | 2.29E-21  | 0.44211    | 0.111  | 0.043  | 4.77E-17  |
| Gnb1          | 2.03E-65  | 0.418367   | 0.576  | 0.335  | 4.22E-61  |
| Nfia          | 2.72E-13  | 0.410982   | 0.139  | 0.079  | 5.67E-09  |
| Rpl37         | 6.84E-53  | 0.400063   | 0.81   | 0.728  | 1.42E-48  |
| Rpl10         | 1.84E-42  | 0.398636   | 0.591  | 0.409  | 3.83E-38  |
| Hk2           | 1.31E-30  | 0.397267   | 0.195  | 0.088  | 2.72E-26  |
| Nr2e3         | 1.65E-30  | 0.393723   | 0.183  | 0.078  | 3.42E-26  |
| mt-Nd5        | 4.86E-77  | -0.36036   | 0.909  | 0.972  | 1.01E-72  |

| Genes   | pval      | avg_log2FC | pct. 1 | pct. 2 | p.adj     |
|---------|-----------|------------|--------|--------|-----------|
| Zfp365  | 1.58E-16  | -0.36096   | 0.503  | 0.541  | 3.29E-12  |
| Adrb1   | 1.05E-14  | -0.36155   | 0.39   | 0.444  | 2.18E-10  |
| Argl1   | 1.09E-40  | -0.36322   | 0.776  | 0.813  | 2.26E-36  |
| Gprasp1 | 2.18E-16  | -0.36503   | 0.46   | 0.505  | 4.54E-12  |
| Ndnf    | 8.05E-21  | -0.36517   | 0.646  | 0.678  | 1.67E-16  |
| Lrtm1   | 3.80E-42  | -0.37059   | 0.835  | 0.859  | 7.90E-38  |
| Dnaja1  | 2.13E-25  | -0.3739    | 0.709  | 0.748  | 4.44E-21  |
| Ppm1e   | 5.22E-23  | -0.38179   | 0.396  | 0.465  | 1.08E-18  |
| Slc24a4 | 3.90E-18  | -0.39235   | 0.322  | 0.387  | 8.10E-14  |
| Spc25   | 9.88E-15  | -0.39925   | 0.065  | 0.113  | 2.05E-10  |
| Prdm8   | 5.72E-19  | -0.42474   | 0.386  | 0.446  | 1.19E-14  |
| Gnao1   | 3.12E-46  | -0.43325   | 0.791  | 0.815  | 6.48E-42  |
| Glul    | 6.17E-13  | -0.45021   | 0.406  | 0.446  | 1.28E-08  |
| Uba52   | 1.04E-20  | -0.45932   | 0.418  | 0.466  | 2.16E-16  |
| Mt1     | 4.84E-32  | -0.47961   | 0.539  | 0.62   | 1.01E-27  |
| Vstm2b  | 1.82E-31  | -0.48371   | 0.464  | 0.557  | 3.78E-27  |
| Map4    | 7.24E-87  | -0.51938   | 0.838  | 0.881  | 1.51E-82  |
| Strip2  | 6.12E-36  | -0.54877   | 0.425  | 0.521  | 1.27E-31  |
| Car8    | 5.39E-35  | -0.55108   | 0.485  | 0.572  | 1.12E-30  |
| Gm42418 | 6.20E-79  | -0.58823   | 1      | 1      | 1.29E-74  |
| Adcy1   | 1.64E-144 | -0.70287   | 0.056  | 0.243  | 3.41E-140 |
| Prkca   | 3.56E-69  | -0.80975   | 0.503  | 0.602  | 7.40E-65  |
| Bcl1    | 1.40E-83  | -0.9728    | 0.404  | 0.581  | 2.91E-79  |
| mt-Atp8 | 4.51E-272 | -1.20737   | 0.583  | 0.838  | 9.38E-268 |

**Supplementary table 11b: DEG list for mouse Bipolar cells: 24-mo vs 3-mo (pvaladj < 0.01, |LFC| > 0.25, top 25 up and downregulated)**

| Genes | pval      | avg_log2FC | pct. 1 | pct. 2 | p.adj     |
|-------|-----------|------------|--------|--------|-----------|
| Rpl   | 1.09E-136 | 1.769517   | 0.7    | 0.183  | 2.27E-132 |
| Pdc   | 1.15E-93  | 1.559296   | 0.806  | 0.352  | 2.40E-89  |
| Rho   | 9.57E-141 | 1.529795   | 0.986  | 0.615  | 1.99E-136 |
| Gnb1  | 9.06E-88  | 1.486724   | 0.783  | 0.335  | 1.88E-83  |
| Bcl1  | 1.54E-41  | 1.46184    | 0.804  | 0.581  | 3.21E-37  |
| Gnat1 | 2.32E-101 | 1.444294   | 0.836  | 0.351  | 4.82E-97  |

| Genes | pval      | avg_log2FC | pct. 1 | pct. 2 | p.adj    |
|-------|-----------|------------|--------|--------|----------|
| Rcvrn | 2.70E-79  | 1.412348   | 0.621  | 0.21   | 5.61E-75 |
| Pde6a | 1.73E-86  | 1.392042   | 0.529  | 0.146  | 3.60E-82 |
| Nr2e3 | 1.58E-99  | 1.380485   | 0.434  | 0.078  | 3.29E-95 |
| Pde6b | 2.73E-103 | 1.345706   | 0.58   | 0.144  | 5.67E-99 |
| Cnga1 | 1.11E-75  | 1.303512   | 0.492  | 0.137  | 2.30E-71 |
| Pde6g | 6.06E-87  | 1.302449   | 0.781  | 0.317  | 1.26E-82 |

| Genes       | pval     | avg_log2 FC | pct. 1 | pct. 2 | p.adj    |
|-------------|----------|-------------|--------|--------|----------|
| Hk2         | 3.97E-86 | 1.297743    | 0.423  | 0.088  | 8.25E-82 |
| Slc24a1     | 9.74E-69 | 1.201609    | 0.547  | 0.18   | 2.02E-64 |
| Cplx4       | 2.31E-44 | 1.041561    | 0.476  | 0.197  | 4.80E-40 |
| Samd11      | 1.17E-69 | 1.040138    | 0.312  | 0.056  | 2.42E-65 |
| Rpgrip1     | 1.72E-65 | 1.017759    | 0.653  | 0.264  | 3.58E-61 |
| Guca1a      | 5.39E-76 | 1.004415    | 0.656  | 0.234  | 1.12E-71 |
| Grk1        | 4.39E-75 | 1.003693    | 0.363  | 0.07   | 9.13E-71 |
| Prph2       | 1.67E-42 | 0.995483    | 0.808  | 0.517  | 3.47E-38 |
| Sag         | 3.81E-59 | 0.994643    | 0.799  | 0.446  | 7.92E-55 |
| Gngt1       | 4.57E-55 | 0.973749    | 0.884  | 0.544  | 9.50E-51 |
| Tulp1       | 3.22E-48 | 0.950809    | 0.605  | 0.27   | 6.69E-44 |
| AC14909.0.1 | 4.86E-61 | 0.904003    | 0.898  | 0.675  | 1.01E-56 |
| Rom1        | 2.61E-39 | 0.890159    | 0.871  | 0.649  | 5.42E-35 |
| Mt2         | 6.92E-08 | -0.55561    | 0.21   | 0.296  | 0.00144  |
| Rgs7        | 1.70E-09 | -0.5562     | 0.332  | 0.416  | 3.54E-05 |
| Adrb1       | 8.40E-10 | -0.56469    | 0.344  | 0.444  | 1.75E-05 |
| Rgs16       | 1.04E-08 | -0.58117    | 0.351  | 0.416  | 0.000216 |
| Spc25       | 7.58E-11 | -0.58432    | 0.025  | 0.113  | 1.58E-06 |
| Ppm1e       | 2.00E-13 | -0.59105    | 0.356  | 0.465  | 4.15E-09 |

| Genes     | pval     | avg_log2 FC | pct. 1 | pct. 2 | p.adj    |
|-----------|----------|-------------|--------|--------|----------|
| Junb      | 5.56E-10 | -0.60546    | 0.192  | 0.307  | 1.16E-05 |
| Itm2c     | 3.72E-17 | -0.6251     | 0.489  | 0.605  | 7.74E-13 |
| Rbm3      | 4.90E-13 | -0.62798    | 0.245  | 0.368  | 1.02E-08 |
| Strip2    | 2.48E-13 | -0.68211    | 0.42   | 0.521  | 5.16E-09 |
| Prkca     | 5.43E-16 | -0.68363    | 0.481  | 0.602  | 1.13E-11 |
| Dusp1     | 1.47E-14 | -0.68566    | 0.06   | 0.186  | 3.06E-10 |
| Tsix      | 2.40E-15 | -0.77307    | 0.004  | 0.108  | 4.99E-11 |
| Jun       | 2.23E-11 | -0.80163    | 0.189  | 0.304  | 4.63E-07 |
| Vstm2b    | 1.02E-19 | -0.81024    | 0.427  | 0.557  | 2.11E-15 |
| Cacna2d3  | 8.74E-23 | -0.84248    | 0.54   | 0.66   | 1.82E-18 |
| Glul      | 3.18E-22 | -0.88246    | 0.261  | 0.446  | 6.62E-18 |
| Car8      | 1.20E-23 | -0.95344    | 0.43   | 0.572  | 2.50E-19 |
| Mt1       | 1.21E-29 | -1.04766    | 0.444  | 0.62   | 2.51E-25 |
| Arr3      | 1.52E-19 | -1.10711    | 0.041  | 0.195  | 3.15E-15 |
| Fosb      | 3.78E-18 | -1.17015    | 0.09   | 0.253  | 7.87E-14 |
| AY03611.8 | 9.95E-38 | -1.21705    | 0.721  | 0.833  | 2.07E-33 |
| Fos       | 8.35E-39 | -1.23563    | 0.252  | 0.529  | 1.74E-34 |
| Apoe      | 2.92E-45 | -1.37216    | 0.136  | 0.443  | 6.08E-41 |
| Xist      | 7.16E-21 | -2.89061    | 0.002  | 0.142  | 1.49E-16 |

Supplementary table 11c: IPA canonical pathway- comparison analysis for mouse Bipolar cells (pval < 0.05, top 50 based on z-score)

| Canonical Pathways                                            | 12mo vs 3mo | 24mo vs 3mo |
|---------------------------------------------------------------|-------------|-------------|
| Visual phototransduction                                      | 2.53        | 4.379       |
| Nonsense-Mediated Decay (NMD)                                 | 3.742       | 3           |
| Major pathway of rRNA processing in the nucleolus and cytosol | 3.742       | 2.828       |
| Selenoamino acid metabolism                                   | 3.742       | 2.828       |
| Eukaryotic Translation Elongation                             | 3.742       | 2.828       |
| Eukaryotic Translation Initiation                             | 3.742       | 2.828       |
| SRP-dependent cotranslational protein targeting to membrane   | 3.742       | 2.828       |
| Eukaryotic Translation Termination                            | 3.742       | 2.828       |
| Response of EIF2AK4 (GCN2) to amino acid deficiency           | 3.742       | 2.828       |
| EIF2 Signaling                                                | 2.646       | 2.449       |
| Glutamatergic Receptor Signaling Pathway (Enhanced)           | -2.333      | -2.673      |
| Coronavirus Pathogenesis Pathway                              | -2.121      | -2.449      |
| Adrenergic Receptor Signaling Pathway (Enhanced)              | -1.633      | -2.449      |
| Dopamine-DARPP32 Feedback in cAMP Signaling                   | -2          | -2          |
| Pancreatic Secretion Signaling Pathway                        | -2          | -1.89       |
| Synaptic Long Term Potentiation                               | -2          | -1.633      |

| Canonical Pathways                                      | 12mo vs 3mo | 24mo vs 3mo |
|---------------------------------------------------------|-------------|-------------|
| RAR Activation                                          | 1.897       | 1.414       |
| Androgen Signaling                                      | -1          | -2.236      |
| Netrin Signaling                                        | -0.816      | -2.236      |
| Glycolysis I                                            | 3           | N/A         |
| Goi Signaling                                           | 1.342       | 1.414       |
| Cilium Assembly                                         | N/A         | 2.646       |
| Glucose metabolism                                      | 2.646       | N/A         |
| Acetylcholine Receptor Signaling Pathway                | -0.816      | -1.633      |
| GPCR-Mediated Nutrient Sensing in Enteroendocrine Cells | -1.342      | -1          |
| SNARE Signaling Pathway                                 | -1          | -1.342      |
| Gap Junction Signaling                                  | -1.633      | -0.707      |
| Cardiac Hypertrophy Signaling                           | -1.633      | -0.632      |
| Serotonin Receptor Signaling                            | -1.414      | -0.832      |
| Gluconeogenesis I                                       | 2.236       | N/A         |
| Oxytocin Signaling Pathway                              | -1.633      | -0.577      |
| Phototransduction Pathway                               | 1.897       | -0.229      |
| Role of NFAT in Cardiac Hypertrophy                     | -1.414      | -0.632      |
| Signaling by NTRK1 (TRKA)                               | N/A         | 2           |

| Canonical Pathways                        | 12mo vs 3mo | 24mo vs 3mo |
|-------------------------------------------|-------------|-------------|
| Neurovascular Coupling Signaling Pathway  | N/A         | 1.89        |
| G alpha (q) signalling events             | 1           | 0.816       |
| P2Y Purinergic Receptor Signaling Pathway | -1          | -0.707      |
| Hepatic Cholestasis                       | N/A         | -1.633      |
| Mitotic Prometaphase                      | N/A         | 1.633       |
| Potassium Channels                        | N/A         | 1.633       |
| Orexin Signaling Pathway                  | -0.447      | -1.134      |
| Insulin Secretion Signaling Pathway       | -0.816      | -0.707      |

| Canonical Pathways                                                             | 12mo vs 3mo | 24mo vs 3mo |
|--------------------------------------------------------------------------------|-------------|-------------|
| Corticotropin Releasing Hormone Signaling                                      | -0.816      | -0.707      |
| Synaptic Long Term Depression                                                  | -1.134      | 0.333       |
| Role of Macrophages, Fibroblasts and Endothelial Cells in Rheumatoid Arthritis | N/A         | -1.414      |
| CXCR4 Signaling                                                                | 1           | 0.378       |
| RANK Signaling in Osteoclasts                                                  | N/A         | -1.342      |
| Chemokine Signaling                                                            | N/A         | -1.342      |
| Activation of kainate receptors upon glutamate binding                         | N/A         | 1.342       |

**Supplementary table 12: Mouse retinal microglia- Saban lab dataset (GSE195891) -SenMayo-hi vs SenMayo-low –GSEA pathway enrichment terms (FDR-qvalue < 0.05, NES > 1.5)**

| No | ID                                                  | ES           | NES          | pval         | p.adj        | qval         |
|----|-----------------------------------------------------|--------------|--------------|--------------|--------------|--------------|
| 1  | REACTOME_PEPTIDE_LIGAND_BINDING_RECEPTORS           | 0.876<br>355 | 2.626<br>864 | 1.00E<br>-10 | 2.47E<br>-08 | 2.25E<br>-08 |
| 2  | REACTOME_CHEMOKINE_RECEPTORS_BIND_CHEMOKINES        | 0.906<br>001 | 2.393<br>184 | 1.00E<br>-10 | 2.47E<br>-08 | 2.25E<br>-08 |
| 3  | REACTOME_CLASS_A_1_RHODOPSIN_LIKE_RECEPTORS         | 0.739<br>214 | 2.365<br>217 | 1.00E<br>-10 | 2.47E<br>-08 | 2.25E<br>-08 |
| 4  | REACTOME_INTERLEUKIN_10_SIGNALING                   | 0.889<br>059 | 2.346<br>482 | 1.00E<br>-10 | 2.47E<br>-08 | 2.25E<br>-08 |
| 5  | REACTOME_GPCR_LIGAND_BINDING                        | 0.681<br>51  | 2.271<br>781 | 1.00E<br>-10 | 2.47E<br>-08 | 2.25E<br>-08 |
| 6  | KEGG_CYTOKINE_CYTOKINE_RECEPTOR_INTERACTION         | 0.688<br>67  | 2.232<br>509 | 1.00E<br>-10 | 2.47E<br>-08 | 2.25E<br>-08 |
| 7  | KEGG_NOD_LIKE_RECEPTOR_SIGNALING_PATHWAY            | 0.774<br>696 | 2.157<br>461 | 4.77E<br>-07 | 5.90E<br>-05 | 5.37E<br>-05 |
| 8  | KEGG_TYPE_I_DIABETES_MELLITUS                       | 0.819<br>524 | 2.109<br>862 | 5.23E<br>-07 | 6.03E<br>-05 | 5.49E<br>-05 |
| 9  | PID_IL23_PATHWAY                                    | 0.822<br>201 | 2.097<br>101 | 3.33E<br>-06 | 0.000<br>281 | 0.000<br>256 |
| 10 | REACTOME_INTERFERON_ALPHA_BETA_SIGNALING            | 0.740<br>183 | 2.048<br>235 | 8.18E<br>-06 | 0.000<br>643 | 0.000<br>586 |
| 11 | KEGG_GRAFT_VERSUS_HOST_DISEASE                      | 0.820<br>657 | 2.011<br>734 | 4.42E<br>-05 | 0.002<br>836 | 0.002<br>582 |
| 12 | REACTOME_RESOLUTION_OF_SISTER_CHROMATID_COHESION    | 0.649<br>906 | 1.993<br>698 | 7.99E<br>-07 | 8.20E<br>-05 | 7.47E<br>-05 |
| 13 | PID_PLK1_PATHWAY                                    | 0.737<br>198 | 1.981<br>554 | 3.86E<br>-05 | 0.002<br>568 | 0.002<br>337 |
| 14 | KEGG_CYTOSOLIC_DNA_SENSING_PATHWAY                  | 0.747<br>356 | 1.973<br>19  | 5.24E<br>-05 | 0.003<br>24  | 0.002<br>95  |
| 15 | REACTOME_MITOTIC_METAPHASE_AND_ANAPHASE             | 0.587<br>118 | 1.955<br>958 | 1.19E<br>-08 | 2.07E<br>-06 | 1.88E<br>-06 |
| 16 | REACTOME_INTERFERON_SIGNALING                       | 0.610<br>779 | 1.954<br>981 | 1.67E<br>-07 | 2.41E<br>-05 | 2.19E<br>-05 |
| 17 | REACTOME_KINESINS                                   | 0.704<br>6   | 1.919<br>339 | 9.24E<br>-05 | 0.004<br>845 | 0.004<br>41  |
| 18 | KEGG_SYSTEMIC_LUPUS_ERYTHEMATOSUS                   | 0.727<br>418 | 1.901<br>845 | 0.000<br>317 | 0.011<br>689 | 0.010<br>641 |
| 19 | REACTOME_CELL_CYCLE_MITOTIC                         | 0.530<br>441 | 1.891<br>979 | 1.00E<br>-10 | 2.47E<br>-08 | 2.25E<br>-08 |
| 20 | REACTOME_INTERLEUKIN_4_AND_INTERLEUKIN_13_SIGNALING | 0.630<br>398 | 1.888<br>17  | 2.45E<br>-05 | 0.001<br>766 | 0.001<br>608 |
| 21 | KEGG_LEISHMANIA_INFECTION                           | 0.671<br>491 | 1.881<br>004 | 0.000<br>154 | 0.006<br>655 | 0.006<br>058 |
| 22 | REACTOME_CONDENSATION_OF_PROPHASE_CHROMOSOMES       | 0.888<br>407 | 1.879<br>623 | 7.74E<br>-05 | 0.004<br>324 | 0.003<br>936 |
| 23 | KEGG_CHEMOKINE_SIGNALING_PATHWAY                    | 0.587<br>547 | 1.879<br>506 | 3.41E<br>-06 | 0.000<br>281 | 0.000<br>256 |
| 24 | REACTOME_M_PHASE                                    | 0.541<br>266 | 1.876<br>974 | 1.78E<br>-09 | 3.85E<br>-07 | 3.51E<br>-07 |
| 25 | REACTOME_GAP_JUNCTION_ASSEMBLY                      | 0.859<br>146 | 1.865<br>015 | 0.000<br>227 | 0.008<br>946 | 0.008<br>144 |

| No | ID                                                                 | ES           | NES          | pval         | p.adj        | qval         |
|----|--------------------------------------------------------------------|--------------|--------------|--------------|--------------|--------------|
| 26 | PID_IL12_2PATHWAY                                                  | 0.665<br>663 | 1.864<br>68  | 0.000<br>19  | 0.007<br>818 | 0.007<br>117 |
| 27 | PID_IL27_PATHWAY                                                   | 0.780<br>196 | 1.864<br>442 | 0.000<br>473 | 0.016<br>364 | 0.014<br>897 |
| 28 | PID_AURORA_B_PATHWAY                                               | 0.718<br>624 | 1.862<br>496 | 0.000<br>563 | 0.019<br>019 | 0.017<br>314 |
| 29 | REACTOME_SEPARATION_OF_SISTER_CHROMATIDS                           | 0.573<br>726 | 1.860<br>034 | 1.47E<br>-06 | 0.000<br>134 | 0.000<br>122 |
| 30 | KEGG_ALLOGRAFT_REJECTION                                           | 0.756<br>658 | 1.854<br>848 | 0.000<br>933 | 0.029<br>378 | 0.026<br>744 |
| 31 | REACTOME_MITOTIC_PROMETAPHASE                                      | 0.567<br>487 | 1.849<br>475 | 8.05E<br>-07 | 8.20E<br>-05 | 7.47E<br>-05 |
| 32 | KEGG_HEMATOPOIETIC_CELL_LINEAGE                                    | 0.642<br>669 | 1.846<br>66  | 0.000<br>133 | 0.006<br>155 | 0.005<br>603 |
| 33 | BIOCARTA_INFLAM_PATHWAY                                            | 0.842<br>159 | 1.846<br>534 | 0.000<br>289 | 0.010<br>865 | 0.009<br>891 |
| 34 | REACTOME_NUCLEAR_ENVELOPE_NE_REASSEMBLY                            | 0.642<br>209 | 1.845<br>338 | 0.000<br>135 | 0.006<br>155 | 0.005<br>603 |
| 35 | PID_AURORA_A_PATHWAY                                               | 0.736<br>508 | 1.841<br>258 | 0.000<br>915 | 0.029<br>333 | 0.026<br>702 |
| 36 | REACTOME_SIGNALING_BY_INTERLEUKINS                                 | 0.519<br>302 | 1.830<br>954 | 3.46E<br>-09 | 6.66E<br>-07 | 6.06E<br>-07 |
| 37 | KEGG_TOLL_LIKE_RECEPTOR_SIGNALING_PATHWAY                          | 0.617<br>22  | 1.827<br>994 | 0.000<br>107 | 0.005<br>124 | 0.004<br>665 |
| 38 | REACTOME_TRANSPORT_OF_CONNEXONS_TO_THE_PLASMA_MEMBRANE             | 0.878<br>586 | 1.823<br>217 | 0.000<br>571 | 0.019<br>019 | 0.017<br>314 |
| 39 | REACTOME_SCAVENGING_BY_CLASS_A_RECEPTORS                           | 0.880<br>174 | 1.818<br>905 | 0.000<br>378 | 0.013<br>362 | 0.012<br>164 |
| 40 | REACTOME_MITOTIC_SPINDLE_CHECKPOINT                                | 0.593<br>913 | 1.806<br>775 | 0.000<br>14  | 0.006<br>229 | 0.005<br>671 |
| 41 | PID_SYNDECAN_1_PATHWAY                                             | 0.715<br>949 | 1.801<br>267 | 0.001<br>343 | 0.037<br>49  | 0.034<br>128 |
| 42 | REACTOME_CELL_CYCLE_CHECKPOINTS                                    | 0.527<br>778 | 1.786<br>884 | 9.75E<br>-07 | 9.37E<br>-05 | 8.53E<br>-05 |
| 43 | REACTOME_MHC_CLASS_II_ANTIGEN_PRESENTATION                         | 0.587<br>596 | 1.776<br>86  | 9.60E<br>-05 | 0.004<br>872 | 0.004<br>435 |
| 44 | BIOCARTA_ERYTH_PATHWAY                                             | 0.885<br>989 | 1.761<br>975 | 0.000<br>991 | 0.030<br>629 | 0.027<br>883 |
| 45 | KEGG_CELL_CYCLE                                                    | 0.570<br>281 | 1.759<br>545 | 0.000<br>175 | 0.007<br>393 | 0.006<br>73  |
| 46 | REACTOME_THE_ROLE_OF_GTSE1_IN_G2_M_PROGRESSION_AFTER_G2_CHECKPOINT | 0.604<br>767 | 1.754<br>593 | 0.000<br>894 | 0.029<br>192 | 0.026<br>574 |
| 47 | KEGG_RIG_I_LIKE_RECEPTOR_SIGNALING_PATHWAY                         | 0.639<br>047 | 1.754<br>15  | 0.001<br>869 | 0.046<br>011 | 0.041<br>885 |
| 48 | REACTOME_RHO_GTPASES_ACTIVATE_FORMINS                              | 0.563<br>009 | 1.750<br>539 | 7.35E<br>-05 | 0.004<br>243 | 0.003<br>862 |
| 49 | REACTOME_CONDENSATION_OF_PROMETAPHASE_CHROMOSOMES                  | 0.879<br>954 | 1.749<br>975 | 0.001<br>158 | 0.034<br>287 | 0.031<br>213 |
| 50 | REACTOME_INTRAFLAGELLAR_TRANSPORT                                  | 0.642<br>062 | 1.743<br>791 | 0.001<br>382 | 0.037<br>872 | 0.034<br>476 |
| 51 | BIOCARTA_CELLCYCLE_PATHWAY                                         | 0.754<br>271 | 1.737<br>22  | 0.001<br>254 | 0.036<br>186 | 0.032<br>942 |
| 52 | PID_ANTHRAX_PATHWAY                                                | 0.804<br>881 | 1.731<br>182 | 0.001<br>697 | 0.043<br>855 | 0.039<br>923 |
| 53 | REACTOME_INTERFERON_GAMMA_SIGNALING                                | 0.592<br>633 | 1.725<br>158 | 0.001<br>169 | 0.034<br>287 | 0.031<br>213 |
| 54 | REACTOME_APC_C_MEDIATED_DEGRADATION_OF_CELL_CYCLE_PROTEINS         | 0.580<br>645 | 1.711<br>123 | 0.001<br>501 | 0.039<br>965 | 0.036<br>382 |
| 55 | PID_INTEGRIN1_PATHWAY                                              | 0.621<br>646 | 1.706<br>548 | 0.001<br>941 | 0.046<br>017 | 0.041<br>891 |
| 56 | REACTOME_MITOTIC_PROPHASE                                          | 0.576<br>148 | 1.692<br>777 | 0.002<br>101 | 0.049<br>153 | 0.044<br>746 |
| 57 | REACTOME_G_ALPHA_I_SIGNALING_EVENTS                                | 0.514<br>848 | 1.690<br>573 | 8.84E<br>-05 | 0.004<br>78  | 0.004<br>351 |
| 58 | REACTOME_SIGNALING_BY_GPCR                                         | 0.477<br>054 | 1.689<br>409 | 1.32E<br>-07 | 2.08E<br>-05 | 1.89E<br>-05 |
| 59 | PID_API_PATHWAY                                                    | 0.590<br>76  | 1.675<br>155 | 0.001<br>879 | 0.046<br>011 | 0.041<br>885 |
| 60 | REACTOME_MITOTIC_G2_G2_M_PHASES                                    | 0.511<br>42  | 1.656<br>646 | 9.85E<br>-05 | 0.004<br>872 | 0.004<br>435 |

| No | ID                                                                             | ES           | NES          | pval         | p.adj        | qval         |
|----|--------------------------------------------------------------------------------|--------------|--------------|--------------|--------------|--------------|
| 61 | REACTOME_CHROMOSOME_MAINTENANCE                                                | 0.554<br>509 | 1.645<br>951 | 0.001<br>897 | 0.046<br>011 | 0.041<br>885 |
| 62 | REACTOME_RHO_GTPASE_EFFECTORS                                                  | 0.485<br>009 | 1.639<br>706 | 6.54E<br>-05 | 0.003<br>902 | 0.003<br>552 |
| 63 | REACTOME_FACTORS_INVOLVED_IN_MEGAKARYOCYTE_DEVELOPMENT_AND_PLATELET_PRODUCTION | 0.520<br>056 | 1.609<br>959 | 0.001<br>598 | 0.041<br>907 | 0.038<br>15  |
| 64 | REACTOME_MITOTIC_G1_PHASE_AND_G1_S_TRANSITION                                  | 0.505<br>535 | 1.597<br>91  | 0.001<br>331 | 0.037<br>49  | 0.034<br>128 |
| 65 | REACTOME_S_PHASE                                                               | 0.488<br>714 | 1.562<br>19  | 0.001<br>766 | 0.044<br>949 | 0.040<br>918 |
| 66 | REACTOME_NEUTROPHIL_DEGRANULATION                                              | 0.439<br>447 | 1.545<br>494 | 3.73E<br>-05 | 0.002<br>568 | 0.002<br>337 |

**Supplementary table 13a: Mouse retinal microglia-SenMayo-hi vs SenMayo-low –Top 50 GSEA pathway enrichment terms obtained after removing the microglial activation genes (Marsh et al, 2022) from the input gene list (FDR-qvalue < 0.05, NES > 1.5)**

| No | ID                                                    | ES           | NES          | pval         | p.adj        | qval         |
|----|-------------------------------------------------------|--------------|--------------|--------------|--------------|--------------|
| 1  | REACTOME_PEPTIDE_LIGAND_BINDING_RECEPTORS             | 0.838<br>671 | 2.185<br>224 | 1.00E<br>-10 | 6.64E<br>-09 | 5.24E<br>-09 |
| 2  | KEGG_CYTOKINE_CYTOKINE_RECEPTOR_INTERACTION           | 0.797<br>586 | 2.166<br>048 | 1.00E<br>-10 | 6.64E<br>-09 | 5.24E<br>-09 |
| 3  | REACTOME_INTERLEUKIN_4_AND_INTERLEUKIN_13_SIGNALING   | 0.809<br>714 | 2.026<br>72  | 3.11E<br>-10 | 1.93E<br>-08 | 1.52E<br>-08 |
| 4  | REACTOME_CHEMOKINE_RECEPTORS_BIND_CHEMOKINES          | 0.916<br>964 | 1.985<br>409 | 2.44E<br>-09 | 1.37E<br>-07 | 1.08E<br>-07 |
| 5  | KEGG_LEISHMANIA_INFECTION                             | 0.854<br>765 | 1.982<br>03  | 7.73E<br>-09 | 4.18E<br>-07 | 3.29E<br>-07 |
| 6  | REACTOME_CLASS_A_1_RHODOPSIN_LIKE_RECEPTORS           | 0.717<br>343 | 1.979<br>697 | 1.00E<br>-10 | 6.64E<br>-09 | 5.24E<br>-09 |
| 7  | REACTOME_INTERLEUKIN_10_SIGNALING                     | 0.913<br>832 | 1.967<br>6   | 7.92E<br>-09 | 4.18E<br>-07 | 3.29E<br>-07 |
| 8  | KEGG_HEMATOPOIETIC_CELL_LINEAGE                       | 0.818<br>981 | 1.955<br>032 | 1.59E<br>-08 | 8.14E<br>-07 | 6.41E<br>-07 |
| 9  | KEGG_JAK_STAT_SIGNALING_PATHWAY                       | 0.749<br>343 | 1.927<br>157 | 2.12E<br>-08 | 1.06E<br>-06 | 8.32E<br>-07 |
| 10 | PID_IL23_PATHWAY                                      | 0.912<br>551 | 1.912<br>026 | 4.94E<br>-07 | 1.97E<br>-05 | 1.55E<br>-05 |
| 11 | KEGG_NOD_LIKE_RECEPTOR_SIGNALING_PATHWAY              | 0.826<br>364 | 1.900<br>973 | 4.33E<br>-07 | 1.77E<br>-05 | 1.39E<br>-05 |
| 12 | REACTOME_SIGNALING_BY_INTERLEUKINS                    | 0.661<br>141 | 1.896<br>429 | 1.00E<br>-10 | 6.64E<br>-09 | 5.24E<br>-09 |
| 13 | KEGG_LYSOSOME                                         | 0.736<br>151 | 1.895<br>773 | 5.46E<br>-08 | 2.58E<br>-06 | 2.03E<br>-06 |
| 14 | KEGG_LEUKOCYTE_TRANSENDOTHELIAL_MIGRATION             | 0.743<br>68  | 1.894<br>009 | 1.70E<br>-07 | 7.26E<br>-06 | 5.72E<br>-06 |
| 15 | KEGG_ANTIGEN_PROCESSING_AND_PRESENTATION              | 0.836<br>895 | 1.877<br>501 | 8.86E<br>-07 | 3.31E<br>-05 | 2.61E<br>-05 |
| 16 | KEGG_TOLL_LIKE_RECEPTOR_SIGNALING_PATHWAY             | 0.766<br>546 | 1.872<br>556 | 1.02E<br>-06 | 3.65E<br>-05 | 2.88E<br>-05 |
| 17 | KEGG_COMPLEMENT_AND_COAGULATION_CASCADES              | 0.811<br>48  | 1.846<br>512 | 5.74E<br>-06 | 0.000<br>166 | 0.000<br>131 |
| 18 | REACTOME_TOLL_LIKE_RECEPTOR_CASCADES                  | 0.701<br>274 | 1.842<br>943 | 1.01E<br>-07 | 4.52E<br>-06 | 3.56E<br>-06 |
| 19 | PID_IL6_7_PATHWAY                                     | 0.828<br>57  | 1.835<br>883 | 4.55E<br>-06 | 0.000<br>138 | 0.000<br>109 |
| 20 | KEGG_SYSTEMIC_LUPUS_ERYTHEMATOSUS                     | 0.824<br>997 | 1.808<br>292 | 5.43E<br>-05 | 0.001<br>282 | 0.001<br>01  |
| 21 | PID_IL4_2PATHWAY                                      | 0.788<br>058 | 1.805<br>987 | 1.14E<br>-05 | 0.000<br>314 | 0.000<br>248 |
| 22 | REACTOME_INTERFERON_GAMMA_SIGNALING                   | 0.733<br>366 | 1.805<br>323 | 5.23E<br>-06 | 0.000<br>157 | 0.000<br>123 |
| 23 | REACTOME_NEUTROPHIL_DEGRANULATION                     | 0.622<br>667 | 1.794<br>443 | 1.00E<br>-10 | 6.64E<br>-09 | 5.24E<br>-09 |
| 24 | PID_AMB2_NEUTROPHILS_PATHWAY                          | 0.829<br>771 | 1.783<br>259 | 4.04E<br>-05 | 0.001<br>006 | 0.000<br>792 |
| 25 | REACTOME_FCGAMMA_RECEPTOR_FCGR_DEPENDENT_PHAGOCYTOSIS | 0.721<br>19  | 1.777<br>193 | 2.52E<br>-05 | 0.000<br>655 | 0.000<br>516 |
| 26 | REACTOME_INTERFERON_ALPHA_BETA_SIGNALING              | 0.771<br>639 | 1.775<br>082 | 3.98E<br>-05 | 0.001<br>005 | 0.000<br>792 |



| No | ID                                                                                | ES           | NES          | pval         | p.adj        | qval         |
|----|-----------------------------------------------------------------------------------|--------------|--------------|--------------|--------------|--------------|
| 27 | REACTOME_NUCLEAR_EVENTS_KINASE_AND_TRANSCRIPTION_FACTOR_ACTIVATION                | 0.763<br>886 | 1.771<br>298 | 3.65E<br>-05 | 0.000<br>935 | 0.000<br>737 |
| 28 | PID_FRA_PATHWAY                                                                   | 0.822<br>469 | 1.769<br>158 | 5.33E<br>-05 | 0.001<br>275 | 0.001<br>005 |
| 29 | REACTOME_RAC1_GTPASE_CYCLE                                                        | 0.653<br>693 | 1.768<br>187 | 1.29E<br>-06 | 4.46E<br>-05 | 3.52E<br>-05 |
| 30 | PID_IL12_2PATHWAY                                                                 | 0.769<br>386 | 1.763<br>198 | 4.68E<br>-05 | 0.001<br>151 | 0.000<br>907 |
| 31 | PID_BCR_5PATHWAY                                                                  | 0.751<br>609 | 1.757<br>064 | 9.12E<br>-05 | 0.002<br>07  | 0.001<br>632 |
| 32 | PID_API1_PATHWAY                                                                  | 0.757<br>288 | 1.755<br>999 | 5.59E<br>-05 | 0.001<br>303 | 0.001<br>027 |
| 33 | REACTOME_INTERLEUKIN_2_FAMILY_SIGNALING                                           | 0.791<br>227 | 1.747<br>083 | 0.000<br>178 | 0.003<br>705 | 0.002<br>919 |
| 34 | KEGG_B_CELL_RECEPTOR_SIGNALING_PATHWAY                                            | 0.726<br>78  | 1.742<br>876 | 7.63E<br>-05 | 0.001<br>755 | 0.001<br>383 |
| 35 | PID_NFAT_TFPATHWAY                                                                | 0.813<br>756 | 1.738<br>059 | 0.000<br>138 | 0.002<br>992 | 0.002<br>358 |
| 36 | REACTOME_INTERFERON_SIGNALING                                                     | 0.645<br>094 | 1.733<br>712 | 3.46E<br>-06 | 0.000<br>107 | 8.42E<br>-05 |
| 37 | KEGG_GRAFT_VERSUS_HOST_DISEASE                                                    | 0.859<br>182 | 1.730<br>761 | 0.000<br>291 | 0.005<br>229 | 0.004<br>121 |
| 38 | PID_INTEGRIN2_PATHWAY                                                             | 0.871<br>603 | 1.728<br>056 | 0.000<br>371 | 0.005<br>992 | 0.004<br>721 |
| 39 | REACTOME_IMMUNOREGULATORY_INTERACTIONS_BETWEEN_A_LYMPHOID_AND_A_NON_LYMPHOID_CELL | 0.701<br>147 | 1.723<br>974 | 0.000<br>11  | 0.002<br>399 | 0.001<br>891 |
| 40 | KEGG_APOPTOSIS                                                                    | 0.695<br>713 | 1.704<br>206 | 0.000<br>313 | 0.005<br>278 | 0.004<br>159 |
| 41 | BIOCARTA_MAPK_PATHWAY                                                             | 0.697<br>146 | 1.701<br>833 | 0.000<br>193 | 0.003<br>928 | 0.003<br>096 |
| 42 | PID_INTEGRIN_A4B1_PATHWAY                                                         | 0.796<br>945 | 1.700<br>22  | 0.000<br>524 | 0.007<br>808 | 0.006<br>153 |
| 43 | KEGG_CYTOSOLIC_DNA_SENSING_PATHWAY                                                | 0.782<br>4   | 1.694<br>051 | 0.000<br>611 | 0.008<br>839 | 0.006<br>965 |
| 44 | BIOCARTA_NTHI_PATHWAY                                                             | 0.853<br>308 | 1.691<br>783 | 0.000<br>802 | 0.011<br>066 | 0.008<br>72  |
| 45 | REACTOME_TRANSCRIPTIONAL_REGULATION_OF GRANULOPOIESIS                             | 0.800<br>481 | 1.691<br>762 | 0.000<br>752 | 0.010<br>456 | 0.008<br>239 |
| 46 | REACTOME_TOLL_LIKE_RECEPTOR_TLR1_TLR2_CASCADE                                     | 0.675<br>175 | 1.689<br>968 | 0.000<br>308 | 0.005<br>278 | 0.004<br>159 |
| 47 | BIOCARTA_TID_PATHWAY                                                              | 0.895<br>241 | 1.686<br>669 | 0.000<br>325 | 0.005<br>399 | 0.004<br>254 |
| 48 | REACTOME_PARASITE_INFECTION                                                       | 0.722<br>122 | 1.683<br>235 | 0.000<br>395 | 0.006<br>185 | 0.004<br>873 |
| 49 | REACTOME_MYD88_INDEPENDENT_TLR4_CASCADE                                           | 0.672<br>462 | 1.681<br>69  | 0.000<br>233 | 0.004<br>545 | 0.003<br>581 |
| 50 | PID_SMAD2_3NUCLEAR_PATHWAY                                                        | 0.706<br>608 | 1.681<br>22  | 0.000<br>287 | 0.005<br>209 | 0.004<br>105 |

**Supplementary table 13b: Human retinal microglia- (GSE148077) -SenMayo-hi vs SenMayo-low –GSEA pathway enrichment terms obtained after removing the microglial activation genes (Marsh et al, 2022) from the input gene list (FDR-qvalue < 0.05, NES > 1.5)**

| No | ID                                                  | ES           | NES          | pval         | p.adj        | qval         |
|----|-----------------------------------------------------|--------------|--------------|--------------|--------------|--------------|
| 1  | KEGG_CYTOKINE_CYTOKINE_RECEPTOR_INTERACTION         | 0.760<br>764 | 2.298<br>222 | 1.00E<br>-10 | 1.83E<br>-08 | 1.53E<br>-08 |
| 2  | REACTOME_PEPTIDE_LIGAND_BINDING_RECEPTORS           | 0.776<br>14  | 2.234<br>277 | 1.00E<br>-10 | 1.83E<br>-08 | 1.53E<br>-08 |
| 3  | REACTOME_INTERLEUKIN_4_AND_INTERLEUKIN_13_SIGNALING | 0.804<br>936 | 2.212<br>566 | 2.72E<br>-10 | 4.52E<br>-08 | 3.79E<br>-08 |
| 4  | KEGG_LEISHMANIA_INFECTION                           | 0.833<br>275 | 2.172<br>264 | 7.89E<br>-08 | 7.60E<br>-06 | 6.38E<br>-06 |
| 5  | REACTOME_INTERLEUKIN_10_SIGNALING                   | 0.893<br>446 | 2.157<br>931 | 5.15E<br>-08 | 5.55E<br>-06 | 4.65E<br>-06 |
| 6  | KEGG_COMPLEMENT_AND_COAGULATION_CASCADES            | 0.837<br>38  | 2.147<br>225 | 1.72E<br>-07 | 1.43E<br>-05 | 1.20E<br>-05 |
| 7  | REACTOME_CHEMOKINE_RECEPTORS_BIND_CHEMOKINES        | 0.868<br>92  | 2.136<br>787 | 3.94E<br>-07 | 2.88E<br>-05 | 2.42E<br>-05 |
| 8  | KEGG_INTESTINAL_IMMUNE_NETWORK_FOR_IGA_PRODUCTION   | 0.861<br>15  | 2.107<br>499 | 2.95E<br>-06 | 0.000<br>145 | 0.000<br>122 |

| No | ID                                                            | ES           | NES          | pval         | p.adj        | qval         |
|----|---------------------------------------------------------------|--------------|--------------|--------------|--------------|--------------|
| 9  | KEGG_SYSTEMIC_LUPUS_ERYTHEMATOSUS                             | 0.820<br>92  | 2.061<br>664 | 2.89E<br>-06 | 0.000<br>145 | 0.000<br>122 |
| 10 | REACTOME_CLASS_A_1_RHODOPSIN_LIKE_RECEPTORS                   | 0.658<br>352 | 2.028<br>361 | 1.00E<br>-10 | 1.83E<br>-08 | 1.53E<br>-08 |
| 11 | REACTOME_INTERFERON_GAMMA_SIGNALING                           | 0.744<br>229 | 2.028<br>336 | 2.71E<br>-06 | 0.000<br>141 | 0.000<br>119 |
| 12 | KEGG_AUTOIMMUNE_THYROID_DISEASE                               | 0.868<br>452 | 2.007<br>663 | 1.13E<br>-05 | 0.000<br>449 | 0.000<br>377 |
| 13 | KEGG_ASTHMA                                                   | 0.941<br>346 | 1.973<br>59  | 3.01E<br>-06 | 0.000<br>145 | 0.000<br>122 |
| 14 | KEGG_ALLOGRAFT_REJECTION                                      | 0.874<br>064 | 1.964<br>118 | 3.97E<br>-06 | 0.000<br>186 | 0.000<br>156 |
| 15 | PID_IL23_PATHWAY                                              | 0.871<br>87  | 1.959<br>187 | 4.71E<br>-06 | 0.000<br>215 | 0.000<br>181 |
| 16 | PID_FRA_PATHWAY                                               | 0.853<br>596 | 1.951<br>511 | 2.58E<br>-05 | 0.000<br>857 | 0.000<br>719 |
| 17 | BIOCARTA_INFLAM_PATHWAY                                       | 0.925<br>082 | 1.927<br>423 | 2.26E<br>-05 | 0.000<br>78  | 0.000<br>655 |
| 18 | KEGG_TYPE_I_DIABETES_MELLITUS                                 | 0.801<br>367 | 1.904<br>909 | 0.000<br>129 | 0.002<br>921 | 0.002<br>451 |
| 19 | KEGG_GRAFT_VERSUS_HOST_DISEASE                                | 0.854<br>078 | 1.904<br>133 | 0.000<br>106 | 0.002<br>578 | 0.002<br>163 |
| 20 | PID_API_PATHWAY                                               | 0.743<br>816 | 1.899<br>573 | 9.06E<br>-05 | 0.002<br>367 | 0.001<br>986 |
| 21 | PID_NFAT_TFPATHWAY                                            | 0.808<br>982 | 1.894<br>631 | 0.000<br>47  | 0.007<br>961 | 0.006<br>68  |
| 22 | KEGG_VIRAL_MYOCARDITIS                                        | 0.733<br>545 | 1.890<br>969 | 2.63E<br>-05 | 0.000<br>858 | 0.000<br>72  |
| 23 | KEGG_ANTIGEN_PROCESSING_AND_PRESENTATION                      | 0.735<br>187 | 1.877<br>536 | 0.000<br>141 | 0.003<br>078 | 0.002<br>582 |
| 24 | BIOCARTA_TH1TH2_PATHWAY                                       | 0.920<br>632 | 1.873<br>445 | 9.89E<br>-05 | 0.002<br>477 | 0.002<br>078 |
| 25 | KEGG_HEMATOPOIETIC_CELL_LINEAGE                               | 0.712<br>006 | 1.864<br>989 | 9.68E<br>-05 | 0.002<br>458 | 0.002<br>063 |
| 26 | KEGG_NOD_LIKE_RECEPTOR_SIGNALING_PATHWAY                      | 0.724<br>252 | 1.849<br>609 | 0.000<br>236 | 0.004<br>587 | 0.003<br>849 |
| 27 | BIOCARTA_NTHI_PATHWAY                                         | 0.878<br>883 | 1.842<br>633 | 0.000<br>242 | 0.004<br>639 | 0.003<br>893 |
| 28 | BIOCARTA_NKT_PATHWAY                                          | 0.892<br>869 | 1.841<br>207 | 0.000<br>19  | 0.003<br>94  | 0.003<br>306 |
| 29 | REACTOME_SCAVENGING_BY_CLASS_A_RECEPTORS                      | 0.898<br>429 | 1.828<br>264 | 0.000<br>399 | 0.006<br>891 | 0.005<br>782 |
| 30 | KEGG_TOLL_LIKE_RECEPTOR_SIGNALING_PATHWAY                     | 0.674<br>104 | 1.813<br>033 | 5.93E<br>-05 | 0.001<br>778 | 0.001<br>492 |
| 31 | REACTOME_BINDING_AND_UPTAKE_OF_LIGANDS_BY_SCAVENGER_RECEPTORS | 0.735<br>874 | 1.804<br>783 | 0.001<br>638 | 0.020<br>801 | 0.017<br>455 |
| 32 | BIOCARTA_IL1R_PATHWAY                                         | 0.825<br>872 | 1.800<br>705 | 0.001<br>098 | 0.015<br>586 | 0.013<br>078 |
| 33 | REACTOME_TRANSCRIPTIONAL_REGULATION_OF_GRANULOPOIESIS         | 0.806<br>898 | 1.779<br>876 | 0.001<br>366 | 0.018<br>111 | 0.015<br>197 |
| 34 | BIOCARTA_LAIR_PATHWAY                                         | 0.901<br>248 | 1.778<br>521 | 0.001<br>287 | 0.017<br>308 | 0.014<br>523 |
| 35 | KEGG_CYTOSOLIC_DNA_SENSING_PATHWAY                            | 0.735<br>233 | 1.765<br>613 | 0.001<br>259 | 0.017<br>189 | 0.014<br>424 |
| 36 | REACTOME_COLLAGEN_DEGRADATION                                 | 0.684<br>533 | 1.764<br>525 | 0.000<br>828 | 0.012<br>515 | 0.010<br>501 |
| 37 | PID_UPA_UPAR_PATHWAY                                          | 0.741<br>288 | 1.744<br>25  | 0.001<br>099 | 0.015<br>586 | 0.013<br>078 |
| 38 | BIOCARTA_GRANULOCYTES_PATHWAY                                 | 0.901<br>398 | 1.729<br>581 | 0.002<br>945 | 0.032<br>385 | 0.027<br>174 |
| 39 | PID_IL6_7_PATHWAY                                             | 0.705<br>083 | 1.725<br>553 | 0.003<br>213 | 0.034<br>365 | 0.028<br>836 |
| 40 | REACTOME_COMPLEMENT_CASCADE                                   | 0.685<br>009 | 1.720<br>336 | 0.002<br>755 | 0.030<br>723 | 0.025<br>78  |
| 41 | PID_INTEGRIN2_PATHWAY                                         | 0.793<br>97  | 1.716<br>426 | 0.005<br>072 | 0.047<br>973 | 0.040<br>255 |
| 42 | BIOCARTA_TID_PATHWAY                                          | 0.850<br>167 | 1.713<br>383 | 0.002<br>435 | 0.028<br>022 | 0.023<br>513 |
| 43 | REACTOME_P75NTR_SIGNALS_VIA_NF_KB                             | 0.867<br>667 | 1.712<br>252 | 0.003<br>679 | 0.037<br>794 | 0.031<br>714 |

| No | ID                                                                                    | ES           | NES          | pval         | p.adj        | qval         |
|----|---------------------------------------------------------------------------------------|--------------|--------------|--------------|--------------|--------------|
| 44 | BIOCARTA_TNFR2_PATHWAY                                                                | 0.883<br>281 | 1.710<br>175 | 0.004<br>652 | 0.045<br>255 | 0.037<br>974 |
| 45 | BIOCARTA_COMP_PATHWAY                                                                 | 0.860<br>508 | 1.707<br>588 | 0.001<br>287 | 0.017<br>308 | 0.014<br>523 |
| 46 | REACTOME_IMMUNOREGULATORY_INTERACTIONS_BETWEEN_A_LYM<br>PHOID_AND_A_NON_LYMPHOID_CELL | 0.602<br>707 | 1.705<br>392 | 0.000<br>246 | 0.004<br>639 | 0.003<br>893 |
| 47 | BIOCARTA_NFKB_PATHWAY                                                                 | 0.813<br>101 | 1.694<br>108 | 0.004<br>771 | 0.045<br>929 | 0.038<br>54  |
| 48 | KEGG_RIG_I_LIKE_RECEPTOR_SIGNALING_PATHWAY                                            | 0.667<br>839 | 1.682<br>842 | 0.001<br>859 | 0.022<br>719 | 0.019<br>064 |
| 49 | BIOCARTA_CYTOKINE_PATHWAY                                                             | 0.919<br>763 | 1.681<br>622 | 0.002<br>779 | 0.030<br>8   | 0.025<br>845 |
| 50 | REACTOME_DIGESTION_AND_ABSORPTION                                                     | 0.833<br>434 | 1.679<br>66  | 0.004<br>895 | 0.046<br>626 | 0.039<br>124 |
| 51 | PID_INTEGRIN1_PATHWAY                                                                 | 0.651<br>339 | 1.679<br>055 | 0.001<br>147 | 0.016<br>14  | 0.013<br>543 |
| 52 | PID_NFKAPPAB_CANONICAL_PATHWAY                                                        | 0.799<br>077 | 1.675<br>314 | 0.004<br>489 | 0.044<br>137 | 0.037<br>036 |
| 53 | BIOCARTA_BLYMPHOCYTE_PATHWAY                                                          | 0.914<br>668 | 1.672<br>307 | 0.003<br>43  | 0.035<br>85  | 0.030<br>083 |
| 54 | REACTOME_ORGANIC_CATION_ANION_ZWITTERION_TRANSPORT                                    | 0.890<br>213 | 1.667<br>234 | 0.003<br>528 | 0.036<br>662 | 0.030<br>764 |
| 55 | REACTOME_GPCR_LIGAND_BINDING                                                          | 0.524<br>647 | 1.656<br>051 | 7.02E<br>-08 | 7.13E<br>-06 | 5.98E<br>-06 |
| 56 | PID_HIF1_TFPATHWAY                                                                    | 0.639<br>583 | 1.646<br>441 | 0.001<br>614 | 0.020<br>637 | 0.017<br>317 |
| 57 | KEGG_CHEMOKINE_SIGNALING_PATHWAY                                                      | 0.561<br>144 | 1.634<br>943 | 0.000<br>16  | 0.003<br>393 | 0.002<br>847 |
| 58 | REACTOME_RIP_MEDIATED_NFKB_ACTIVATION_VIA_ZBP1                                        | 0.814<br>396 | 1.616<br>084 | 0.005<br>136 | 0.048<br>171 | 0.040<br>421 |
| 59 | REACTOME_UNFOLDED_PROTEIN_RESPONSE_UPR                                                | 0.586<br>732 | 1.613<br>998 | 0.004<br>04  | 0.039<br>938 | 0.033<br>513 |
| 60 | REACTOME_INTERFERON_SIGNALING                                                         | 0.534<br>736 | 1.595<br>681 | 0.000<br>156 | 0.003<br>365 | 0.002<br>823 |
| 61 | KEGG_LYSOSOME                                                                         | 0.554<br>646 | 1.567<br>054 | 0.002<br>075 | 0.024<br>966 | 0.020<br>95  |
| 62 | REACTOME_SIGNALING_BY_INTERLEUKINS                                                    | 0.497<br>081 | 1.565<br>471 | 4.65E<br>-07 | 3.15E<br>-05 | 2.64E<br>-05 |
| 63 | KEGG_CELL_ADHESION_MOLECULES_CAMS                                                     | 0.548<br>692 | 1.562<br>432 | 0.002<br>49  | 0.028<br>282 | 0.023<br>732 |
| 64 | REACTOME_NEUTROPHIL_DEGRANULATION                                                     | 0.482<br>267 | 1.544<br>442 | 1.11E<br>-06 | 6.55E<br>-05 | 5.49E<br>-05 |

**Supplementary table 13c: Mouse retinal microglia- Saban lab dataset (GSE195891) -SenMayo-hi vs SenMayo-low –GSEA pathway enrichment terms obtained after removing the microglial activation genes (Marsh et al, 2022) from the input gene list (FDR-qvalue < 0.05, NES > 1.5)**

| No | ID                                           | ES           | NES          | pval         | p.adj        | qval         |
|----|----------------------------------------------|--------------|--------------|--------------|--------------|--------------|
| 1  | REACTOME_PEPTIDE_LIGAND_BINDING_RECEPTORS    | 0.868<br>202 | 2.599<br>074 | 1.00E<br>-10 | 2.88E<br>-08 | 2.61E<br>-08 |
| 2  | REACTOME_CLASS_A_1_RHODOPSIN_LIKE_RECEPTORS  | 0.724<br>838 | 2.342<br>855 | 1.00E<br>-10 | 2.88E<br>-08 | 2.61E<br>-08 |
| 3  | REACTOME_CHEMOKINE_RECEPTORS_BIND_CHEMOKINES | 0.898<br>987 | 2.341<br>286 | 1.00E<br>-10 | 2.88E<br>-08 | 2.61E<br>-08 |
| 4  | REACTOME_INTERLEUKIN_10_SIGNALING            | 0.882<br>518 | 2.318<br>811 | 4.51E<br>-10 | 1.11E<br>-07 | 1.01E<br>-07 |
| 5  | REACTOME_GPCR_LIGAND_BINDING                 | 0.665<br>224 | 2.226<br>53  | 1.00E<br>-10 | 2.88E<br>-08 | 2.61E<br>-08 |
| 6  | KEGG_CYTOKINE_CYTOKINE_RECEPTOR_INTERACTION  | 0.677<br>387 | 2.219<br>196 | 1.00E<br>-10 | 2.88E<br>-08 | 2.61E<br>-08 |
| 7  | KEGG_NOD_LIKE_RECEPTOR_SIGNALING_PATHWAY     | 0.786<br>376 | 2.175<br>202 | 3.48E<br>-08 | 5.46E<br>-06 | 4.95E<br>-06 |
| 8  | KEGG_TYPE_I_DIABETES_MELLITUS                | 0.819<br>732 | 2.093<br>872 | 7.04E<br>-07 | 8.11E<br>-05 | 7.35E<br>-05 |
| 9  | PID_IL23_PATHWAY                             | 0.822<br>359 | 2.076<br>116 | 9.92E<br>-06 | 0.000<br>745 | 0.000<br>675 |
| 10 | REACTOME_INTERFERON_ALPHA_BETA_SIGNALING     | 0.745<br>33  | 2.058<br>265 | 3.51E<br>-05 | 0.002<br>333 | 0.002<br>112 |

| No | ID                                                       | ES           | NES          | pval         | p.adj        | qval         |
|----|----------------------------------------------------------|--------------|--------------|--------------|--------------|--------------|
| 1  | KEGG_GRAFT_VERSUS_HOST_DISEASE                           | 0.820<br>865 | 2.019<br>833 | 7.41E<br>-05 | 0.004<br>135 | 0.003<br>743 |
| 1  | REACTOME_RESOLUTION_OF_SISTER_CHROMATID_COHESION         | 0.650<br>186 | 1.993<br>464 | 1.19E<br>-06 | 0.000<br>114 | 0.000<br>103 |
| 1  | KEGG_LEISHMANIA_INFECTION                                | 0.713<br>397 | 1.985<br>981 | 2.22E<br>-05 | 0.001<br>597 | 0.001<br>445 |
| 1  | REACTOME_INTERFERON_SIGNALING                            | 0.613<br>149 | 1.980<br>785 | 1.02E<br>-07 | 1.46E<br>-05 | 1.32E<br>-05 |
| 1  | PID_PLK1_PATHWAY                                         | 0.737<br>481 | 1.974<br>634 | 0.000<br>195 | 0.008<br>532 | 0.007<br>724 |
| 1  | REACTOME_INTERLEUKIN_4_AND_INTERLEUKIN_13_SIGNALING      | 0.658<br>039 | 1.969<br>926 | 4.09E<br>-06 | 0.000<br>353 | 0.000<br>32  |
| 1  | REACTOME_MITOTIC_METAPHASE_AND_ANAPHASE                  | 0.587<br>401 | 1.967<br>939 | 1.21E<br>-08 | 2.09E<br>-06 | 1.89E<br>-06 |
| 1  | REACTOME_CELL_CYCLE_MITOTIC                              | 0.533<br>489 | 1.913<br>379 | 1.00E<br>-10 | 2.88E<br>-08 | 2.61E<br>-08 |
| 1  | REACTOME_KINESINS                                        | 0.704<br>865 | 1.908<br>376 | 0.000<br>25  | 0.010<br>29  | 0.009<br>316 |
| 2  | REACTOME_CONDENSATION_OF_PROPHASE_CHROMOSOMES            | 0.888<br>714 | 1.906<br>015 | 0.000<br>115 | 0.006<br>022 | 0.005<br>451 |
| 2  | REACTOME_GAP_JUNCTION_ASSEMBLY                           | 0.859<br>351 | 1.902<br>891 | 0.000<br>652 | 0.020<br>885 | 0.018<br>908 |
| 2  | REACTOME_M_PHASE                                         | 0.545<br>214 | 1.900<br>131 | 1.72E<br>-09 | 3.30E<br>-07 | 2.99E<br>-07 |
| 2  | KEGG_CYTOSOLIC_DNA_SENSING_PATHWAY                       | 0.729<br>509 | 1.899<br>904 | 0.000<br>16  | 0.007<br>487 | 0.006<br>778 |
| 2  | REACTOME_MITOTIC_PROMETAPHASE                            | 0.573<br>98  | 1.895<br>452 | 3.77E<br>-07 | 4.66E<br>-05 | 4.22E<br>-05 |
| 2  | KEGG_SYSTEMIC_LUPUS_ERYTHEMATOSUS                        | 0.727<br>72  | 1.895<br>244 | 0.000<br>176 | 0.007<br>993 | 0.007<br>236 |
| 2  | PID_IL27_PATHWAY                                         | 0.780<br>518 | 1.885<br>642 | 0.000<br>572 | 0.019<br>034 | 0.017<br>231 |
| 2  | REACTOME_SEPARATION_OF_SISTER_CHROMATIDS                 | 0.574<br>007 | 1.884<br>745 | 1.13E<br>-06 | 0.000<br>114 | 0.000<br>103 |
| 2  | BIOCARTA_INFLAM_PATHWAY                                  | 0.842<br>42  | 1.876<br>147 | 0.000<br>235 | 0.009<br>918 | 0.008<br>978 |
| 2  | KEGG_ALLOGRAFT_REJECTION                                 | 0.756<br>866 | 1.862<br>355 | 0.001<br>137 | 0.031<br>705 | 0.028<br>703 |
| 3  | REACTOME_TRANSPORT_OF_CONNEXONS_TO_THE_PLASMA_MEMBRANE   | 0.878<br>79  | 1.854<br>178 | 0.000<br>281 | 0.011<br>317 | 0.010<br>245 |
| 3  | PID_API_PATHWAY                                          | 0.670<br>179 | 1.853<br>789 | 0.000<br>197 | 0.008<br>532 | 0.007<br>724 |
| 3  | PID_AURORA_B_PATHWAY                                     | 0.718<br>901 | 1.850<br>012 | 0.000<br>398 | 0.014<br>958 | 0.013<br>542 |
| 3  | KEGG_PRION_DISEASES                                      | 0.768<br>646 | 1.847<br>144 | 0.000<br>624 | 0.020<br>359 | 0.018<br>431 |
| 3  | KEGG_CHEMOKINE_SIGNALING_PATHWAY                         | 0.571<br>605 | 1.839<br>994 | 9.54E<br>-06 | 0.000<br>745 | 0.000<br>675 |
| 3  | REACTOME_SIGNALING_BY_INTERLEUKINS                       | 0.521<br>273 | 1.839<br>799 | 8.59E<br>-10 | 1.86E<br>-07 | 1.68E<br>-07 |
| 3  | REACTOME_SCAVENGING_BY_CLASS_A_RECEPTORS                 | 0.880<br>385 | 1.832<br>69  | 0.000<br>501 | 0.017<br>689 | 0.016<br>014 |
| 3  | REACTOME_SENESCENCE_ASSOCIATED_SECRETORY_PHENOTYPE_SASP  | 0.667<br>608 | 1.820<br>676 | 0.001<br>376 | 0.037<br>176 | 0.033<br>655 |
| 3  | PID_AURORA_A_PATHWAY                                     | 0.736<br>803 | 1.818<br>328 | 0.000<br>847 | 0.026<br>614 | 0.024<br>094 |
| 3  | KEGG_HEMATOPOIETIC_CELL_LINEAGE                          | 0.642<br>98  | 1.817<br>806 | 0.000<br>453 | 0.016<br>649 | 0.015<br>072 |
| 4  | REACTOME_NUCLEAR_ENVELOPE_NE_REASSEMBLY                  | 0.642<br>476 | 1.816<br>383 | 0.000<br>47  | 0.016<br>947 | 0.015<br>343 |
| 4  | KEGG_TOLL LIKE RECEPTOR SIGNALING PATHWAY                | 0.621<br>48  | 1.814<br>126 | 0.000<br>149 | 0.007<br>147 | 0.006<br>471 |
| 4  | REACTOME_MITOTIC_SPINDLE_CHECKPOINT                      | 0.594<br>192 | 1.809<br>471 | 4.05E<br>-05 | 0.002<br>508 | 0.002<br>27  |
| 4  | REACTOME_PURINERGIC_SIGNALING_IN_LEISHMANIASIS_INFECTION | 0.761<br>406 | 1.804<br>875 | 0.000<br>977 | 0.029<br>127 | 0.026<br>369 |
| 4  | PID_FOXM1_PATHWAY                                        | 0.700<br>98  | 1.803<br>895 | 0.000<br>891 | 0.027<br>518 | 0.024<br>912 |
| 4  | REACTOME_MHC_CLASS_II_ANTIGEN_PRESENTATION               | 0.587<br>892 | 1.794<br>695 | 9.59E<br>-05 | 0.005<br>179 | 0.004<br>689 |

| No | ID                                                                             | ES       | NES      | pval     | p.adj    | qval     |
|----|--------------------------------------------------------------------------------|----------|----------|----------|----------|----------|
| 46 | REACTOME_CELL_CYCLE_CHECKPOINTS                                                | 0.528005 | 1.78789  | 1.93E-06 | 0.000175 | 0.000159 |
| 47 | PID_SYNDECAN_1_PATHWAY                                                         | 0.716164 | 1.782575 | 0.001923 | 0.047309 | 0.042829 |
| 48 | REACTOME_RHO_GTPASES_ACTIVATE_FORMINS                                          | 0.570355 | 1.778378 | 6.89E-05 | 0.00411  | 0.003721 |
| 49 | PID_IL12_2PATHWAY                                                              | 0.638302 | 1.776944 | 0.001549 | 0.04057  | 0.036728 |
| 50 | REACTOME_THE_ROLE_OF_GTSE1_IN_G2_M_PROGRESSION_AFTER_G2_CHECKPOINT             | 0.620259 | 1.763817 | 0.000526 | 0.0182   | 0.016477 |
| 51 | REACTOME_APC_C_CDC20_MEDIATED_DEGRADATION_OF_CYCLIN_B                          | 0.744053 | 1.76374  | 0.001927 | 0.047309 | 0.042829 |
| 52 | KEGG_EPITHELIAL_CELL_SIGNALING_IN_HELICOBACTER_PYLORI_INFECTIION               | 0.627923 | 1.762639 | 0.000929 | 0.028186 | 0.025517 |
| 53 | KEGG_CELL_CYCLE                                                                | 0.570528 | 1.753306 | 0.000131 | 0.006683 | 0.00605  |
| 54 | REACTOME_INTERFERON_GAMMA_SIGNALING                                            | 0.592932 | 1.712698 | 0.001016 | 0.02927  | 0.026498 |
| 55 | BIOCARTA_ERYTH_PATHWAY                                                         | 0.875079 | 1.708475 | 0.001943 | 0.047309 | 0.042829 |
| 56 | REACTOME_APC_C_MEDIATED_DEGRADATION_OF_CELL_CYCLE_PROTEINS                     | 0.580922 | 1.706321 | 0.001843 | 0.047309 | 0.042829 |
| 57 | REACTOME_MITOTIC_G2_G2_M_PHASES                                                | 0.518613 | 1.703768 | 4.06E-05 | 0.002508 | 0.00227  |
| 58 | REACTOME_MITOTIC_PROPHASE                                                      | 0.576415 | 1.680535 | 0.002092 | 0.049557 | 0.044864 |
| 59 | REACTOME_G_ALPHA_I_SIGNALLING_EVENTS                                           | 0.504593 | 1.67357  | 7.41E-05 | 0.004135 | 0.003743 |
| 60 | REACTOME_SIGNALING_BY_GPCR                                                     | 0.465674 | 1.659974 | 1.09E-06 | 0.000114 | 0.000103 |
| 61 | REACTOME_RHO_GTPASE_EFFECTORS                                                  | 0.488944 | 1.65324  | 3.33E-05 | 0.002301 | 0.002084 |
| 62 | REACTOME_MITOTIC_G1_PHASE_AND_G1_S_TRANSITION                                  | 0.50578  | 1.609145 | 0.001203 | 0.033024 | 0.029897 |
| 63 | REACTOME_NEUTROPHIL_DEGRANULATION                                              | 0.452268 | 1.605896 | 6.06E-06 | 0.000499 | 0.000451 |
| 64 | REACTOME_FACTORS_INVOLVED_IN_MEGAKARYOCYTE_DEVELOPMENT_AND_PLATELET_PRODUCTION | 0.520324 | 1.604225 | 0.002011 | 0.048295 | 0.043721 |
| 65 | REACTOME_CELLULAR_SENESCENCE                                                   | 0.515424 | 1.598848 | 0.001061 | 0.030077 | 0.027228 |
| 66 | REACTOME_S_PHASE                                                               | 0.488933 | 1.573504 | 0.001403 | 0.037331 | 0.033796 |
